# Supplementary material for: Organocatalytic (3+3)-cycloaddition of ortho-substituted phenyl nitrones with aryl cyclopropane carbaldehydes: a facile access to enantioenriched 1,2-oxazinanes
Source: Royal Society of Chemistry journal article supplement (doi:10.1039/d3cc02877a), 2023-01-01
Supplement: d3cc02877a1.pdf [file d3cc02877a1.pdf]

## Supporting Information

### **Organocatalytic (3+3)-cycloaddition of *ortho*-substituted phenyl nitrones with aryl cyclopropane carbaldehydes: A facile access towards the synthesis of enantioenriched 1,2-oxazinanes**

Arijit Hazra, Asit Ghosh, Neeraj Yadav, and Prabal Banerjee\*

---

Lab no-406, Department of Chemistry, Indian Institute of Technology Ropar, Rupnagar, Punjab-140001, India  
E-mail: [prabal@iitrpr.ac.in](mailto:prabal@iitrpr.ac.in)

# Contents

|                                                                                                                                                      |            |
|------------------------------------------------------------------------------------------------------------------------------------------------------|------------|
| <b>1. General information</b>                                                                                                                        | <b>S3</b>  |
| <b>2. General procedure for preparation of cyclopropane carbaldehydes</b>                                                                            | <b>S3</b>  |
| <b>3. General procedure for preparation of 2-substituted nitrones</b>                                                                                | <b>S6</b>  |
| <b>4. Optimization Table</b>                                                                                                                         | <b>S9</b>  |
| <b>5. Representative procedure and substrate scope for the (3+3)-cycloaddition<br/>between cyclopropane carbaldehydes and 2-substituted Nitrones</b> | <b>S9</b>  |
| <b>6. Chemical transformation</b>                                                                                                                    | <b>S17</b> |
| <b>7. NMR, Mass and HPLC spectra of compounds</b>                                                                                                    | <b>S18</b> |
| <b>8. X-ray data of 5aa</b>                                                                                                                          | <b>S76</b> |
| <b>9. Control experiments</b>                                                                                                                        | <b>S78</b> |
| <b>10. Rearrangement reaction for the production of aryl aldehydes</b>                                                                               | <b>S79</b> |
| <b>11. References</b>                                                                                                                                | <b>S80</b> |

## 1. General Information

All reactions were carried out under inert atmosphere with oven-dried glasswares. All solvents and reagents were obtained from commercial sources and were purified following the standard procedure prior to use. Powdered molecular sieves (4Å MS) were dried at 200 °C under vacuum prior to use. Thin-layer chromatography was performed on Merck precoated silica gel 60 F254 aluminum sheets with detection under UV light at 254 nm and charring with *p*-anisaldehyde solution. Chromatographic purifications were performed with silica gel (230-400 mesh) and melting points were taken on Stuart digital melting point apparatus. Nuclear magnetic resonance (NMR) spectroscopy was performed using JEOL 400 MHz and HRMS was recorded on Waters Xevo G2-XS (Q-TOF). The <sup>1</sup>H NMR and <sup>13</sup>C NMR spectra were recorded in CDCl<sub>3</sub>. Chemical shifts of <sup>1</sup>H and <sup>13</sup>C NMR spectra are expressed in parts per million (ppm). All coupling constants are absolute values and are expressed in Hertz. The description of the signals includes the following: s = singlet, d = doublet, dd = doublet of doublet, t = triplet, dt = doublet of triplet, q = quartet, dq = doublet of quartet, br = broad, and m = multiplet. Optical rotations were measured on a Anton Paar MCP 200, [α]<sup>D</sup> values are given in deg·cm<sup>3</sup>·g<sup>-1</sup>·dm<sup>-1</sup>; concentration (c) in g (100 mL)<sup>-1</sup>. The enantiomeric excess (*ee*) values of the products were determined by High Performance Liquid Chromatography (Waters modular system) using Daicel Chiralpak IC, and ASH columns as chiral stationary phase.

## 2. General procedure for the preparation of *trans*-2-Arylcyclopropanecarbaldehydes (**1**)<sup>1</sup>

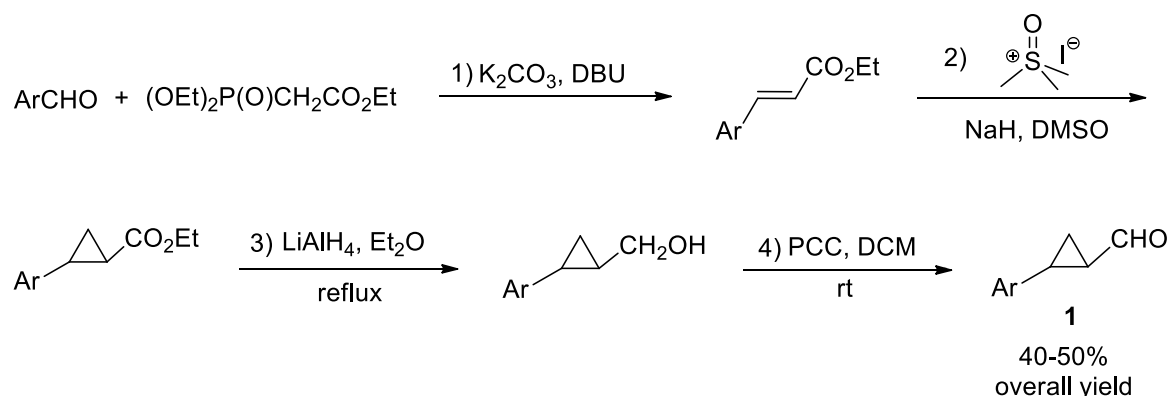

1) To a mixture of triethyl phosphonoacetate (1.1 equiv.), DBU (0.035 equiv.), and finely ground K<sub>2</sub>CO<sub>3</sub> (2 equiv.) was added ArCHO (1 equiv.) and the resulting mixture was stirred using a magnetic stirrer for 4 h at room temperature under argon atmosphere. Ethyl acetate was added to the crude mixture and the solid was filtered off. The solid was rinsed with ethyl acetate and the combined filtrate was concentrated. The resulting oil was distilled under reduced pressure using a bulb-to-bulb apparatus (10 mm Hg/240 °C) to give corresponding alkene (yield 84%) (E:Z = 99:1).

2) A suspension of TMSOI (1.2 equiv.) and NaH (1.5 equiv.) in anhydrous DMSO (15 mL) was stirred for 1 h. A DMSO solution (14 mL) of alkene (14 mmol, 1 equiv) was added at 0 °C. The reaction mixture was stirred at 55 °C for 24 h. Another suspension of TMSOI (0.3 equiv.) and NaH (0.3 equiv.) in DMSO (10 mL) was added to the reaction mixture and reaction was stirred at 65 °C for 84 h. The solution was poured into a brine solution and extracted with

ethyl acetate. Combined organic layer was washed with water and dried over  $\text{MgSO}_4$ , concentrated and purified by silica gel column to afford corresponding cyclopropane derivative as a white solid (60-80% yield).

3) To a stirred solution of LAH (1.5 equiv.) in 7 mL diethyl ether was added dropwise a solution of cyclopropane ester (0.90 mmol, 1equiv.) in 3 mL diethyl ether under  $\text{N}_2$  atmosphere. After addition was completed the reaction mixture was refluxed for another 6 h. The reaction mixture was then cooled to rt, and the excess LAH was destroyed by water. 15 mL of 10%  $\text{H}_2\text{SO}_4$  and 8 mL of ether was added and the aqueous layer was extracted several times with diethyl ether. The combined organic layer was washed with water and 5%  $\text{NaHCO}_3$ , dried over  $\text{MgSO}_4$  and concentrated in a rotary evaporator (90-95% yield). Without any further purification, the crude material (a colorless oil) was used for next step.

4) To a solution of cyclopropane alcohol (6.8 mmol, 1 equiv.) in dry DCM (14 mL), PCC (2 equiv.) was added in a portion-wise manner through a solid addition tube under  $\text{N}_2$  atmosphere. After 3 h reaction mixture was filtered through a small plug of celite and concentrated in vacuo. The crude mixture was purified by silica gel column chromatography using ethyl acetate in hexane as an eluent. Starting from aryl aldehyde the 2-arylcyclopropanecarbaldehydes was obtained in 40-55% overall yield.

***trans*-2-(4-methoxyphenyl)cyclopropane-1-carbaldehyde (1a)**

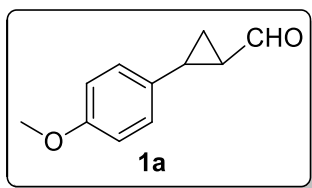

**$^1\text{H NMR}$  (400 MHz):**  $\delta$  9.30 (d,  $J = 4.9$  Hz, 1H), 7.05 (d,  $J = 8.7$  Hz, 2H), 6.83 (d,  $J = 8.7$  Hz, 2H), 3.79 (s, 3H) 2.63-2.56 (m, 1H), 2.13-2.06 (m, 1H), 1.73-1.67 (m, 1H), 1.51-1.45 (m, 1H)

***trans*-2-(4-(benzyloxy)phenyl)cyclopropanecarbaldehyde (1b)**

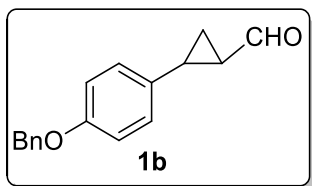

**$^1\text{H NMR}$  (400 MHz):**  $\delta$  9.30 (d,  $J = 4.5$  Hz, 1H), 7.44-7.31 (m, 5H), 7.04 (d,  $J = 8.5$  Hz, 2H), 6.90 (d,  $J = 8.6$  Hz, 2H), 5.04 (s, 2H), 2.62-2.55 (m, 1H), 2.13-2.06 (m, 1H), 1.72-1.67 (m, 1H), 1.51-1.45 (m, 1H)

***trans*-2-(3,4-dimethoxyphenyl)cyclopropanecarbaldehyde (1c)**

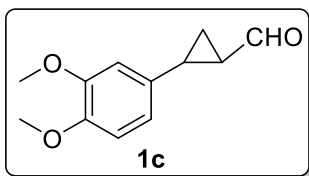

**<sup>1</sup>H NMR (400 MHz):**  $\delta$  9.28 (d,  $J$  = 4.5 Hz, 1H), 6.77 (d,  $J$  = 8.3 Hz, 1H), 6.65 (d,  $J$  = 8.2 Hz, 2H), 3.85 (s, 3H), 3.83 (s, 3H), 2.62-2.55 (m, 1H), 2.13-2.06 (m, 1H), 1.71-1.65 (m, 1H), 1.51-1.46 (m, 1H)

***trans*-2-(3-ethoxy-4-methoxyphenyl)cyclopropanecarbaldehyde (1d)**

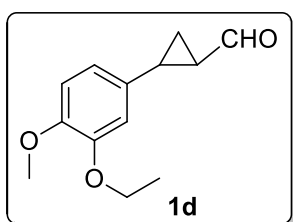

**<sup>1</sup>H NMR (400 MHz, CDCl<sub>3</sub>)**  $\delta$  9.29 (d,  $J$  = 4.8 Hz, 1H), 6.78 (d,  $J$  = 8.8 Hz, 1H), 6.66-6.63 (m, 2H), 4.07 (q,  $J$  = 7.0 Hz, 2H), 3.84 (s, 3H), 2.61-2.54 (m, 1H), 2.12-2.05 (m, 1H), 1.72-1.65 (m, 1H), 1.50-1.46 (m, 1H), 1.45 (t,  $J$  = 7.0 Hz, 3H)

***trans*-2-(benzo[*d*][1,3]dioxol-5-yl)cyclopropanecarbaldehyde (1e)**

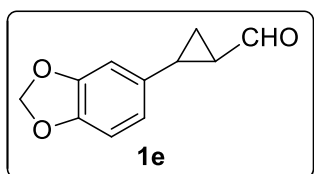

**<sup>1</sup>H NMR (400 MHz):**  $\delta$  9.30 (d,  $J$  = 4.6 Hz, 1H), 6.73 (d,  $J$  = 8.2 Hz, 1H), 6.62 (d,  $J$  = 8.0 Hz, 1H), 6.57 (s, 1H), 5.93 (s, 2H), 2.60-2.55 (m, 1H), 2.12-2.04 (m, 1H), 1.71-1.66 (m, 1H), 1.49-1.43 (m, 1H)

***trans*-2-(3,4,5-trimethoxyphenyl)cyclopropanecarbaldehyde (1f)**

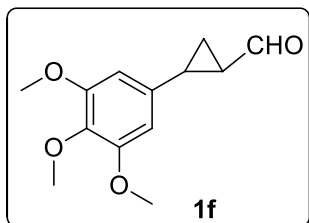

**<sup>1</sup>H NMR (400 MHz):**  $\delta$  9.31 (d,  $J$  = 4.5 Hz, 1H), 6.33 (s, 2H), 3.84 (s, 6H), 3.81 (s, 3H), 2.62-2.56 (m, 1H), 2.18-2.11 (m, 1H), 1.73-1.67 (m, 1H), 1.53-1.47 (m, 1H)

***trans*-2-(furan-2-yl)cyclopropane-1-carbaldehyde (1g)**

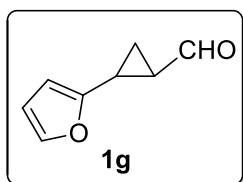

**<sup>1</sup>H NMR (400 MHz):**  $\delta$  9.36 (d,  $J$  = 4.3 Hz, 1H), 7.27-7.25 (m, 1H), 6.30-6.28 (m, 1H), 6.10 (d,  $J$  = 3.3 Hz, 1H), 2.65-2.59 (m, 1H), 2.32-2.26 (m, 1H), 1.69-1.64 (m, 1H), 1.62-1.56 (m, 1H).

***trans*-2-(thiophen-2-yl)cyclopropane-1-carbaldehyde (1h)**

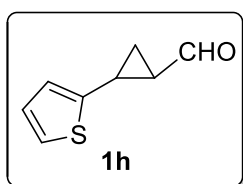

**<sup>1</sup>H NMR (400 MHz):**  $\delta$  9.38 (d,  $J$  = 4.1 Hz, 1H), 7.13-7.11 (m, 1H), 6.92-6.90 (m, 1H), 6.85-6.84 (m, 1H), 2.84-2.78 (m, 1H), 2.25-2.20 (m, 1H), 1.79-1.74 (m, 1H), 1.55-1.50 (m, 1H).

**3. General procedure for the preparation of 2-substituted nitrones (2)<sup>2</sup>**

Aldehyde (1.0 equiv), *N*-methylhydroxylamine hydrochloride (2.0 equiv), Na<sub>2</sub>CO<sub>3</sub> (2.2 equiv), and Na<sub>2</sub>SO<sub>4</sub> (0.5 equiv) were added to a mortar and ground until completion. Et<sub>2</sub>O was added, the mixture filtered, and concentrated in vacuo.

**(*E*)-*N*-(2-methylbenzylidene)methanamine oxide (2a)**

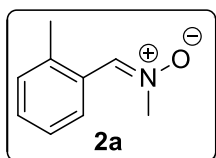

**<sup>1</sup>H NMR (400 MHz):**  $\delta$  9.08-9.05 (m, 1H), 7.48 (s, 1H), 7.25-7.13 (m, 3H), 3.85 (s, 3H), 2.32 (s, 3H)

**(*E*)-*N*-(2-methoxybenzylidene)methanamine oxide (2b)**

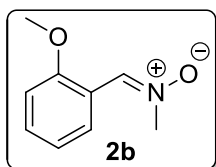

**<sup>1</sup>H NMR (400 MHz):**  $\delta$  9.21-9.21 (m, 1H), 7.81 (s, 1H), 7.37-7.33 (m, 1H), 7.02-6.99 (m, 1H), 6.87-6.85 (m, 1H), 3.86 (s, 3H), 3.83 (s, 3H)

**(*E*)-*N*-(2-fluorobenzylidene)methanamine oxide (2c)**

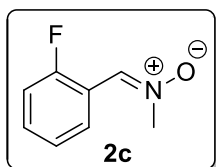

**<sup>1</sup>H NMR (400 MHz):**  $\delta$  9.24-9.20 (m, 1H), 7.66 (s, 1H), 7.40-7.35 (m, 1H), 7.23-7.20 (m, 1H), 7.10-7.05 (m, 1H), 3.91 (s, 3H)

**(E)-N-(2-bromobenzylidene)methanamine oxide (2d)**

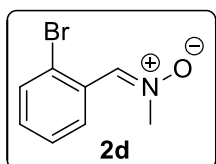

**<sup>1</sup>H NMR (400 MHz):**  $\delta$  9.29-9.27 (m, 1H), 7.85 (s, 1H), 7.63-7.60 (m, 1H), 7.42-7.38 (m, 1H), 7.27-7.23 (m, 1H), 3.94 (s, 3H)

**(E)-N-(2-((tert-butyldimethylsilyl)oxy)benzylidene)methanamine oxide (2e)**

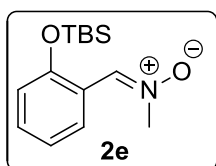

**<sup>1</sup>H NMR (400 MHz):**  $\delta$  9.15-9.13 (m, 1H), 7.71 (s, 1H), 7.25-7.21 (m, 1H), 7.00-6.97 (m, 1H), 6.78 (d,  $J=8.2$  Hz, 1H), 3.83 (s, 3H), 0.98 (s, 9H), 0.20 (s, 6H)

**(E)-N-(2-hydroxybenzylidene)methanamine oxide (3a)**

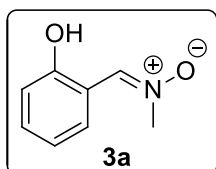

**<sup>1</sup>H NMR (400 MHz):**  $\delta$  12.35 (s, 1H), 7.50 (s, 1H), 7.40-7.36 (m, 1H), 7.04 (dd,  $J=7.7$  Hz, 1.8 Hz, 1H), 6.95 (d,  $J=8.6$  Hz, 1H), 6.85-6.81 (m, 1H), 3.86 (s, 3H)

**(E)-N-(2-hydroxy-5-methylbenzylidene)methanamine oxide (3b)**

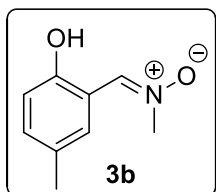

**<sup>1</sup>H NMR (400 MHz):**  $\delta$  12.10 (s, 1H), 7.44 (s, 1H), 7.18 (dd,  $J=8.2$  Hz, 2.2 Hz, 1H), 6.85 (d,  $J=8.2$  Hz, 1H), 6.80-6.79 (m, 1H), 3.83 (s, 3H), 2.23 (s, 3H)

**(E)-N-(5-chloro-2-hydroxybenzylidene)methanamine oxide (3c)**

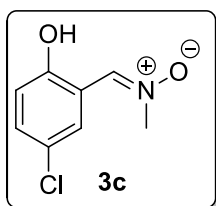

**<sup>1</sup>H NMR (400 MHz):**  $\delta$  12.15 (s, 1H), 7.46 (s, 1H), 7.32 (dd, J=8.7 Hz, 2.3 Hz, 1H), 7.02 (d, J=2.4 Hz, 1H), 6.91 (d, J=8.8 Hz, 1H), 3.89 (s, 3H)

**(E)-N-(5-bromo-2-hydroxybenzylidene)methanamine oxide (3d)**

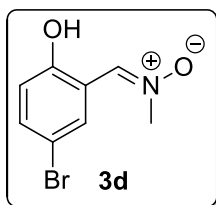

**<sup>1</sup>H NMR (400 MHz):**  $\delta$  12.24 (s, 1H), 7.44-7.42 (m, 2H), 7.15 (d, J=2.7 Hz, 1H), 6.83 (d, J=8.7 Hz, 1H), 3.87 (s, 3H)

**(E)-N-(2-hydroxy-4-methoxybenzylidene)methanamine oxide (3e)**

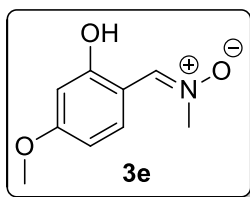

**<sup>1</sup>H NMR (400 MHz):**  $\delta$  13.42 (s, 1H), 7.35 (s, 1H), 6.91 (d, J=8.5 Hz, 1H), 6.44-6.39 (m, 2H), 3.81 (s, 3H), 3.80 (s, 3H)

**(E)-N-(2-hydroxy-3-methoxybenzylidene)methanamine oxide (3f)**

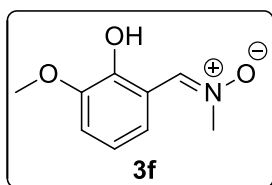

**<sup>1</sup>H NMR (400 MHz):**  $\delta$  12.49 (s, 1H), 7.53 (s, 1H), 6.95 (d, J=7.9 Hz, 1H), 6.80-6.76 (m, 1H), 6.66 (d, J=8.0 Hz, 1H), 3.86 (s, 3H), 3.85 (s, 3H)



## 4. Optimization Study

**Table S1:** Optimization of the reaction conditions

| entry           | catalyst | solvent            | additive                       | yield <sup>b</sup> (%) | <i>er</i> <sup>c</sup> | <i>dr</i> <sup>d</sup> |
|-----------------|----------|--------------------|--------------------------------|------------------------|------------------------|------------------------|
| 1               | I        | CCl <sub>4</sub>   | -                              | 45                     | 75:25                  | 4:1                    |
| 2               | I        | DCM                | -                              | n.r. <sup>e</sup>      | -                      | -                      |
| 3               | I        | DCE                | -                              | n.r. <sup>e</sup>      | -                      | -                      |
| 4               | I        | CHCl <sub>3</sub>  | -                              | n.r. <sup>e</sup>      | -                      | -                      |
| 5               | I        | CH <sub>3</sub> CN | -                              | n.r. <sup>e</sup>      | -                      | -                      |
| 6               | I        | Toluene            | -                              | n.r. <sup>e</sup>      | -                      | -                      |
| 7               | I        | CCl <sub>4</sub>   | PhCO <sub>2</sub> H            | c.m. <sup>f</sup>      | -                      | -                      |
| 8               | I        | CCl <sub>4</sub>   | TfOH                           | c.m. <sup>f</sup>      | -                      | -                      |
| 9               | I        | CCl <sub>4</sub>   | TFA                            | c.m. <sup>f</sup>      | -                      | -                      |
| 10              | I        | CCl <sub>4</sub>   | Et <sub>3</sub> N              | 35                     | 56:44                  | 3:2                    |
| 11              | I        | CCl <sub>4</sub>   | DABCO                          | 36                     | 57:43                  | 3:1                    |
| 12              | I        | CCl <sub>4</sub>   | DMAP                           | 40                     | 53:47                  | 2.5:1                  |
| 13              | I        | CCl <sub>4</sub>   | K <sub>2</sub> CO <sub>3</sub> | 10                     | 74:26                  | 1.2:1                  |
| 14              | II       | CCl <sub>4</sub>   | -                              | 40                     | 62:38                  | 3:1                    |
| 15              | III      | CCl <sub>4</sub>   | -                              | Trace                  | -                      | -                      |
| 16              | IV       | CCl <sub>4</sub>   | -                              | 25                     | 60:40                  | 4:1                    |
| 17              | V        | CCl <sub>4</sub>   | -                              | n.r. <sup>e</sup>      | -                      | -                      |
| 18              | VI       | CCl <sub>4</sub>   | -                              | n.r. <sup>e</sup>      | -                      | -                      |
| 19 <sup>g</sup> | I        | CCl <sub>4</sub>   | -                              | 35                     | 55:45                  | 3:1                    |
| 20 <sup>h</sup> | I        | CCl <sub>4</sub>   | -                              | 35                     | 75:25                  | 4:1                    |
| 21 <sup>i</sup> | I        | CCl <sub>4</sub>   | -                              | 30                     | 77:23                  | 4:1                    |
| 22 <sup>j</sup> | I        | CCl <sub>4</sub>   | -                              | 35                     | 55:45                  | 1.1:1                  |

<sup>a</sup>Unless otherwise all the reactions were carried out with 1 equiv. of 1a, 1.5 equiv. of 2a, 40 mol% of catalyst in the presence of 4 Å molecular sieves at refluxing condition for 10 h; <sup>b</sup>isolated yield by column chromatography; <sup>c</sup>determined by chiral HPLC analysis; <sup>d</sup>determined from crude nmr; <sup>e</sup>no reaction; <sup>f</sup>complex mixture; <sup>g</sup>reaction performed at room temperature for 6 d; <sup>h</sup>30 mol% catalyst taken; <sup>i</sup>50 mol% catalyst taken, <sup>j</sup>unsubstituted nitrone was used.

## 5. Representative procedure and substrate scope for the (3+3)-cycloaddition between cyclopropane carbaldehydes and 2-substituted nitrones

To a round-bottom flask equipped with a magnetic stir bar was charged with cyclopropane carbaldehyde (1 equiv.), 2-substituted nitrone (1.5 equiv.), activated 4 Å MS (200 mol%), and Jørgensen-Hayashi Catalyst I (0.4 equiv.) under nitrogen atmosphere. CCl<sub>4</sub> was added as a

solvent to the reaction mixture and was stirred under reflux conditions for 10-12 hours. After the completion of the reaction (as monitored by TLC), the reaction mixture was passed through a small pad of Celite, and the solvent was removed under reduced pressure by a rotary evaporator. Then the crude product was further purified by column chromatography on silica gel with EtOAc/hexane as eluent.

Racemic products were prepared according to the representative procedure 5 by using the racemic catalyst.

**(6*R*)-6-(4-methoxyphenyl)-2-methyl-3-(*o*-tolyl)-1,2-oxazinane-4-carbaldehyde (4aa)**

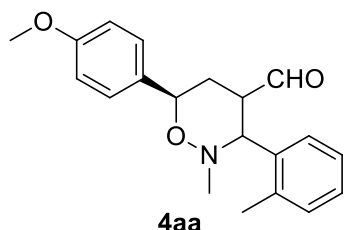

Prepared according to **GP 3. 1a** (0.044 g, 0.25 mmol), **2a** (0.036 g, 0.37 mmol), **4aa** (0.036 g, 0.11 mmol); Yellowish sticky liquid, 44% overall yield;  $[\alpha]_D^{25} = -86.07$  ( $c = 0.7$ ,  $\text{CHCl}_3$ ); 75:25 er of major diastereomer was determined by chiral HPLC analysis, [Chiralpak IC, hexane/*i*-PrOH = 90/10, 0.5 mL/min,  $t_R$  (minor) = 9.36 min,  $t_R$  (major) = 11.49 min];  **$^1\text{H NMR}$  (400 MHz):**  $\delta$  9.40 (d,  $J = 1.8$  Hz, 1H), 7.51 (d,  $J = 7.7$  Hz, 1H), 7.37 (d,  $J = 8.6$  Hz, 2H), 7.22-7.17 (m, 1H), 6.91 (d,  $J = 8.6$  Hz, 2H), 5.00 (dd,  $J = 11.8, 1.8$  Hz, 1H), 3.93 (d,  $J = 10.5$  Hz, 1H), 3.81 (m, 1H), 3.34-3.28 (m, 1H), 2.43 (s, 3H), 2.41 (s, 3H), 2.18-2.15 (m, 1H), 1.99-1.89 (m, 1H);  **$^{13}\text{C NMR}$  (100 MHz):**  $\delta$  201.7, 159.6, 136.8, 136.6, 132.2, 130.8, 128.1, 128.0, 127.8, 127.3, 127.0, 114.0, 79.3, 65.7, 55.8, 55.4, 43.2, 31.9, 20.5; **HRMS (ESI, Q-TOF)  $m/z$ :**  $[\text{M}+\text{H}]^+$  calculated for  $\text{C}_{20}\text{H}_{24}\text{NO}_3$  326.1756, Found 326.1751

**(6*R*)-6-(4-(benzyloxy)phenyl)-2-methyl-3-(*o*-tolyl)-1,2-oxazinane-4-carbaldehyde (4ba)**

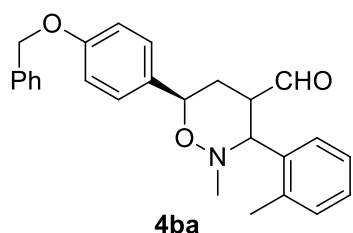

Prepared according to **GP 3. 1a** (0.063 g, 0.25 mmol), **2a** (0.056 g, 0.37 mmol), **4ba** (0.036 g, 0.09 mmol); Yellowish sticky liquid, 36% overall yield;  $[\alpha]_D^{25} = -49.43$  ( $c = 0.7$ ,  $\text{CHCl}_3$ ); 73.5:26.5 er of major diastereomer was determined by chiral HPLC analysis, [Chiralpak IC, hexane/*i*-PrOH = 90/10, 0.5 mL/min,  $t_R$  (minor) = 17.60 min,  $t_R$  (major) = 18.24 min];  **$^1\text{H NMR}$  (400 MHz):**  $\delta$  9.39 (d,  $J = 1.8$  Hz, 1H), 7.50-7.49 (m, 1H), 7.43-7.35 (m, 8H), 7.19-7.16 (m, 2H), 6.98 (d,  $J = 8.7$  Hz, 2H), 5.07 (s, 2H), 4.99 (dd,  $J = 11.5, 1.8$  Hz, 1H), 3.92 (d,  $J = 10.5$  Hz, 1H), 3.33-3.27 (m, 1H), 2.42 (s, 3H), 2.40 (s, 3H), 2.18-2.13 (m, 1H), 1.98-1.89 (m, 1H);  **$^{13}\text{C NMR}$  (100 MHz):**  $\delta$  201.7, 158.8, 136.9, 136.8, 136.5, 132.4, 130.7, 128.7, 128.1, 128.0, 127.9, 127.5, 127.2, 127.0, 114.9, 79.3, 70.0, 65.7, 55.8, 43.1, 31.8, 20.5; **HRMS (ESI, Q-TOF)  $m/z$ :**  $[\text{M}+\text{H}]^+$  calculated for  $\text{C}_{26}\text{H}_{28}\text{NO}_3$  402.2069, Found 402.2068

**(6*R*)-6-(3,4-dimethoxyphenyl)-2-methyl-3-(*o*-tolyl)-1,2-oxazinane-4-carbaldehyde (4ca)**

Prepared according to **GP 3. 1c** (0.052 g, 0.25 mmol), **2a** (0.056 g, 0.37 mmol), **4ca** (0.048 g, 0.13 mmol); Yellowish sticky liquid, 54% overall yield;  $[\alpha]_D^{25} = -60.25$  ( $c = 1.0$ ,  $\text{CHCl}_3$ ); 79.5:20.5 er of major diastereomer was determined by chiral HPLC analysis, [Chiralpak IC,

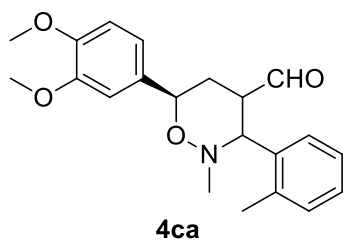

hexane/*i*-PrOH = 80/20, 1.0 mL/min,  $t_R$  (major) = 28.98 min,  $t_R$  (minor) = 36.04 min];  $^1\text{H NMR}$  (400 MHz):  $\delta$  9.41 (d,  $J$  = 1.4 Hz, 1H), 7.51 (d,  $J$  = 7.7 Hz, 1H), 7.28-7.17 (m, 4H), 6.99-6.97 (m, 2H), 6.88-6.86 (m, 1H), 4.99 (dd,  $J$  = 11.5, 1.9 Hz, 1H), 3.95 (s, 1H), 3.92 (s, 3H), 3.88 (s, 3H), 3.35-3.28 (m, 1H), 2.44 (s, 3H), 2.42 (s, 3H), 2.20-2.15 (m, 1H), 2.00-1.91 (m, 1H);  $^{13}\text{C NMR}$  (100 MHz):  $\delta$  201.8, 149.0, 136.8, 136.5, 132.4, 130.8, 128.0, 127.2, 127.0, 119.2, 111.0, 110.0, 79.6, 65.7, 56.0, 56.0, 55.8, 43.2, 31.8, 20.5; **HRMS (ESI, Q-TOF)**  $m/z$ :  $[\text{M}+\text{H}]^+$  calculated for  $\text{C}_{21}\text{H}_{26}\text{NO}_4$  356.1862, Found 356.1858

**(6R)-6-(benzo[*d*][1,3]dioxol-5-yl)-2-methyl-3-(*o*-tolyl)-1,2-oxazinane-4-carbaldehyde (4ea)**

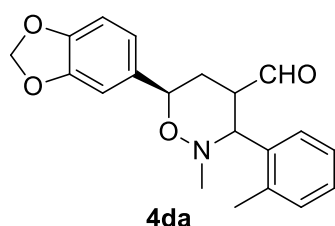

Prepared according to **GP 3. 1d** (0.048 g, 0.25 mmol), **2a** (0.056 g, 0.37 mmol), **4da** (0.024 g, 0.07 mmol); Yellowish sticky liquid, 28% overall yield;  $[\alpha]_D^{25} = -52.48$  ( $c = 0.7$ ,  $\text{CHCl}_3$ ); 62.5:37.5 er of major diastereomer was determined by chiral HPLC analysis, [Chiralpak IC, hexane/*i*-PrOH = 90/10, 0.5 mL/min,  $t_R$  (minor) = 16.89 min,  $t_R$  (major) = 18.63 min];  $^1\text{H NMR}$  (400 MHz):  $\delta$  9.39 (d,  $J$  = 1.4 Hz, 1H), 7.49 (d,  $J$  = 7.3 Hz, 1H), 7.23-7.16 (m, 3H), 6.94-6.93 (m, 1H), 6.90-6.88 (m, 1H), 6.81-6.79 (m, 1H), 5.96-5.93 (m, 2H), 4.95 (dd,  $J$  = 11.4, 2.1 Hz, 1H), 3.91 (d,  $J$  = 10.5 Hz, 1H), 3.32-3.26 (m, 1H), 2.42 (s, 3H), 2.40 (s, 3H), 2.17-2.12 (m, 1H), 1.94-1.84 (m, 1H);  $^{13}\text{C NMR}$  (100 MHz):  $\delta$  201.7, 147.9, 147.6, 136.7, 136.6, 133.9, 130.8, 128.0, 127.3, 127.0, 120.3, 108.3, 107.4, 101.2, 79.5, 65.7, 55.8, 43.2, 32.1, 20.5; **HRMS (ESI, Q-TOF)**  $m/z$ :  $[\text{M}+\text{H}]^+$  calculated for  $\text{C}_{20}\text{H}_{22}\text{NO}_4$  340.1549, Found 340.1545

**(6R)-6-(3-ethoxy-4-methoxyphenyl)-2-methyl-3-(*o*-tolyl)-1,2-oxazinane-4-carbaldehyde (4ea)**

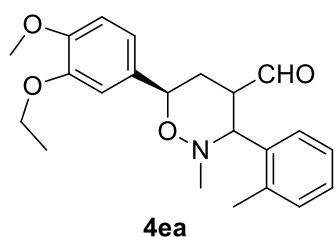

Prepared according to **GP 3. 1e** (0.055 g, 0.25 mmol), **2a** (0.056 g, 0.37 mmol), **4ea** (0.032 g, 0.08 mmol); Yellowish sticky liquid, 35% overall yield;  $[\alpha]_D^{25} = -84.16$  ( $c = 0.4$ ,  $\text{CHCl}_3$ ); 82.5:17.5 er of major diastereomer was determined by chiral HPLC analysis, [Chiralpak IC, hexane/*i*-PrOH = 80/20, 1.0 mL/min,  $t_R$  (major) = 17.88 min,  $t_R$  (minor) = 23.56 min];  $^1\text{H NMR}$  (400 MHz):  $\delta$  9.40 (d,  $J$  = 1.5 Hz, 1H), 7.50 (d,  $J$  = 7.2 Hz, 1H), 7.23-7.16 (m, 3H), 6.98-6.96 (m, 2H), 6.87-6.85 (m, 1H), 4.97 (dd,  $J$  = 11.4, 2.0 Hz, 1H), 4.14 (q,  $J$  = 7.0 Hz, 2H), 3.93 (d,  $J$  = 10.0 Hz, 1H), 3.87 (s, 3H), 3.33-3.28 (m, 1H), 2.43 (s, 3H), 2.41 (s, 3H), 2.19-2.14 (m, 1H), 1.99-1.89 (m, 1H), 1.48 (t,  $J$  = 6.8 Hz, 3H);  $^{13}\text{C NMR}$  (100 MHz):  $\delta$  201.9, 149.3, 148.4, 136.8, 136.6, 132.4, 130.8, 128.0, 127.2, 127.0, 119.2, 111.4, 111.3, 79.6, 65.7, 64.4, 56.1, 55.8, 43.2, 31.8, 20.5, 14.9; **HRMS (ESI, Q-TOF)**  $m/z$ :  $[\text{M}+\text{H}]^+$  calculated for  $\text{C}_{22}\text{H}_{28}\text{NO}_4$  370.2018, Found 370.2010

**(6*R*)-2-methyl-3-(*o*-tolyl)-6-(3,4,5-trimethoxyphenyl)-1,2-oxazinane-4-carbaldehyde (4fa)**

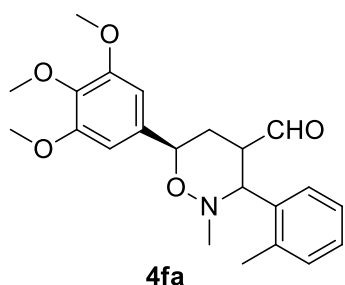

Prepared according to **GP 3**. **1f** (0.060 g, 0.25 mmol), **2a** (0.056 g, 0.37 mmol), **4fa** (0.036 g, 0.09 mmol); Yellowish sticky liquid, 37% overall yield;  $[\alpha]_D^{25} = -109.54$  ( $c = 0.4$ ,  $\text{CHCl}_3$ ); 62.5:37.5 er of major diastereomer was determined by chiral HPLC analysis, [Chiralpak IC, hexane/*i*-PrOH = 60/40, 1.0 mL/min,  $t_R$  (minor) = 10.74 min,  $t_R$  (major) = 21.22 min];  **$^1\text{H}$  NMR (400 MHz)**:  $\delta$  9.40 (d,  $J = 1.3$  Hz, 1H), 7.51 (d,  $J = 7.6$  Hz, 1H), 7.28-7.18 (m, 3H), 6.65 (s, 2H), 4.98 (dd,  $J = 11.5$ , 2.2 Hz, 1H), 3.95 (d,  $J = 10.0$  Hz, 1H), 3.90 (s, 6H), 3.84 (s, 3H), 3.35-3.28 (m, 1H), 2.45 (s, 3H), 2.42 (s, 3H), 2.20-2.16 (m, 1H), 1.99-1.89 (m, 1H);  **$^{13}\text{C}$  NMR (100 MHz)**:  $\delta$  201.8, 153.4, 137.9, 136.7, 136.5, 135.5, 130.8, 128.0, 127.2, 127.0, 103.8, 80.0, 65.7, 60.9, 56.2, 55.7, 43.2, 32.0, 20.5; **HRMS (ESI, Q-TOF)**  $m/z$ :  $[\text{M}+\text{H}]^+$  calculated for  $\text{C}_{22}\text{H}_{28}\text{NO}_5$  386.1967, Found 386.1964

**(6*R*)-6-(furan-2-yl)-2-methyl-3-(*o*-tolyl)-1,2-oxazinane-4-carbaldehyde (4ka)**

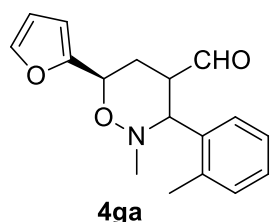

Prepared according to **GP 3**. **1g** (0.034 g, 0.25 mmol), **2a** (0.056 g, 0.37 mmol), **4ga** (0.036 g, 0.12 mmol); Yellowish sticky liquid, 45% overall yield; Yellowish sticky liquid, 45% overall yield;  $[\alpha]_D^{25} = -45.86$  ( $c = 0.6$ ,  $\text{CHCl}_3$ ); 60.5:39.5 er of major diastereomer was determined by chiral HPLC analysis, [Chiracel ASH, hexane/*i*-PrOH = 90/10, 0.5 mL/min,  $t_R$  (major) = 6.93 min,  $t_R$  (minor) = 8.16 min];  **$^1\text{H}$  NMR (400 MHz)**:  $\delta$  9.37 (d,  $J = 1.3$  Hz, 1H), 7.49 (d,  $J = 7.5$  Hz, 1H), 7.44-7.43 (m, 1H), 7.24-7.16 (m, 3H), 6.43-6.42 (m, 1H), 6.38-6.37 (m, 1H), 5.12-5.09 (m, 1H), 3.92 (d,  $J = 10.5$  Hz, 1H), 3.29-3.23 (m, 1H), 2.42 (s, 3H), 2.38 (s, 3H), 2.19-2.15 (m, 2H);  **$^{13}\text{C}$  NMR (100 MHz)**:  $\delta$  201.5, 152.4, 142.9, 136.5, 130.8, 128.1, 127.2, 127.0, 110.4, 108.4, 73.0, 65.7, 55.4, 43.1, 28.7, 20.5; **HRMS (ESI, Q-TOF)**  $m/z$ :  $[\text{M}+\text{H}]^+$  calculated for  $\text{C}_{17}\text{H}_{20}\text{NO}_3$  286.1443, Found 286.1437

**(6*R*)-2-methyl-6-(thiophen-2-yl)-3-(*o*-tolyl)-1,2-oxazinane-4-carbaldehyde (4la)**

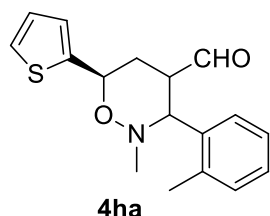

Prepared according to **GP 3**. **1h** (0.038 g, 0.25 mmol), **2a** (0.056 g, 0.37 mmol), **4ha** (0.025 g, 0.08 mmol); Yellowish sticky liquid, 28% overall yield;  $[\alpha]_D^{25} = -46.49$  ( $c = 0.5$ ,  $\text{CHCl}_3$ ); 79:21 er of major diastereomer was determined by chiral HPLC analysis, [Chiracel ASH, hexane/*i*-PrOH = 90/10, 0.5 mL/min,  $t_R$  (major) = 7.01 min,  $t_R$  (minor) = 8.07 min];  **$^1\text{H}$  NMR (400 MHz)**:  $\delta$  9.38 (d,  $J = 1.3$  Hz, 1H), 7.49 (d,  $J = 7.6$  Hz, 1H), 7.32-7.31 (m, 1H), 7.24-7.17 (m, 3H), 7.12-7.11 (m, 1H), 7.02-7.00 (m, 1H), 5.28 (dd,  $J = 11.6$ , 2.0 Hz, 1H), 3.94 (d,  $J = 10.6$  Hz, 1H), 3.33-3.26 (m, 1H), 2.44 (s, 3H), 2.39 (s, 3H), 2.35-2.30 (m, 1H), 2.08-1.99 (m, 1H);  **$^{13}\text{C}$  NMR (100 MHz)**:  $\delta$  201.5, 142.5, 136.6, 130.8, 128.1, 127.2, 127.0, 126.7, 125.7, 125.3, 75.3, 65.7, 55.6, 43.1, 32.4, 20.5; **HRMS (ESI, Q-TOF)**  $m/z$ :  $[\text{M}+\text{H}]^+$  calculated for  $\text{C}_{17}\text{H}_{20}\text{NO}_2\text{S}$  302.1215, Found 302.1211

**(6R)-3-(2-methoxyphenyl)-6-(4-methoxyphenyl)-2-methyl-1,2-oxazinane-4-carbaldehyde (4ab)**

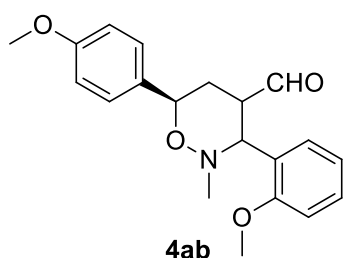

Prepared according to **GP 3. 1a** (0.044 g, 0.25 mmol), **2b** (0.061 g, 0.37 mmol), **4ab** (0.029 g, 0.08 mmol); Yellowish sticky liquid, 34% overall yield;  $[\alpha]_{\text{D}}^{25} = -19.50$  ( $c = 0.6$ ,  $\text{CHCl}_3$ ); 62:38 er of major diastereomer was determined by chiral HPLC analysis, [Chiralpak IC, hexane/*i*-PrOH = 95/5, 1.0 mL/min,  $t_{\text{R}}$  (minor) = 14.93 min,  $t_{\text{R}}$  (major) = 16.06 min];  **$^1\text{H}$  NMR (400 MHz):**  $\delta$  9.37 (d,  $J = 1.4$  Hz, 1H), 7.48-7.47 (m, 1H), 7.36 (d,  $J = 8.2$  Hz, 2H), 7.30-7.27 (m, 1H), 7.03-6.99 (m, 1H), 6.92-6.89 (m, 3H), 4.96 (dd,  $J = 11.4, 2.3$  Hz, 1H), 4.26 (d,  $J = 10.2$  Hz, 1H), 3.84 (m, 3H), 3.81 (s, 3H), 3.09-3.04 (m, 1H), 2.47 (s, 3H), 2.12-2.07 (m, 1H), 2.01-1.92 (m, 1H);  **$^{13}\text{C}$  NMR (100 MHz):**  $\delta$  202.3, 159.6, 157.1, 132.3, 129.2, 128.1, 121.5, 114.0, 110.8, 79.2, 61.7, 55.6, 55.4, 43.6, 31.8; **HRMS (ESI, Q-TOF)  $m/z$ :**  $[\text{M}+\text{H}]^+$  calculated for  $\text{C}_{20}\text{H}_{24}\text{NO}_4$  342.1705, Found 342.1705

**(6R)-3-(2-fluorophenyl)-6-(4-methoxyphenyl)-2-methyl-1,2-oxazinane-4-carbaldehyde (4ac)**

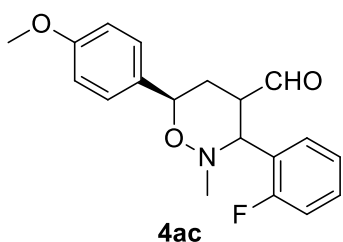

Prepared according to **GP 3. 1a** (0.044 g, 0.25 mmol), **2c** (0.057 g, 0.37 mmol), **4ac** (0.027 g, 0.08 mmol); Yellowish sticky liquid, 32% overall yield;  $[\alpha]_{\text{D}}^{25} = -96.18$  ( $c = 0.3$ ,  $\text{CHCl}_3$ ); 78.5:21.5 er of major diastereomer was determined by chiral HPLC analysis, [Chiralpak IC, hexane/*i*-PrOH = 90/10, 0.5 mL/min,  $t_{\text{R}}$  (minor) = 17.2 min,  $t_{\text{R}}$  (major) = 19.2 min];  **$^1\text{H}$  NMR (400 MHz):**  $\delta$  9.46 (d,  $J = 1.3$  Hz, 1H), 7.50-7.46 (m, 1H), 7.35 (d,  $J = 8.7$  Hz, 2H), 7.32-7.28 (m, 1H), 7.21-7.17 (m, 1H), 7.11-7.06 (m, 1H), 6.91 (d,  $J = 8.8$  Hz, 2H), 4.98 (dd,  $J = 11.4, 1.8$  Hz, 1H), 4.05 (bs, 1H), 3.81 (s, 3H), 3.32-3.16 (m, 1H), 2.47 (s, 3H), 2.19-2.05 (m, 1H), 1.97-1.88 (m, 1H);  **$^{13}\text{C}$  NMR (100 MHz):**  $\delta$  201.1, 162.2, 159.7, 159.5, 132.0, 130.1, 130.0, 128.1, 125.0, 114.0, 55.4, 43.9, 31.9; **HRMS (ESI, Q-TOF)  $m/z$ :**  $[\text{M}+\text{H}]^+$  calculated for  $\text{C}_{19}\text{H}_{21}\text{NO}_3\text{F}$  330.1505, Found 330.1500

**(6R)-3-(2-bromophenyl)-6-(4-methoxyphenyl)-2-methyl-1,2-oxazinane-4-carbaldehyde (4ad)**

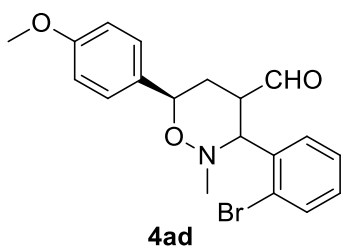

Prepared according to **GP 3. 1a** (0.044 g, 0.25 mmol), **2d** (0.079 g, 0.37 mmol), **4ad** (0.027 g, 0.07 mmol); Yellowish sticky liquid, 27% overall yield;  $[\alpha]_{\text{D}}^{25} = -46.62$  ( $c = 1.0$ ,  $\text{CHCl}_3$ ); 84:16 er of major diastereomer was determined by chiral HPLC analysis, [Chiralpak IC, hexane/*i*-PrOH = 90/10, 0.5 mL/min,  $t_{\text{R}}$  (minor) = 18.93 min,  $t_{\text{R}}$  (major) = 20.87 min];  **$^1\text{H}$  NMR (400 MHz):**  $\delta$  9.47 (d,  $J = 1.8$  Hz, 1H), 7.61 (dd,  $J = 8.2, 1.3$  Hz, 1H), 7.55 (dd,  $J = 7.8, 1.8$  Hz, 1H), 7.40-7.34 (m,

3H), 7.21-7.18 (m, 1H), 6.92 (d,  $J = 8.7$  Hz, 2H), 4.97 (dd,  $J = 11.4, 2.2$  Hz, 1H), 4.34 (d,  $J = 10.7$  Hz, 1H), 3.81 (s, 3H), 3.15-3.08 (m, 1H), 2.47 (s, 3H), 2.16-2.11 (m, 1H), 2.04-1.95 (m, 1H);  $^{13}\text{C}$  NMR (100 MHz):  $\delta$  201.1, 159.7, 137.8, 133.3, 131.9, 129.8, 129.5, 128.5, 128.1, 125.1, 114.0, 79.3, 68.4, 56.1, 55.4, 43.4, 31.6; HRMS (ESI, Q-TOF)  $m/z$ :  $[\text{M}+\text{H}]^+$  calculated for  $\text{C}_{19}\text{H}_{21}\text{NO}_3\text{Br}$  390.0705, Found 390.0700

**(6R)-3-(2-((tert-butyldimethylsilyloxy)phenyl)-6-(4-methoxyphenyl)-2-methyl-1,2-oxazinane-4-carbaldehyde (4ae)**

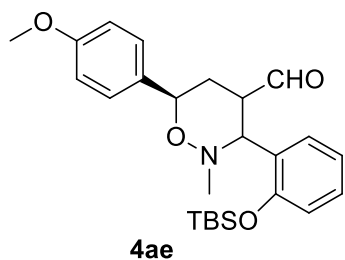

Prepared according to **GP 3. 1a** (0.044 g, 0.25 mmol), **2e** (0.098 g, 0.37 mmol), **4ae** (0.022 g, 0.05 mmol); Yellowish sticky liquid, 20% overall yield;  $[\alpha]_{\text{D}}^{25} = 79.26$  ( $c = 0.8$ ,  $\text{CHCl}_3$ ); 78:22 er of major diastereomer was determined by chiral HPLC analysis, [Chiracel ASH, hexane/*i*-PrOH = 90/10, 0.2 mL/min,  $t_{\text{R}}$  (minor) = 12.90 min,  $t_{\text{R}}$  (major) = 17.74 min];  $^1\text{H}$  NMR (400 MHz):  $\delta$  9.38 (d,  $J = 1.6$  Hz, 1H), 7.49-7.47 (m, 1H), 7.36 (d,  $J = 8.7$  Hz, 2H), 7.19-7.15 (m, 1H), 7.02-6.98 (m, 1H), 6.91 (d,  $J = 8.6$  Hz, 2H), 6.84-6.82 (m, 1H), 4.95 (dd,  $J = 11.5, 1.9$  Hz, 1H), 4.19 (d,  $J = 10.8$  Hz, 1H), 3.81 (s, 3H), 3.10-3.03 (m, 1H), 2.47 (s, 3H), 2.15-2.10 (m, 1H), 1.97-1.87 (m, 1H), 1.03 (s, 9H), 0.28 (s, 6H);  $^{13}\text{C}$  NMR (100 MHz):  $\delta$  202.2, 159.6, 153.6, 132.2, 128.9, 128.7, 128.5, 128.2, 121.9, 118.3, 114.0, 79.0, 62.6, 55.5, 55.4, 43.5, 31.6, 26.0, 18.4, -3.8; HRMS (ESI, Q-TOF)  $m/z$ :  $[\text{M}+\text{H}]^+$  calculated for  $\text{C}_{25}\text{H}_{36}\text{NO}_4\text{Si}$  442.2414, Found 442.2411

**(3R)-3-(4-methoxyphenyl)-1-methyl-1,3,4,10a-tetrahydrochromeno[2,3-*c*][1,2]oxazine (5aa)**

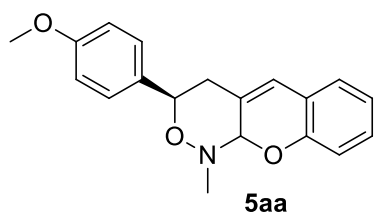

Prepared according to **GP 3. 1a** (0.044 g, 0.25 mmol), **3a** (0.056 g, 0.37 mmol), **5aa** (0.020 g, 0.06 mmol); White solid; 26% overall yield; Melting point: 118-121 °C  $[\alpha]_{\text{D}}^{25} = 256.04$  ( $c = 0.3$   $\text{CHCl}_3$ ); 74:26 er of major diastereomer was determined by chiral HPLC analysis, [Chiralpak IC, hexane/*i*-PrOH = 90/10, 0.5 mL/min,  $t_{\text{R}}$  (major) = 14.61 min,  $t_{\text{R}}$  (minor) = 15.47 min];  $^1\text{H}$  NMR (400 MHz):  $\delta$  7.33 (d,  $J = 8.3$  Hz, 2H), 6.96-6.94 (m, 1H), 6.90 (d,  $J = 8.7$  Hz, 2H), 6.88-6.86 (m, 1H), 6.80-6.78 (m, 1H), 6.30 (s, 1H), 5.18 (s, 1H), 4.92 (dd,  $J = 9.3, 4.3$  Hz, 1H), 3.80 (s, 3H), 2.81 (s, 3H), 2.76-2.73 (m, 1H), 2.71-2.69 (m, 1H);  $^{13}\text{C}$  NMR (100 MHz):  $\delta$  159.7, 151.6, 131.8, 129.8, 128.9, 128.2, 127.9, 126.3, 121.7, 120.1, 119.3, 115.2, 114.0, 92.8, 80.9, 55.4, 41.7, 40.1; HRMS (ESI, Q-TOF)  $m/z$ :  $[\text{M}+\text{H}]^+$  calculated for  $\text{C}_{19}\text{H}_{20}\text{NO}_3$  310.1443, Found 310.1434

**(3R)-3-(4-methoxyphenyl)-1,7-dimethyl-1,3,4,10a-tetrahydrochromeno[2,3-*c*][1,2]oxazine (5ab)**

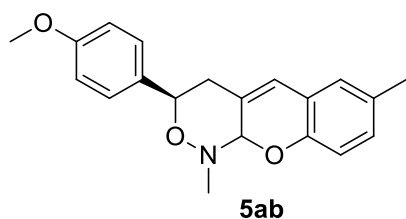

Prepared according to **GP 3. 1a** (0.044 g, 0.25 mmol), **3b** (0.061 g, 0.37 mmol), **5ab** (0.019 g, 0.06 mmol); Colourless sticky liquid, 23% overall yield;  $[\alpha]_D^{25} = 75.25$  ( $c = 0.9$ ,  $\text{CHCl}_3$ ); 60:40 er of major diastereomer was determined by chiral HPLC analysis, [Chiralpak IC, hexane/*i*-PrOH = 90/10, 0.5 mL/min,  $t_R$  (major) = 14.61 min,  $t_R$  (minor) = 15.47 min];  **$^1\text{H NMR}$  (400**

**MHz):**  $\delta$  7.33 (d,  $J = 8.7$  Hz, 2H), 6.91-6.87 (m, 3H), 6.76 (d,  $J = 1.8$  Hz, 1H), 6.70 (d,  $J = 8.2$  Hz, 1H), 6.26 (s, 1H), 5.14 (s, 1H), 4.91 (dd,  $J = 9.8, 4.3$  Hz, 1H), 3.80 (s, 3H), 2.81 (s, 3H), 2.76-2.72 (m, 1H), 2.70-2.69 (m, 1H);  **$^{13}\text{C NMR}$  (100 MHz):**  $\delta$  159.6, 149.5, 131.9, 130.8, 129.8, 129.3, 127.9, 126.7, 119.9, 119.4, 114.9, 92.8, 80.9, 55.4, 41.8, 40.1, 20.6; **HRMS (ESI, Q-TOF) m/z:**  $[\text{M}+\text{H}]^+$  calculated for  $\text{C}_{20}\text{H}_{22}\text{NO}_3$  324.1600, Found 324.1617

**(3R)-7-chloro-3-(4-methoxyphenyl)-1-methyl-1,3,4,10a-tetrahydrochromeno[2,3-c][1,2]oxazine (5ac)**

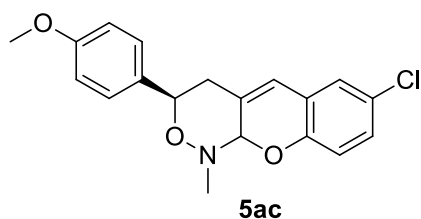

Prepared according to **GP 3. 1a** (0.044 g, 0.25 mmol), **3c** (0.068 g, 0.37 mmol), **5ac** (0.018 g, 0.05 mmol); Colourless sticky liquid, 20% overall yield;  $[\alpha]_D^{25} = 80.98$  ( $c = 0.8$ ,  $\text{CHCl}_3$ ); 67.5:32.5 er of major diastereomer was determined by chiral HPLC analysis, [Chiralpak IC, hexane/*i*-PrOH = 90/10, 0.5 mL/min,  $t_R$  (major) = 13.18 min,  $t_R$  (minor) = 14.45 min];  **$^1\text{H NMR}$**

**(400 MHz):**  $\delta$  7.32 (d,  $J = 8.7$  Hz, 2H), 7.04 (dd,  $J = 8.5, 2.7$  Hz, 1H), 6.93 (d,  $J = 2.5$  Hz, 1H), 6.90 (d,  $J = 8.9$  Hz, 2H), 6.73 (d,  $J = 8.6$  Hz, 1H), 6.24 (s, 1H), 5.17 (s, 1H), 4.91 (dd,  $J = 9.6, 4.5$  Hz, 1H), 3.80 (s, 3H), 2.80 (s, 3H), 2.77-2.73 (m, 1H), 2.71-2.70 (m, 1H);  **$^{13}\text{C NMR}$  (100 MHz):**  $\delta$  159.7, 150.1, 131.5, 131.2, 128.4, 127.9, 126.3, 125.8, 121.5, 118.4, 116.5, 114.0, 92.8, 80.8, 55.4, 41.7, 40.0; **HRMS (ESI, Q-TOF) m/z:**  $[\text{M}+\text{H}]^+$  calculated for  $\text{C}_{19}\text{H}_{19}\text{NO}_3\text{Cl}$  344.1053, Found 344.1080

**(3R)-7-bromo-3-(4-methoxyphenyl)-1-methyl-1,3,4,10a-tetrahydrochromeno[2,3-c][1,2]oxazine (5ad)**

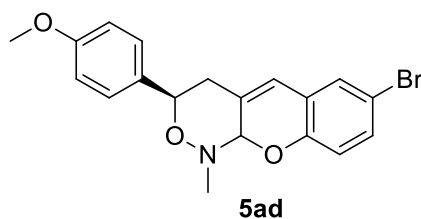

Prepared according to **GP 3. 1a** (0.044 g, 0.25 mmol), **3d** (0.085 g, 0.37 mmol), **5ad** (0.026 g, 0.06 mmol); Colourless sticky liquid, 27% overall yield;  $[\alpha]_D^{25} = 102.64$  ( $c = 0.6$ ,  $\text{CHCl}_3$ ); 65.5:34.5 er of major diastereomer was determined by chiral HPLC analysis, [Chiralpak IC, hexane/*i*-PrOH = 90/10, 0.5 mL/min,  $t_R$  (major) = 12.75 min,  $t_R$  (minor) = 13.74 min];  **$^1\text{H NMR}$**

**(400 MHz):**  $\delta$  7.31 (d,  $J = 8.2$  Hz, 2H), 7.17 (dd,  $J = 8.6, 2.2$  Hz, 1H), 7.07 (d,  $J = 2.3$  Hz, 1H), 6.90 (d,  $J = 8.7$  Hz, 2H), 6.68 (d,  $J = 8.4$  Hz, 1H), 6.23 (s, 1H), 5.17 (s, 1H), 4.90 (dd,  $J = 9.9, 4.1$  Hz, 1H), 3.80 (s, 3H), 2.80 (s, 3H), 2.77-2.73 (m, 1H), 2.71-2.70 (m, 1H);  **$^{13}\text{C NMR}$  (100 MHz):**  $\delta$  159.5, 150.5, 131.2, 131.0, 128.5, 127.8, 121.9, 118.1, 116.8, 113.8,

113.4, 92.6, 80.7, 55.3, 41.6, 39.8; **HRMS (ESI, Q-TOF)** m/z: [M+H]<sup>+</sup> calculated for C<sub>19</sub>H<sub>19</sub>NO<sub>3</sub>Br 388.0548, Found 388.0563

**(3R)-8-methoxy-3-(4-methoxyphenyl)-1-methyl-1,3,4,10a-tetrahydrochromeno[2,3-c][1,2]oxazine (5ae)**

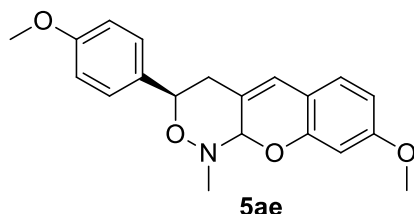

Prepared according to **GP 3. 1a** (0.044 g, 0.25 mmol), **3e** (0.067 g, 0.37 mmol), **5ae** (0.022 g, 0.06 mmol); Colourless sticky liquid, 26% overall yield; [α]<sub>D</sub><sup>25</sup> = 59.82 (c = 0.9, CHCl<sub>3</sub>); 70.5:29.5 er of major diastereomer was determined by chiral HPLC analysis, [Chiralpak IC, hexane/*i*-PrOH = 90/10, 0.5 mL/min, t<sub>R</sub> (minor) = 22.29 min, t<sub>R</sub> (major) = 22.29 min]; **<sup>1</sup>H NMR**

**(400 MHz):** δ 7.32 (d, *J* = 8.6 Hz, 2H), 6.90 (d, *J* = 8.7 Hz, 2H), 6.86 (d, *J* = 8.0 Hz, 1H), 6.43 (dd, *J* = 8.1, 2.2 Hz, 1H), 6.40 (d, *J* = 2.6 Hz, 1H), 6.25 (s, 1H), 5.15 (s, 1H), 4.90 (dd, *J* = 10.2, 3.9 Hz, 1H), 3.80 (s, 3H), 3.76 (s, 3H), 2.80 (s, 3H), 2.74-2.71 (m, 1H), 2.68-2.67 (m, 1H); **<sup>13</sup>C NMR (100 MHz):** δ 160.4, 159.6, 152.7, 131.8, 128.2, 127.9, 126.8, 126.7, 118.9, 113.9, 113.3, 107.3, 101.3, 92.8, 80.0, 55.5, 53.4, 41.7, 39.9; **HRMS (ESI, Q-TOF)** m/z: [M+H]<sup>+</sup> calculated for C<sub>20</sub>H<sub>22</sub>NO<sub>4</sub> 340.1549, Found 340.1549

**(3R)-9-methoxy-3-(4-methoxyphenyl)-1-methyl-1,3,4,10a-tetrahydrochromeno[2,3-c][1,2]oxazine (5af)**

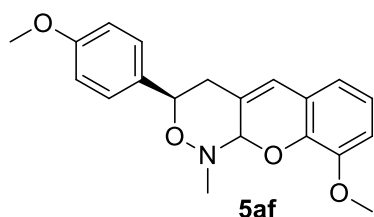

Prepared according to **GP 3. 1a** (0.044 g, 0.25 mmol), **3f** (0.067 g, 0.37 mmol), **5af** (0.021 g, 0.06 mmol); Colourless sticky liquid, 25% overall yield; [α]<sub>D</sub><sup>25</sup> = 125.24 (c = 0.4, CHCl<sub>3</sub>); 68:32 er of major diastereomer was determined by chiral HPLC analysis, [Chiralpak IC, hexane/*i*-PrOH = 90/10, 0.5 mL/min, t<sub>R</sub> (minor) = 22.29 min, t<sub>R</sub> (major) = 22.29 min]; **<sup>1</sup>H NMR (400 MHz):** δ 7.33 (d, *J* = 8.7 Hz,

1H), 6.91-6.87 (m, 3H), 6.76 (d, *J* = 1.8 Hz, 1H), 6.70 (d, *J* = 8.0 Hz, 1H), 6.26 (s, 1H), 5.14 (s, 1H), 4.92 (dd, *J* = 10.0, 4.0 Hz, 1H), 3.80 (s, 3H), 2.81 (s, 3H), 2.76-2.72 (m, 1H), 2.70-2.69 (m, 1H), 2.24 (s, 3H); **<sup>13</sup>C NMR (100 MHz):** δ 159.6, 149.4, 131.8, 130.8, 129.8, 129.3, 127.9, 126.7, 119.8, 119.4, 114.9, 114.0, 92.8, 80.9, 55.4, 41.8, 40.0, 20.6; **HRMS (ESI, Q-TOF)** m/z: [M+H]<sup>+</sup> calculated for C<sub>20</sub>H<sub>22</sub>NO<sub>4</sub> 340.1549, Found 340.1552

## 6. Chemical transformations

**((6R)-6-(4-methoxyphenyl)-2-methyl-3-(*o*-tolyl)-1,2-oxazinan-4-yl)methanol (6a)<sup>3</sup>**



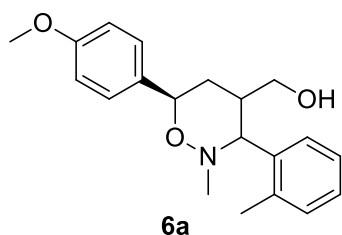

Prepared according to the literature procedure.<sup>3</sup> **4aa** (0.022 g, 0.06 mmol), **NaBH<sub>4</sub>** (0.005 g, 0.12 mmol), **6a** (0.015 g, 0.04 mmol); Colourless liquid, 67% yield; **<sup>1</sup>H NMR (400 MHz):**  $\delta$  7.45 (d,  $J = 7.3$  Hz, 1H), 7.38 (d,  $J = 8.7$  Hz, 2H), 7.24-7.19 (m, 1H), 7.18-7.16 (m, 2H), 6.91 (d,  $J = 8.7$  Hz, 2H), 5.01 (dd,  $J = 11.7, 2.0$  Hz, 1H), 3.81 (s, 3H), 3.70 (d,  $J = 10.5$  Hz, 1H), 3.44 (dd,  $J = 10.5, 3.6$  Hz, 1H), 3.31 (dd,  $J = 10.7, 6.1$  Hz, 1H), 2.41 (s, 3H), 2.40 (s, 3H), 2.38-2.32 (m, 1H), 2.16-2.12 (m, 1H), 1.86-1.77 (m, 1H); **<sup>13</sup>C NMR (100 MHz):**  $\delta$  159.2, 138.1, 136.7, 132.8, 130.3, 128.0, 127.3, 127.0, 126.7, 113.7, 79.7, 67.8, 64.1, 55.2, 45.2, 43.6, 34.9, 29.6, 20.3; **HRMS (ESI, Q-TOF) m/z:**  $[M+H]^+$  calculated for C<sub>20</sub>H<sub>26</sub>NO<sub>3</sub> 328.1913, Found 328.1911

**(E)-ethyl 3-((6R)-6-(4-methoxyphenyl)-2-methyl-3-(o-tolyl)-1,2-oxazinan-4-yl)acrylate (6b)<sup>4</sup>**

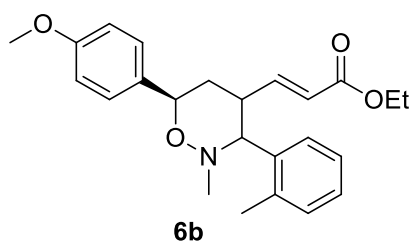

Prepared according to the literature procedure.<sup>4</sup> **4aa** (0.020 g, 0.06 mmol); **6b** (0.018 g, 0.04 mmol), 74% yield; **<sup>1</sup>H NMR (400 MHz):**  $\delta$  7.44 (d,  $J = 8.1$  Hz, 1H), 7.37 (d,  $J = 8.7$  Hz, 2H), 7.24-7.20 (m, 1H), 7.18-7.16 (m, 2H), 6.91 (d,  $J = 8.7$  Hz, 2H), 6.64 (dd,  $J = 16.0, 7.7$  Hz, 1H), 5.61 (dd,  $J = 16.0, 1.3$  Hz, 1H), 5.02 (dd,  $J = 11.4, 1.8$  Hz, 1H), 4.12-4.06 (m, 2H), 3.81 (s, 3H), 3.66 (d,  $J = 10.0$  Hz, 1H), 3.03-2.95 (m, 1H), 2.42 (s, 3H), 2.32 (s, 3H), 2.09-2.04 (m, 1H), 1.93-1.84 (m, 1H), 1.21 (t,  $J = 6.9$  Hz, 3H); **<sup>13</sup>C NMR (100 MHz):**  $\delta$  166.3, 159.5, 147.8, 137.6, 136.5, 132.5, 130.5, 128.1, 127.5, 126.9, 126.7, 122.2, 114.0, 79.4, 69.4, 60.3, 55.4, 46.3, 43.9, 36.8, 20.4, 14.2; **HRMS (ESI, Q-TOF) m/z:**  $[M+H]^+$  calculated for C<sub>24</sub>H<sub>30</sub>NO<sub>4</sub> 396.2175, Found 396.2179

**O-((1R)-2-(chroman-3-yl)-1-(4-methoxyphenyl)ethyl)-N-methylhydroxylamine (7a)<sup>5</sup>**

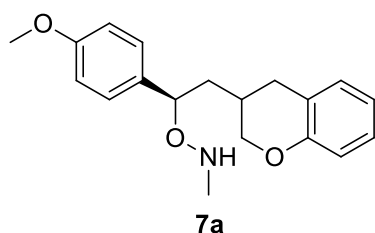

Prepared according to the literature procedure.<sup>5</sup> **5aa** (0.025 g, 0.08 mmol), **7a** (0.018 g, 0.05 mmol), colorless liquid, 71% yield, **<sup>1</sup>H NMR (400 MHz):**  $\delta$  8.32 (bs, 1H), 7.33 (d,  $J = 8.7$  Hz, 2H), 7.17-7.10 (m, 2H), 6.94-6.85 (m, 4H), 5.29 (dd,  $J = 11.7, 2.0$  Hz, 1H), 3.80 (s, 3H), 3.36-3.29 (m, 1H), 2.68 (dd,  $J = 13.8, 6.3$  Hz, 1H), 2.62 (s, 3H), 2.58 (d,  $J = 2.3$  Hz, 2H), 2.30-2.23 (m, 1H), 2.06-1.98 (m, 1H), 1.80-1.77 (m, 1H); **<sup>13</sup>C NMR (100 MHz):**  $\delta$  159.6, 155.8, 132.5, 130.7, 128.2, 128.1, 126.6, 120.6, 117.4, 114.0, 76.5, 58.3, 55.4, 46.4, 35.9, 34.0, 31.4; **HRMS (ESI, Q-TOF) m/z:**  $[M+H]^+$  calculated for C<sub>19</sub>H<sub>24</sub>NO<sub>3</sub> 314.1756, Found 314.1754

**7. NMR, Mass spectra and HPLC data of the compounds**

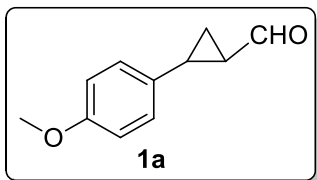

**<sup>1</sup>H-NMR (CDCl<sub>3</sub>, 400MHz) of 1a**

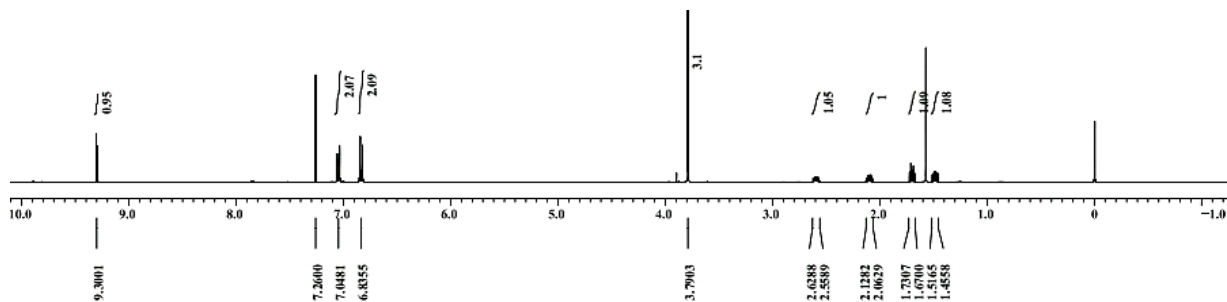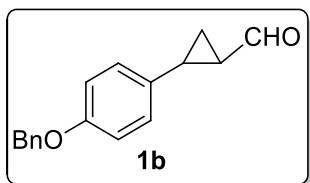

**<sup>1</sup>H-NMR (CDCl<sub>3</sub>, 400MHz) of 1b**

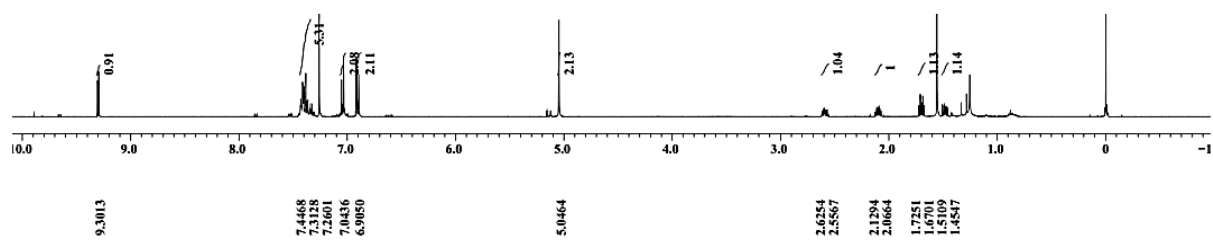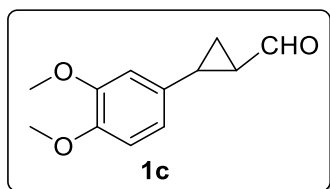

**<sup>1</sup>H-NMR (CDCl<sub>3</sub>, 400MHz) of 1c**

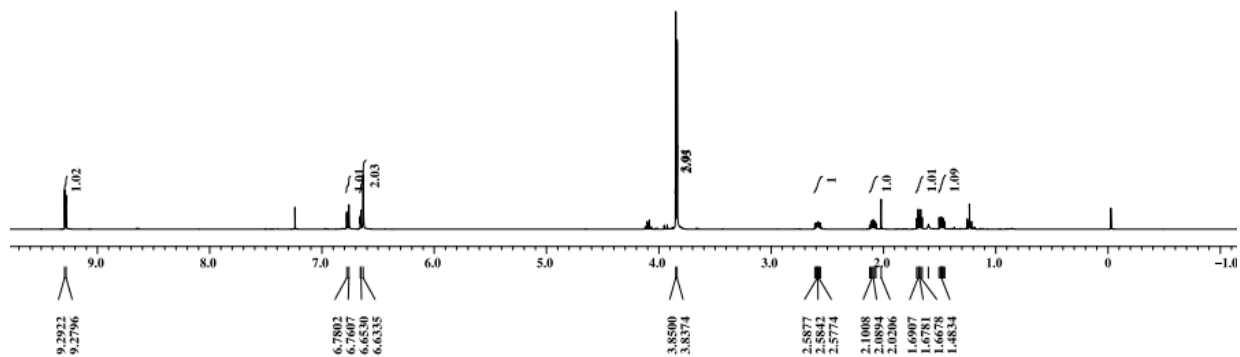

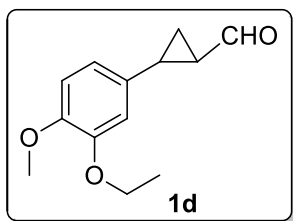

<sup>1</sup>H-NMR (CDCl<sub>3</sub>, 400MHz) of 1d

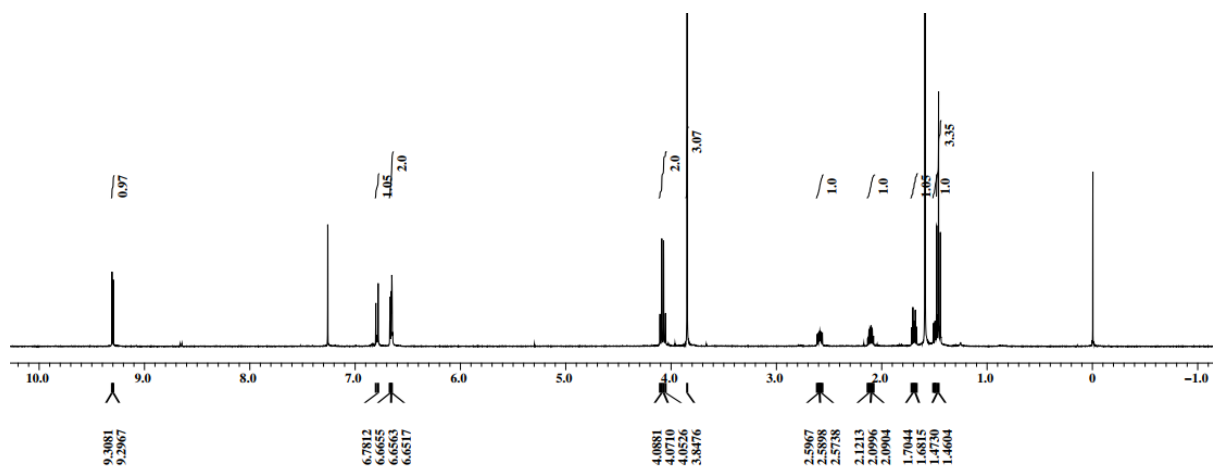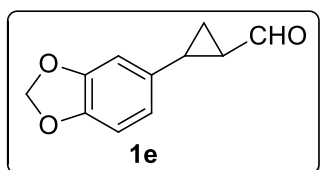

<sup>1</sup>H-NMR (CDCl<sub>3</sub>, 400MHz) of 1e

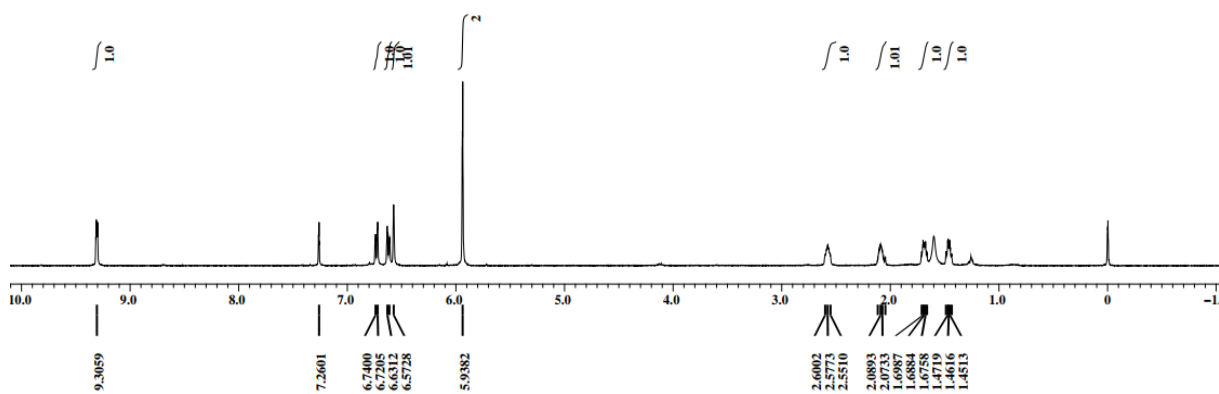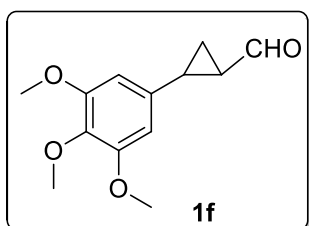

<sup>1</sup>H-NMR (CDCl<sub>3</sub>, 400MHz) of 1f

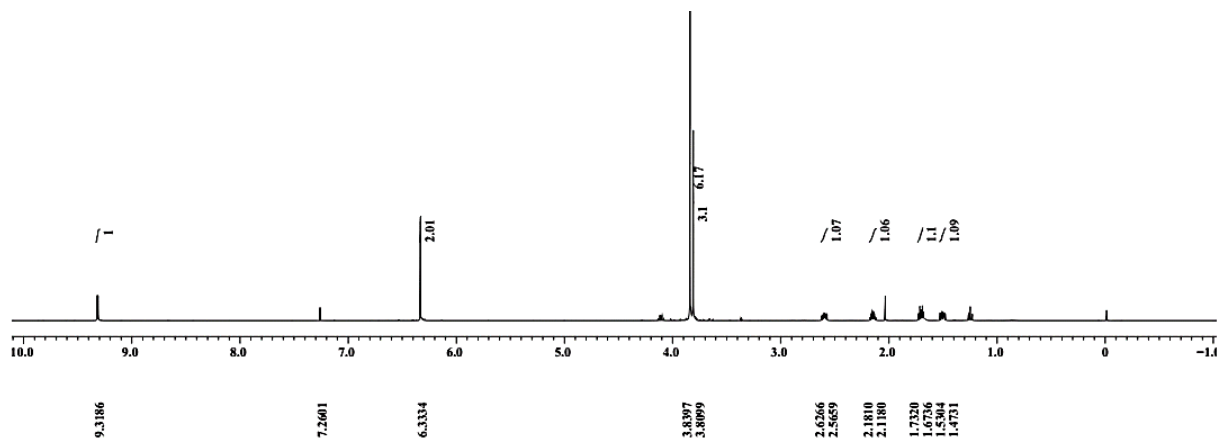

<sup>1</sup>H-NMR (CDCl<sub>3</sub>, 400MHz) of 1i

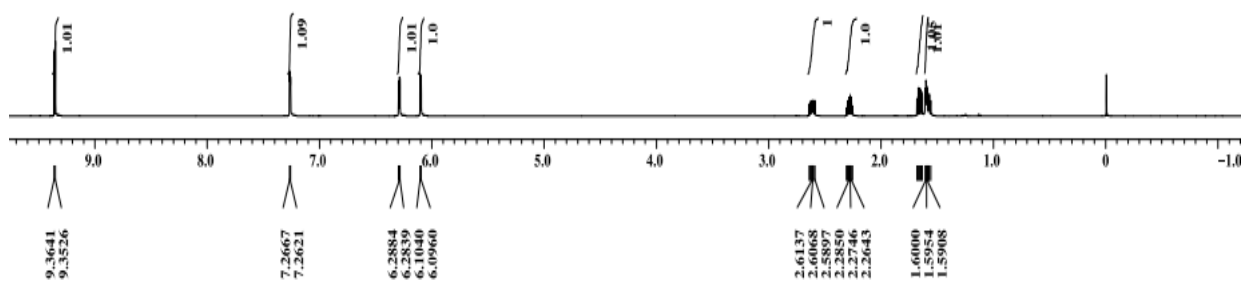

<sup>1</sup>H-NMR (CDCl<sub>3</sub>, 400MHz) of 1j

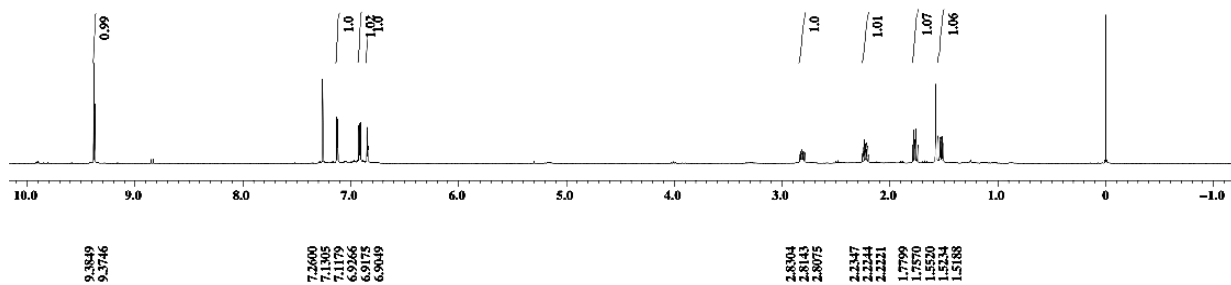

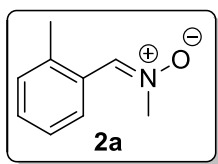

<sup>1</sup>H-NMR (CDCl<sub>3</sub>, 400MHz) of 2a

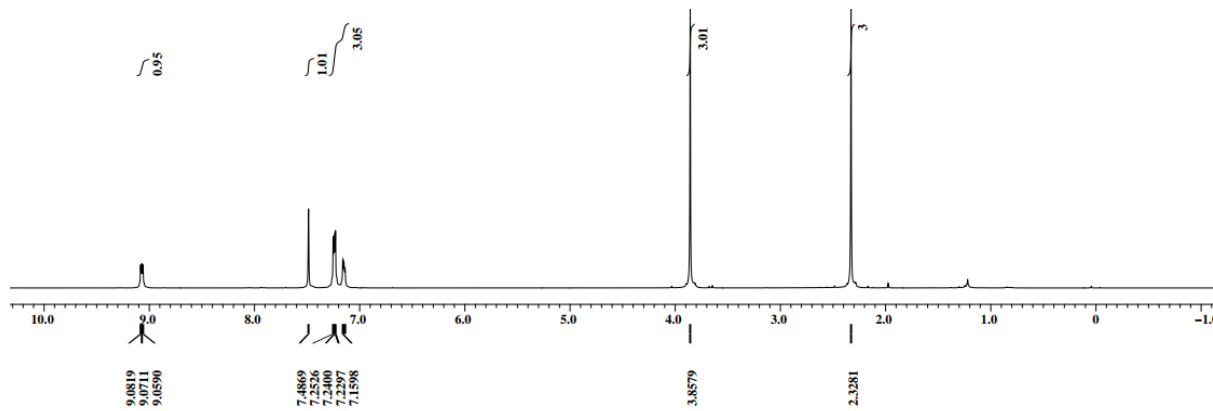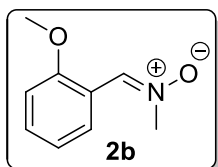

<sup>1</sup>H-NMR (CDCl<sub>3</sub>, 400MHz) of 2b

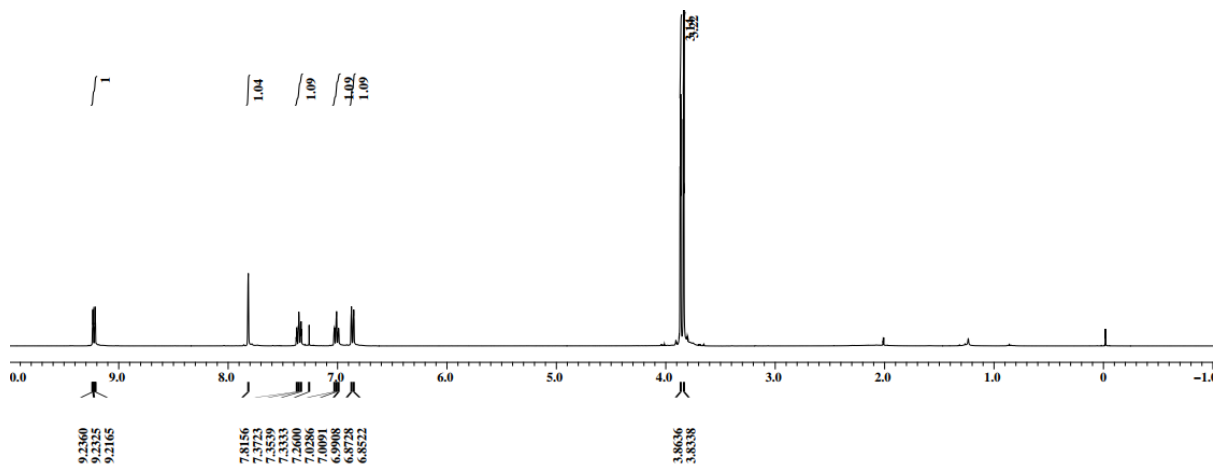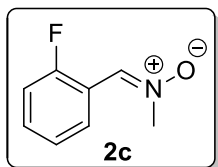

<sup>1</sup>H-NMR (CDCl<sub>3</sub>, 400MHz) of 2c

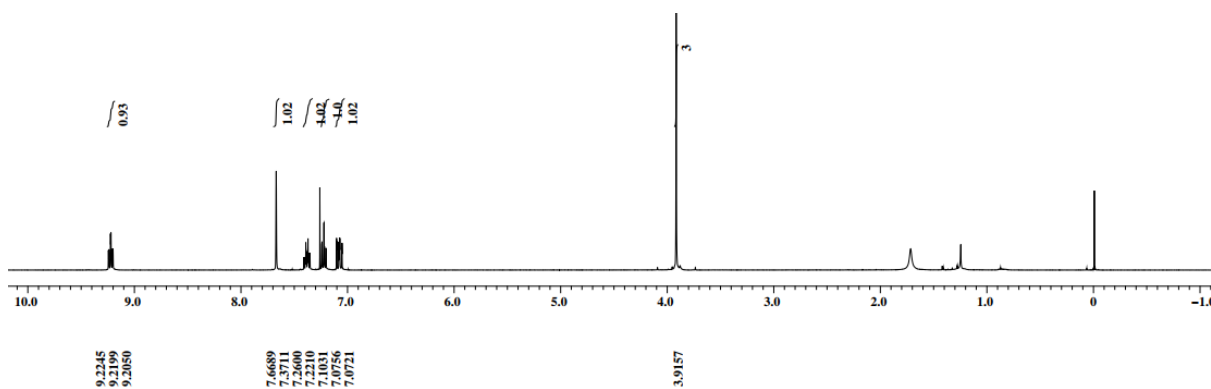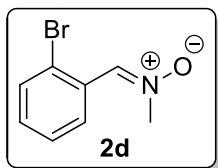

<sup>1</sup>H-NMR (CDCl<sub>3</sub>, 400MHz) of 2d

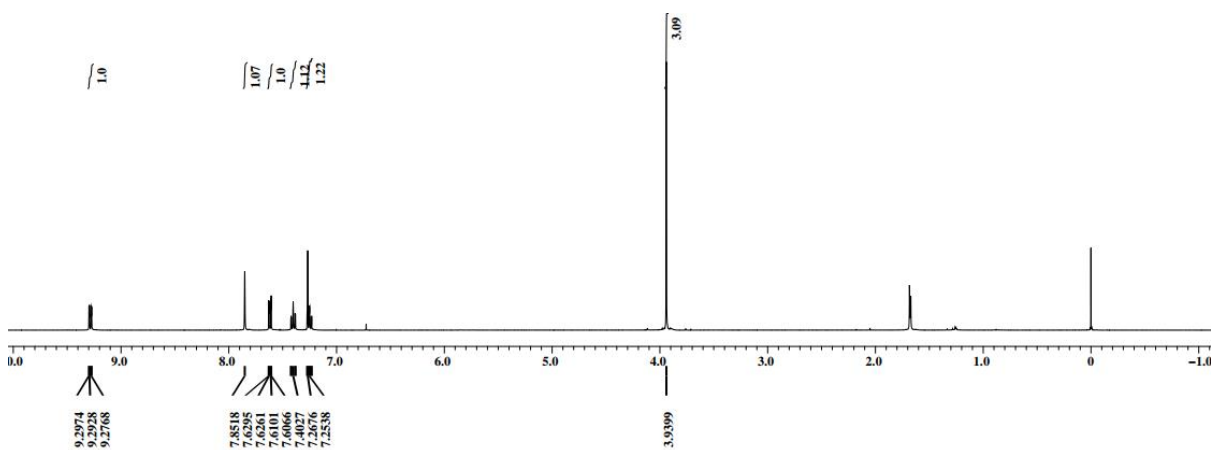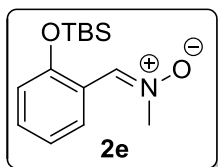

<sup>1</sup>H-NMR (CDCl<sub>3</sub>, 400MHz) of 2e

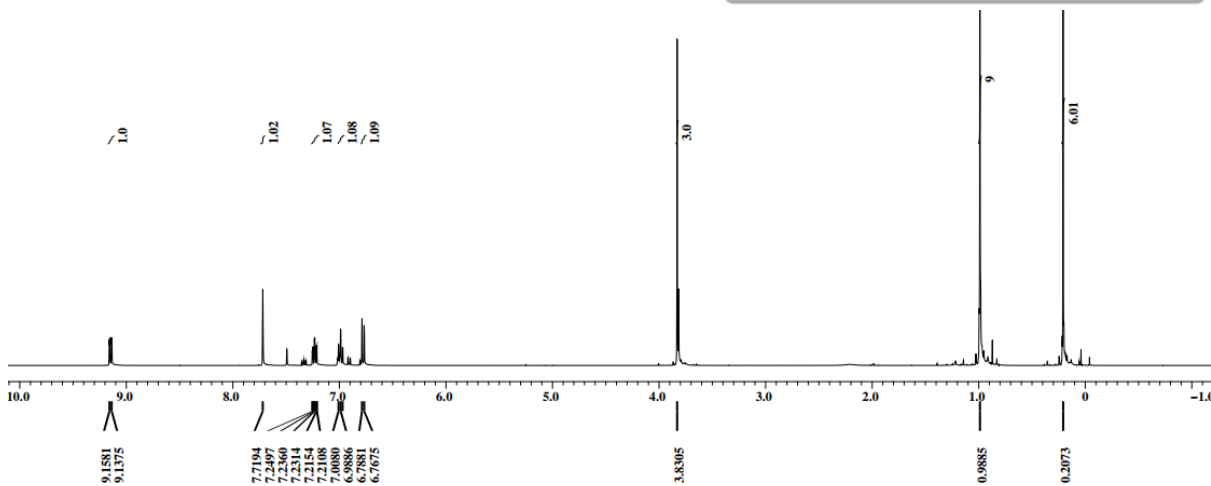

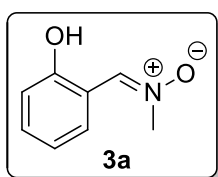

<sup>1</sup>H-NMR (CDCl<sub>3</sub>, 400MHz) of 3a

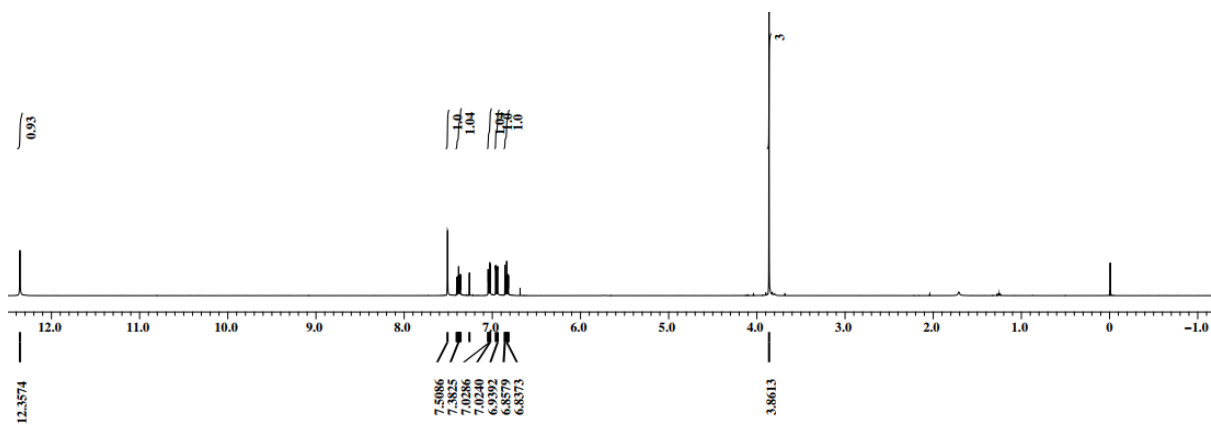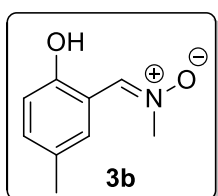

<sup>1</sup>H-NMR (CDCl<sub>3</sub>, 400MHz) of 3b

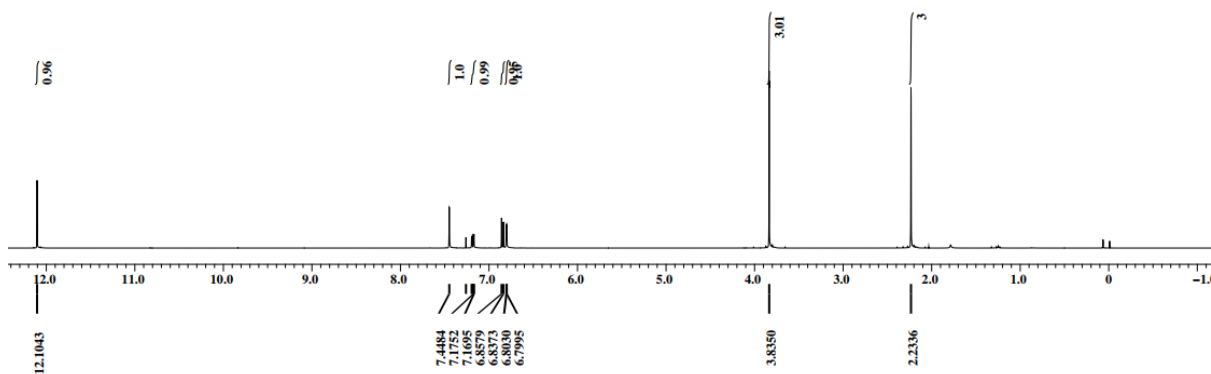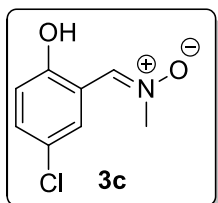

<sup>1</sup>H-NMR (CDCl<sub>3</sub>, 400MHz) of 3c

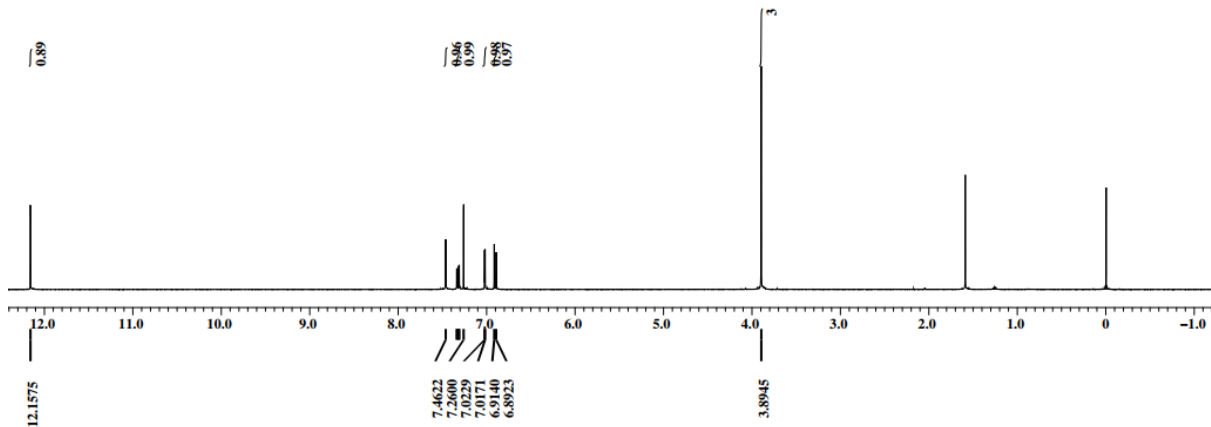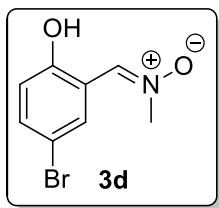

<sup>1</sup>H-NMR (CDCl<sub>3</sub>, 400MHz) of 3d

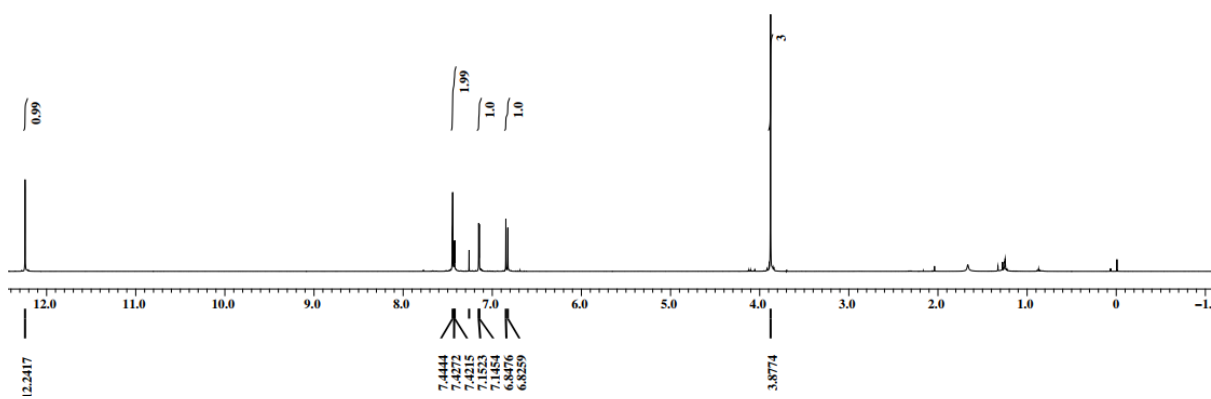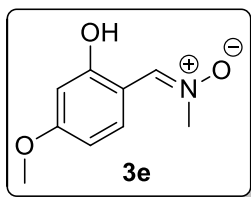

<sup>1</sup>H-NMR (CDCl<sub>3</sub>, 400MHz) of 3e

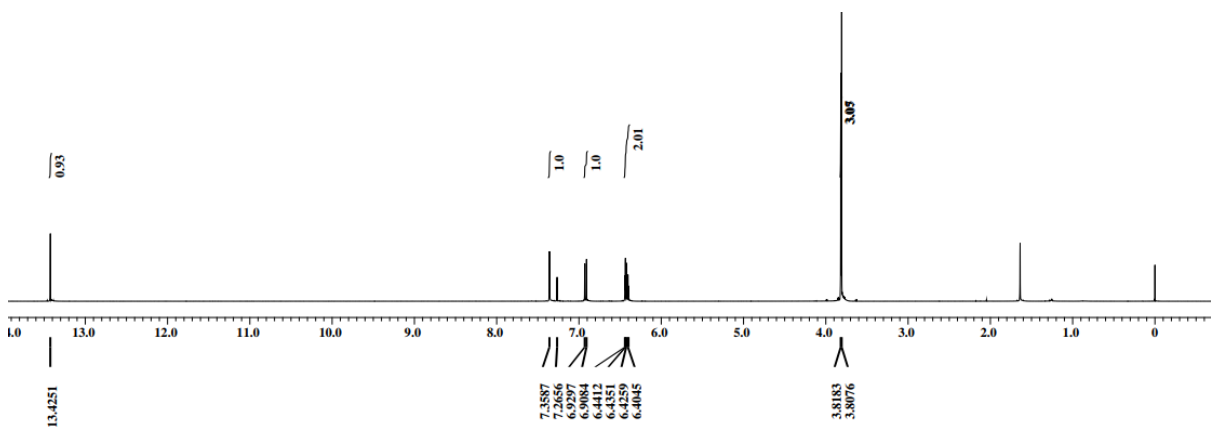



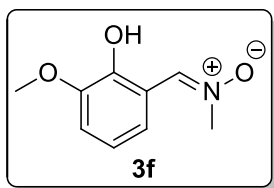

**<sup>1</sup>H-NMR (CDCl<sub>3</sub>, 400MHz) of 3f**

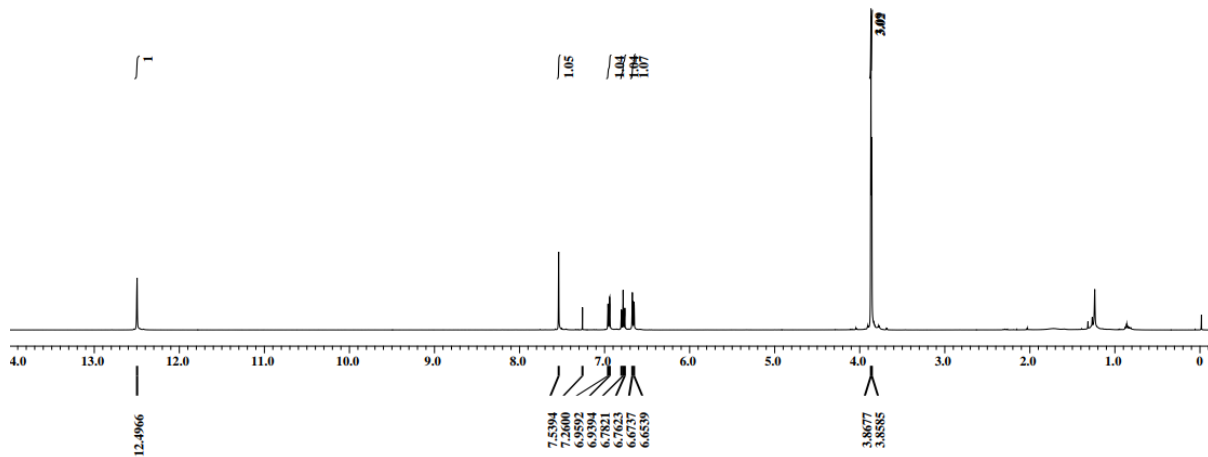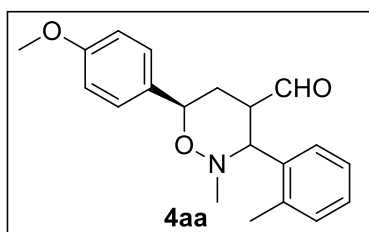

**<sup>1</sup>H-NMR (CDCl<sub>3</sub>, 400MHz) of 4aa**

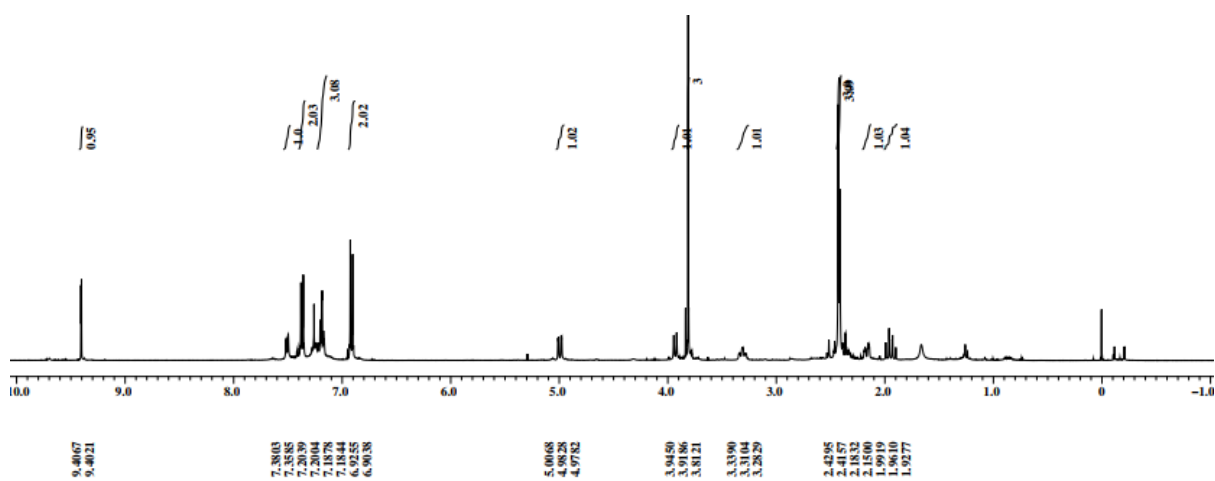

**<sup>13</sup>C-NMR (CDCl<sub>3</sub>, 100MHz) of 4aa**

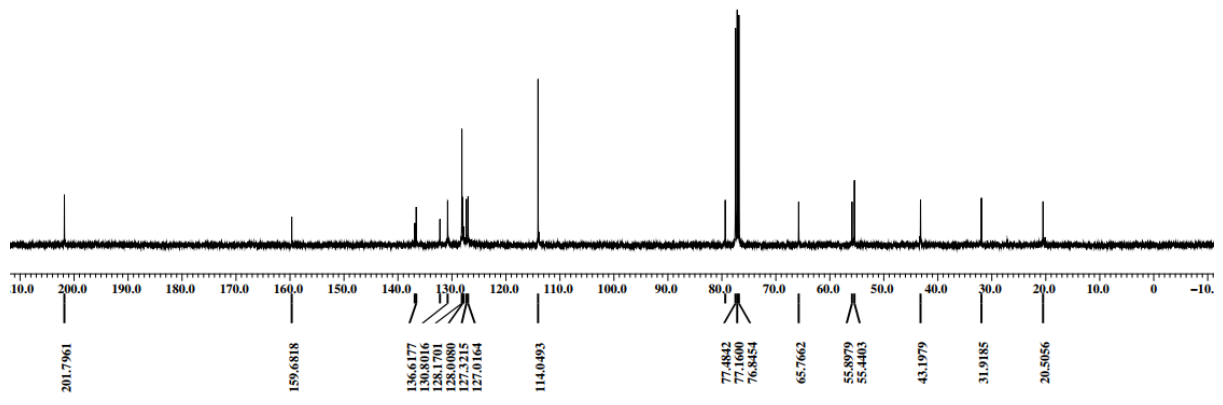

**<sup>1</sup>H-<sup>1</sup>H COSY NMR (CDCl<sub>3</sub>, 400MHz) of 4aa**

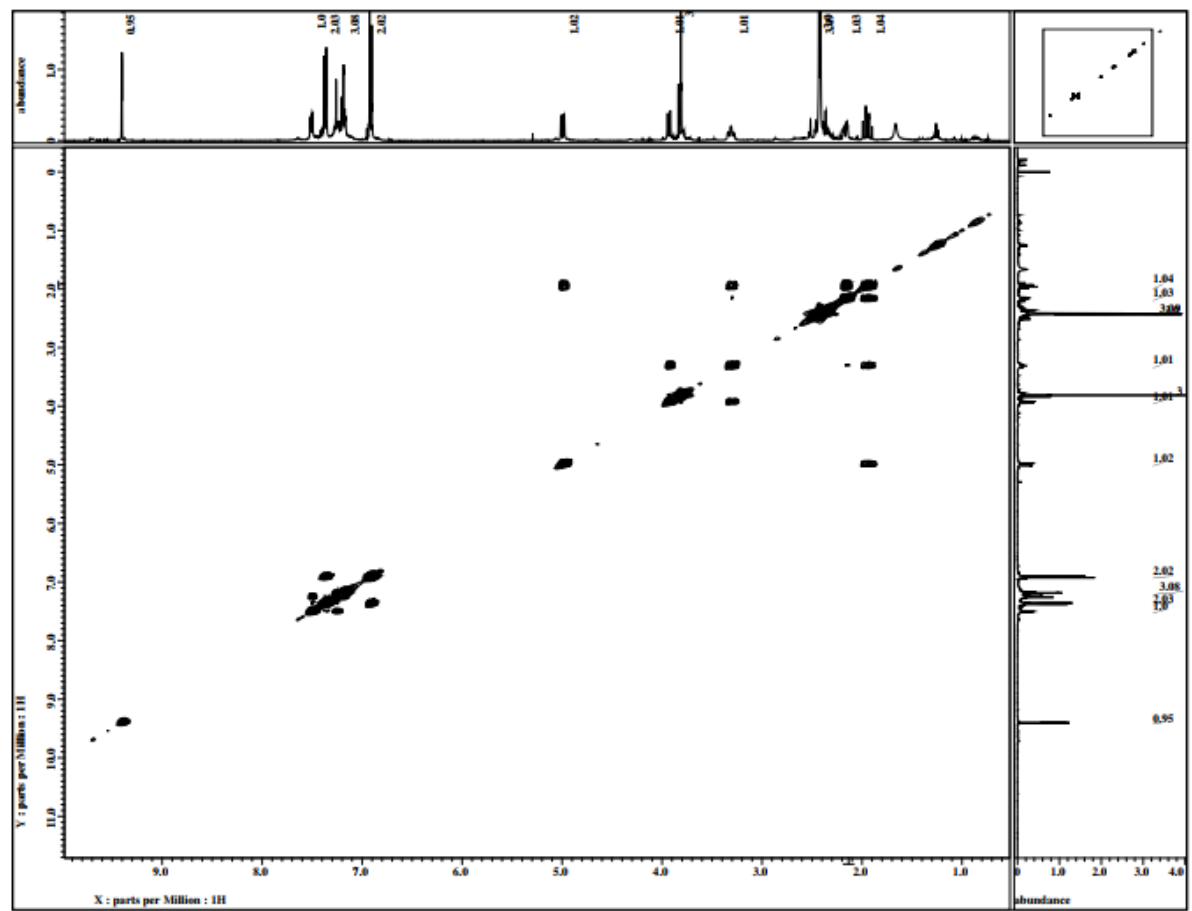

$^1\text{H}$ - $^1\text{H}$  NOESY NMR ( $\text{CDCl}_3$ , 400MHz) of 4aa

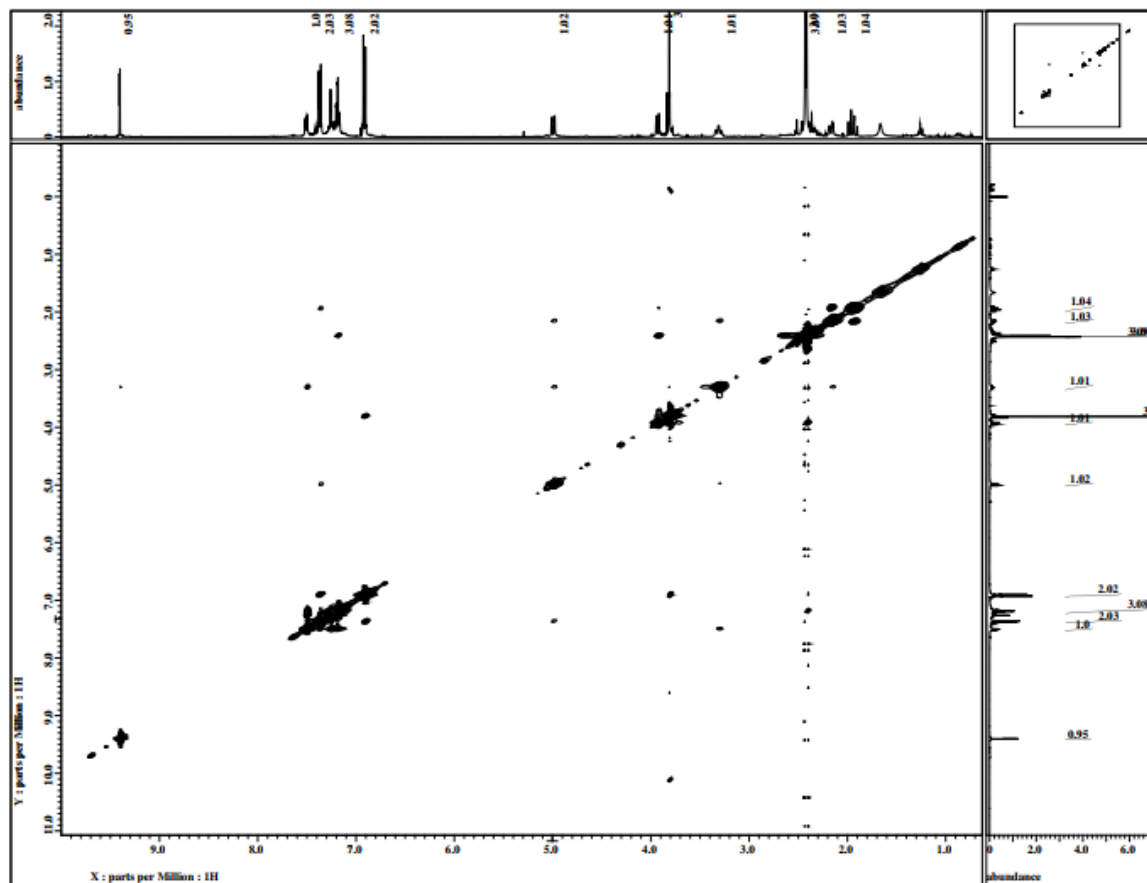

$^1\text{H}$ - $^1\text{H}$  NOESY NMR ( $\text{CDCl}_3$ , 400MHz) of 4aa ZOOM

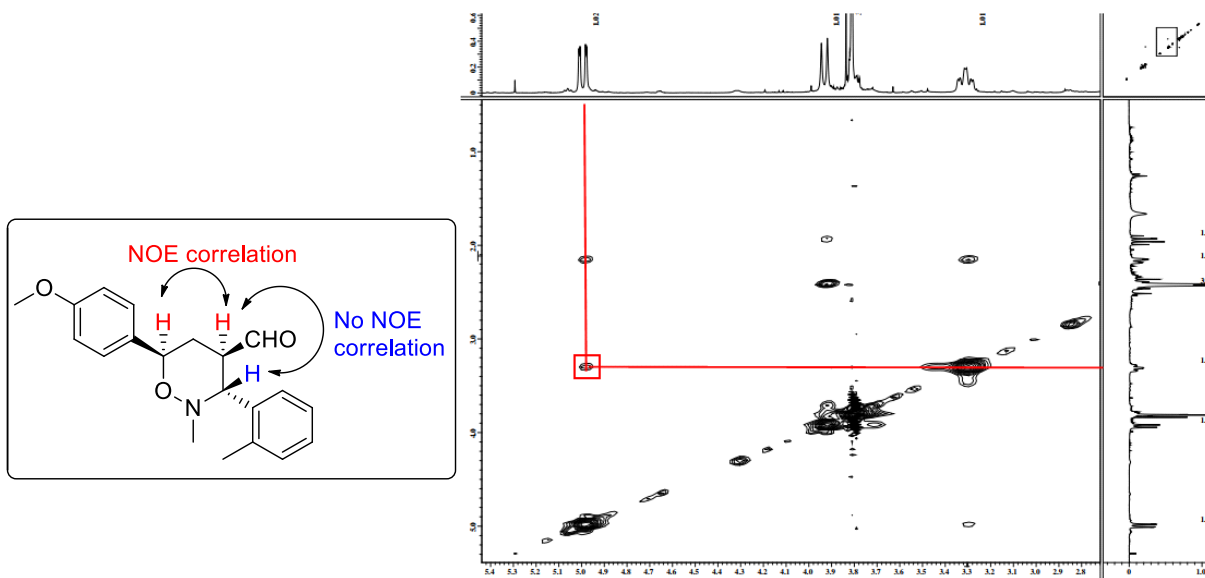

Elemental Composition Report

Single Mass Analysis

Tolerance = 5.0 PPM / DBE: min = -1.5, max = 50.0

Element prediction: Off

Number of isotope peaks used for i-FIT = 2

Monoisotopic Mass, Even Electron Ions

61 formula(e) evaluated with 1 results within limits (up to 1 closest results for each mass)

Elements Used:

C: 1-50 H: 1-100 N: 1-1 O: 1-10 79Br: 0-1

Sample Name : 25\_02\_233  
 Test Name :  
 110822\_25\_02\_233 21 (0.231)

IITRPR

XEVO G2-XS QTOF

1: TOF MS ES+  
 5.33e+006

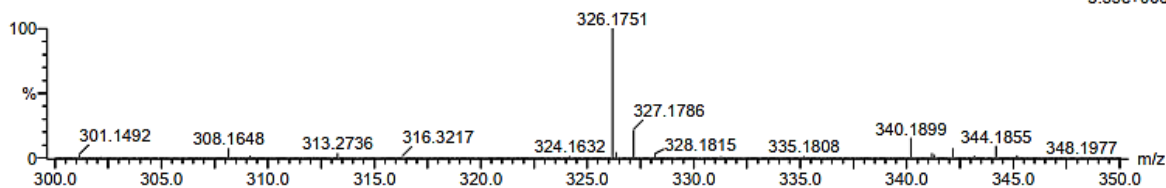

Minimum: -1.5  
 Maximum: 2.0 5.0 50.0

| Mass     | Calc. Mass | mDa  | PPM  | DBE | i-FIT | Norm | Conf (%) | Formula      |
|----------|------------|------|------|-----|-------|------|----------|--------------|
| 326.1751 | 326.1756   | -0.5 | -1.5 | 9.5 | 623.9 | n/a  | n/a      | C20 H24 N O3 |

HPLC spectra of racemic 4aa

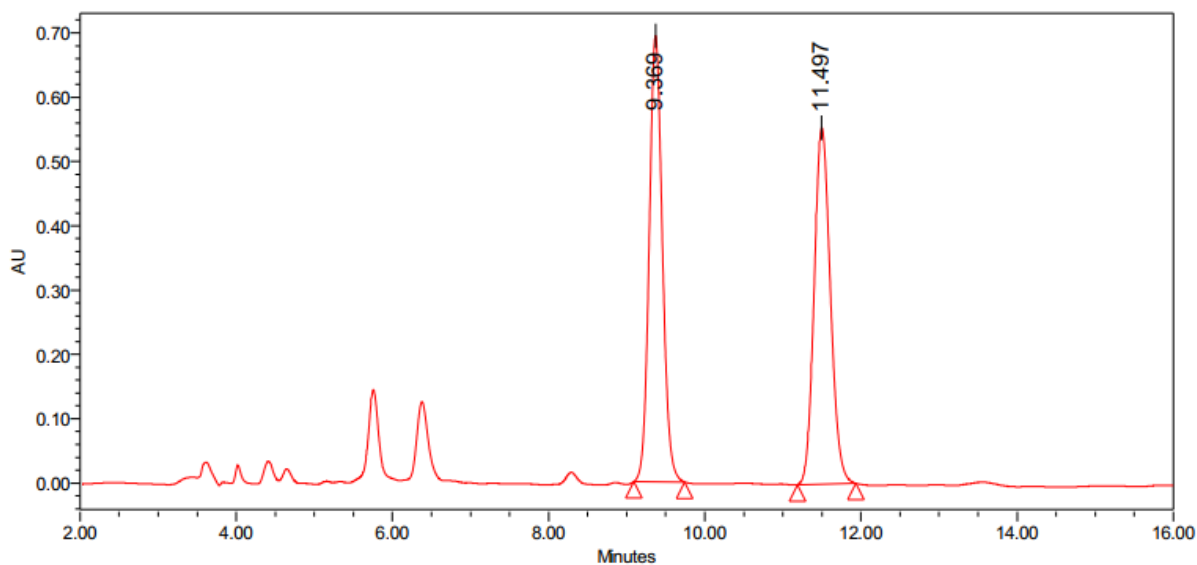

| Name | RT     | Area    | % Area |
|------|--------|---------|--------|
| 1    | 9.369  | 8137460 | 50.34  |
| 2    | 11.497 | 8026886 | 49.66  |

## HPLC spectra of chiral 4aa

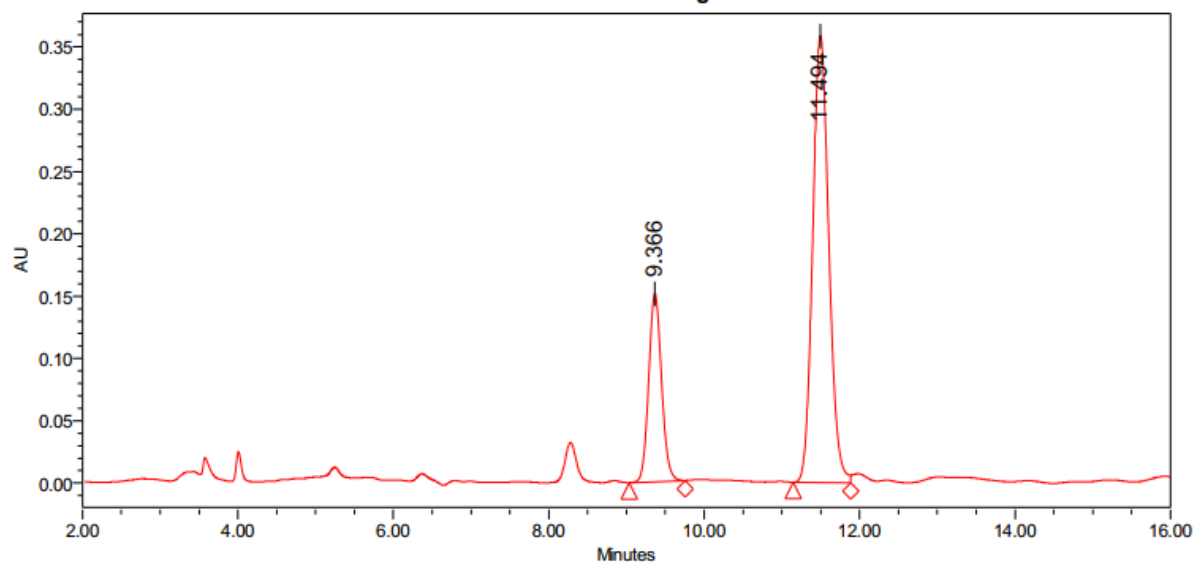

| Peak Results |        |         |        |
|--------------|--------|---------|--------|
| Name         | RT     | Area    | % Area |
| 1            | 9.366  | 1744152 | 25.21  |
| 2            | 11.494 | 5174913 | 74.79  |

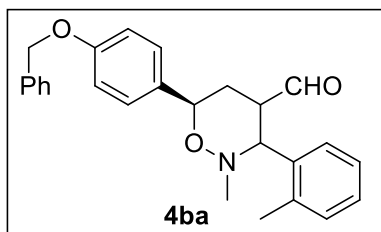

## <sup>1</sup>H-NMR (CDCl<sub>3</sub>, 400MHz) of 4ba

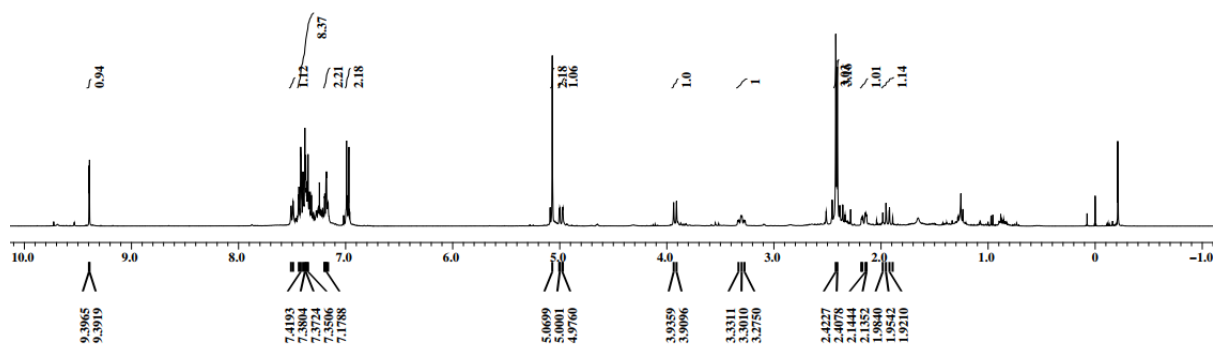

## <sup>13</sup>C-NMR (CDCl<sub>3</sub>, 100MHz) of 4ba

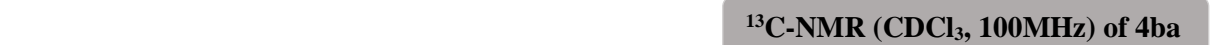

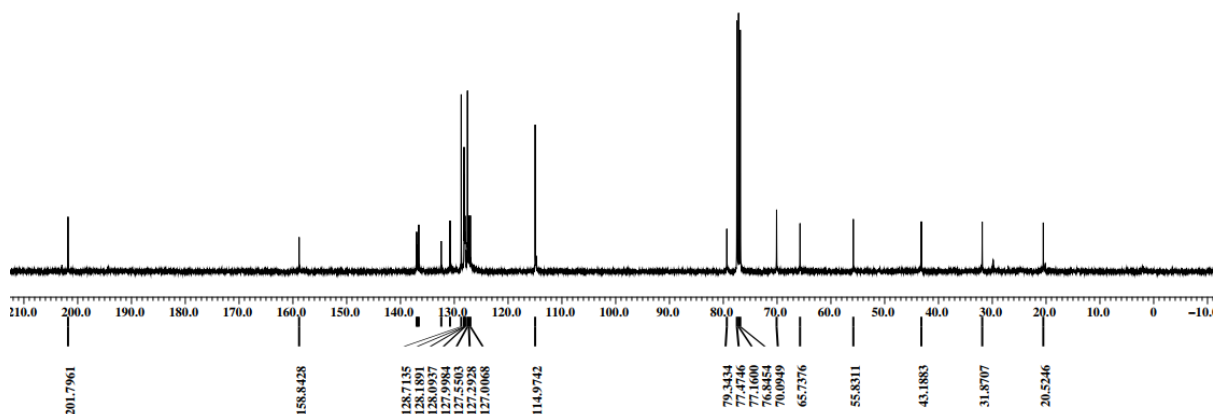

**HRMS of 4ba**

**Elemental Composition Report**

Page 1

**Single Mass Analysis**

Tolerance = 5.0 PPM / DBE: min = -1.5, max = 50.0

Element prediction: Off

Number of isotope peaks used for i-FIT = 2

Monoisotopic Mass, Even Electron Ions

79 formula(e) evaluated with 1 results within limits (up to 1 closest results for each mass)

Elements Used:

C: 1-50 H: 1-100 N: 1-1 O: 1-10 79Br: 0-1

Sample Name : 25\_02\_285

IITRPR

XEVO G2-XS QTOF

Test Name :

1: TOF MS ES+  
8.98e+006

110822\_25\_02\_285 8 (0.097)

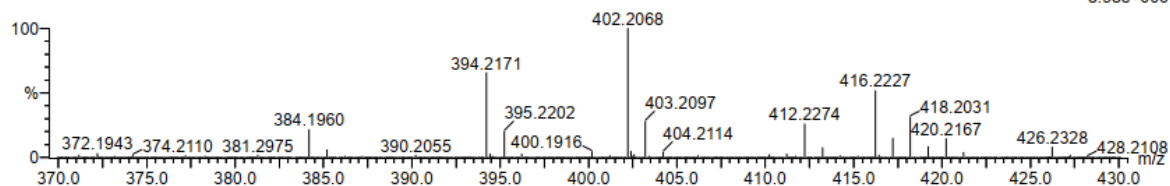

Minimum: -1.5  
Maximum: 2.0 5.0 50.0

| Mass     | Calc. Mass | mDa  | PPM  | DBE  | i-FIT | Norm | Conf(%) | Formula      |
|----------|------------|------|------|------|-------|------|---------|--------------|
| 402.2068 | 402.2069   | -0.1 | -0.2 | 13.5 | 485.8 | n/a  | n/a     | C26 H28 N O3 |

### HPLC spectra of racemic 4ba

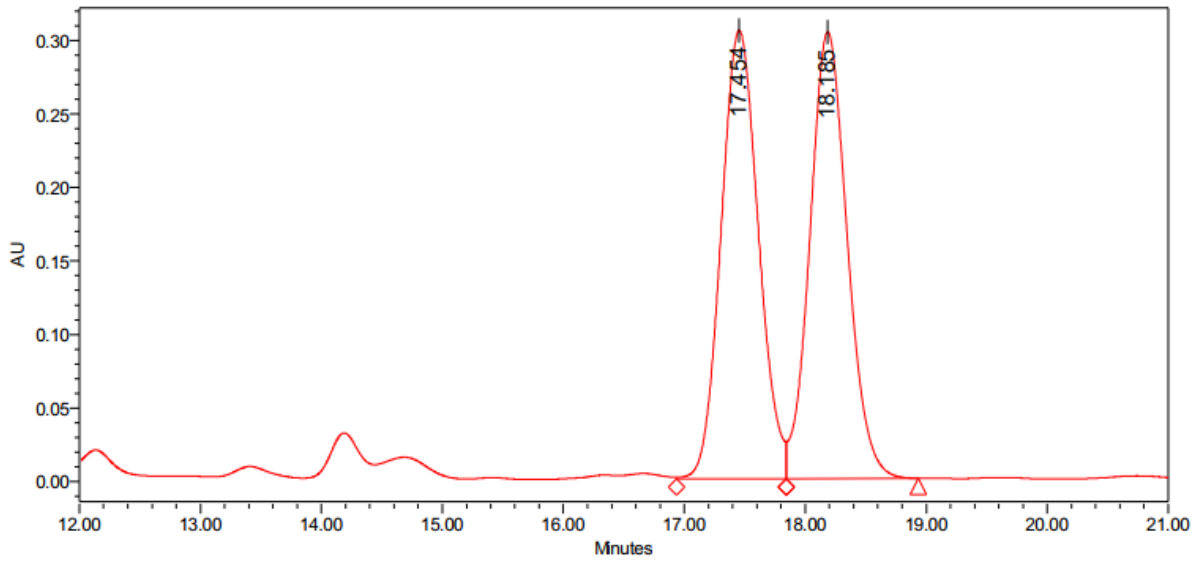

Peak Results

| Name | RT     | Area    | % Area |
|------|--------|---------|--------|
| 1    | 17.454 | 6537031 | 50.05  |
| 2    | 18.185 | 6523167 | 49.95  |

### HPLC spectra of chiral 4ba

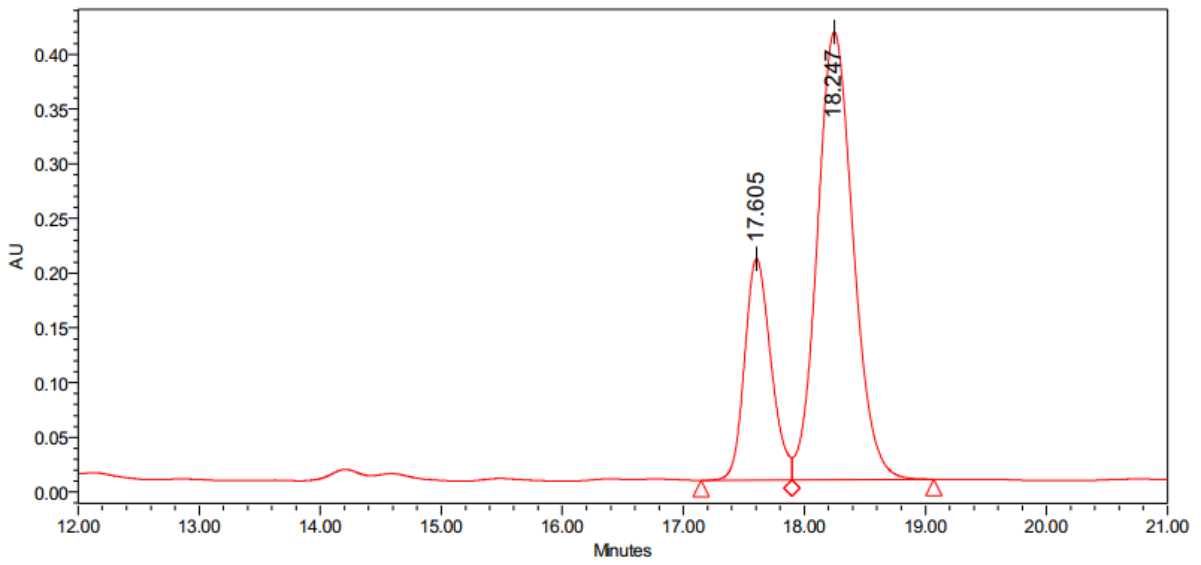

Peak Results

| Name | RT     | Area    | % Area |
|------|--------|---------|--------|
| 1    | 17.605 | 3052717 | 26.59  |
| 2    | 18.247 | 8429311 | 73.41  |

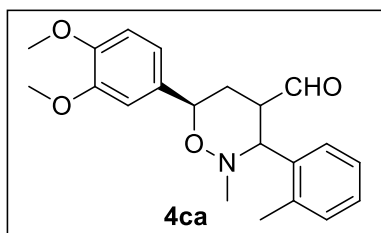

**$^1\text{H-NMR}$  ( $\text{CDCl}_3$ , 400MHz) of 4ca**

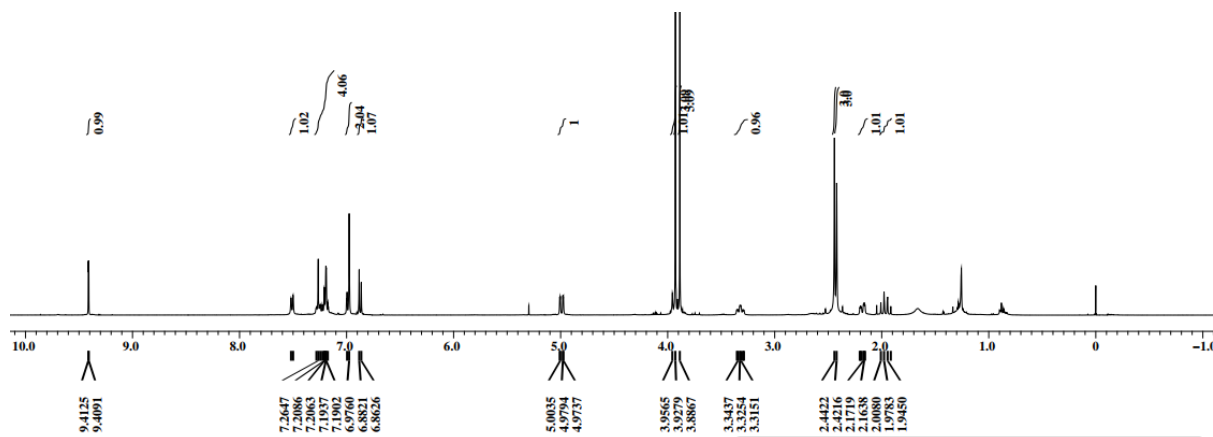

**$^{13}\text{C-NMR}$  ( $\text{CDCl}_3$ , 100MHz) of 4ca**

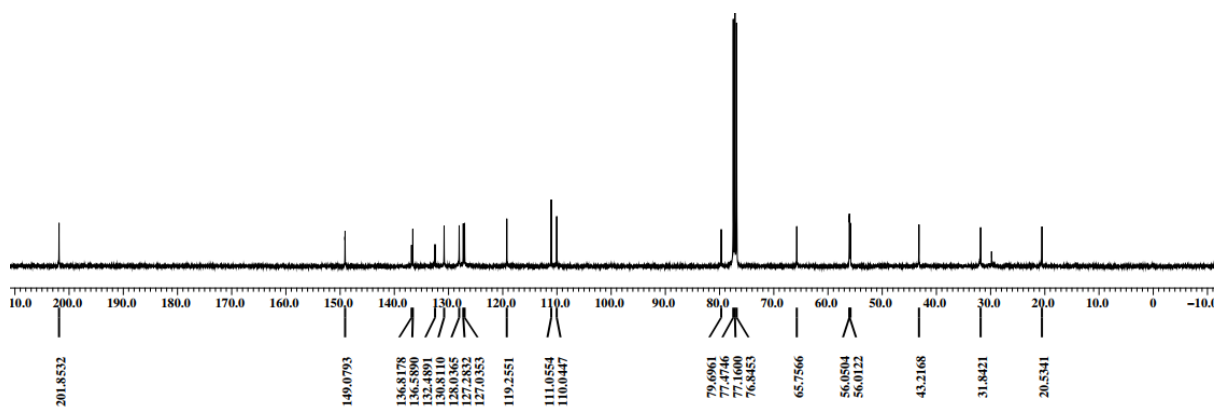



Elemental Composition Report

Single Mass Analysis

Tolerance = 5.0 PPM / DBE: min = -1.5, max = 50.0

Element prediction: Off

Number of isotope peaks used for i-FIT = 2

Monoisotopic Mass, Even Electron Ions

96 formula(e) evaluated with 1 results within limits (up to 1 closest results for each mass)

Elements Used:

C: 1-22 H: 1-100 N: 0-5 O: 1-5

Sample Name : 25\_02\_288

Test Name :

080822\_25\_02\_288 11 (0.134)

IITRPR

XEVO G2-XS QTOF

1: TOF MS ES+  
4.21e+007

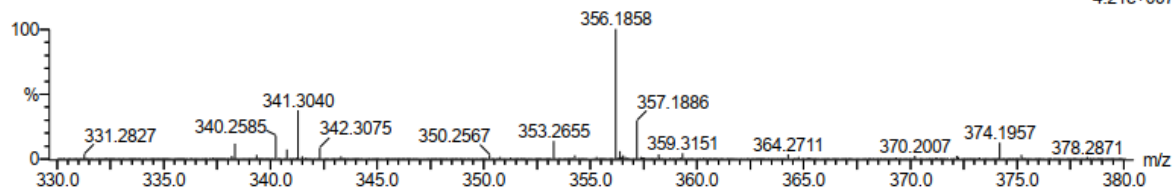

Minimum: -1.5  
Maximum: 2.0 5.0 50.0

| Mass     | Calc. Mass | mDa  | PPM  | DBE | i-FIT | Norm | Conf (%) | Formula      |
|----------|------------|------|------|-----|-------|------|----------|--------------|
| 356.1858 | 356.1862   | -0.4 | -1.1 | 9.5 | 675.7 | n/a  | n/a      | C21 H26 N O4 |

HPLC spectra of racemic 4ca

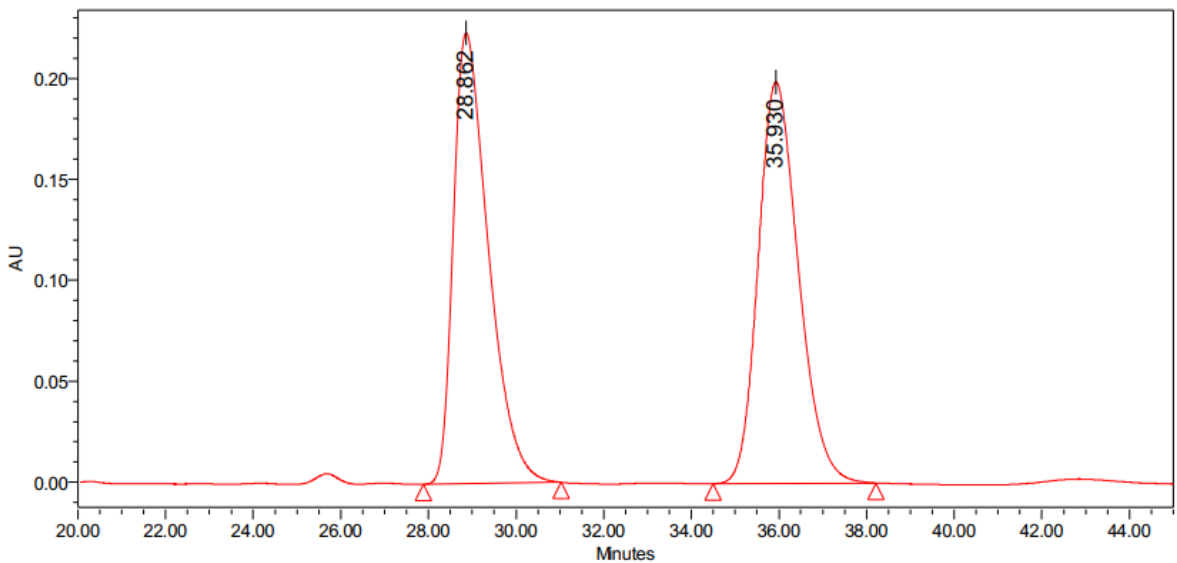

Peak Results

| Name | RT     | Area     | % Area |
|------|--------|----------|--------|
| 1    | 28.862 | 12434799 | 49.55  |
| 2    | 35.930 | 12660008 | 50.45  |

## HPLC spectra of chiral 4ca

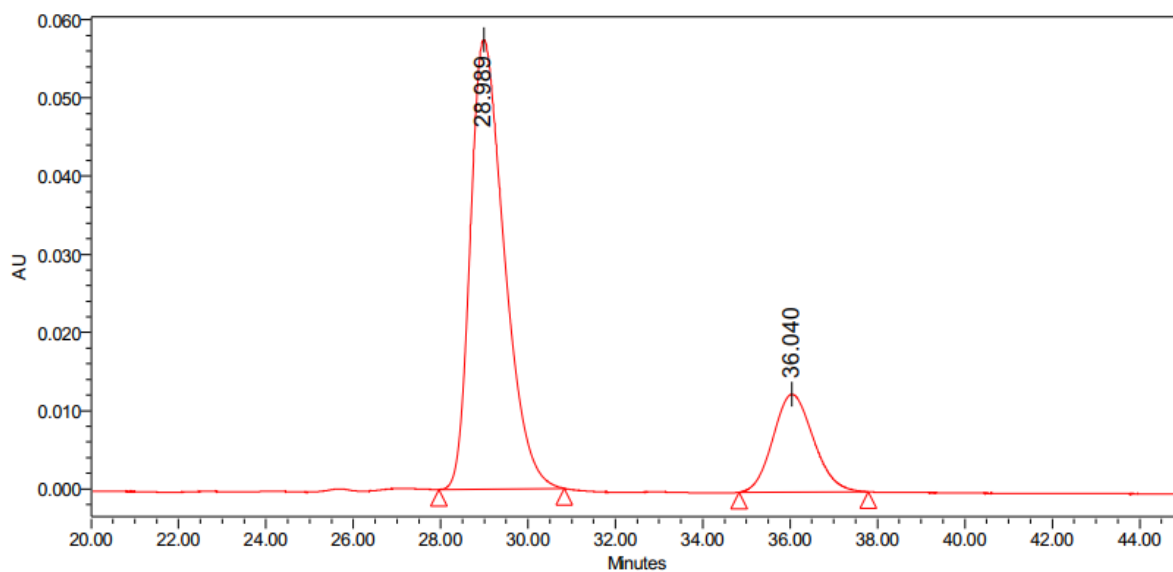

| Peak Results |        |         |        |
|--------------|--------|---------|--------|
| Name         | RT     | Area    | % Area |
| 1            | 28.989 | 3129184 | 79.65  |
| 2            | 36.040 | 799360  | 20.35  |

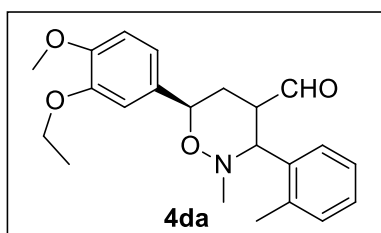

## <sup>1</sup>H-NMR (CDCl<sub>3</sub>, 400MHz) of 4da

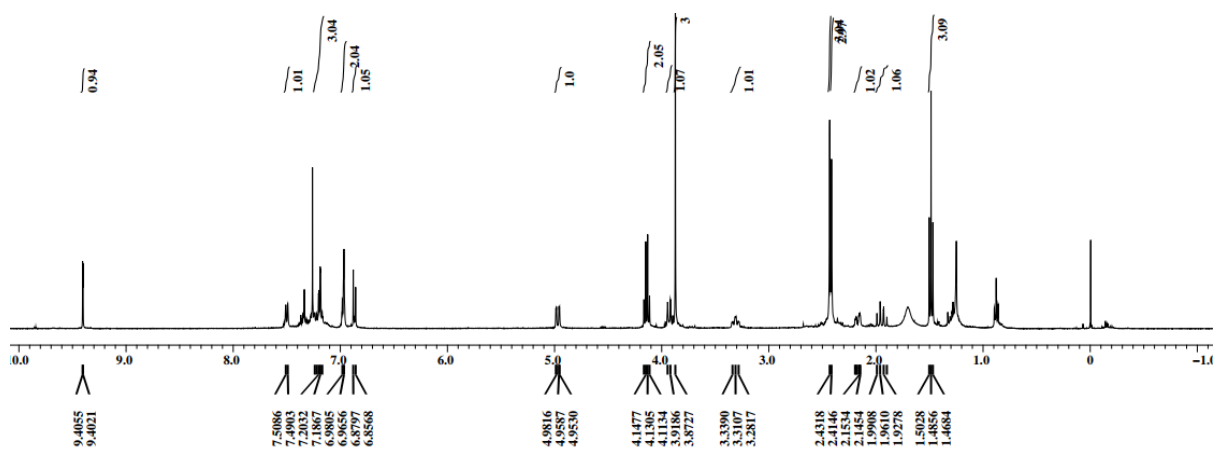

<sup>13</sup>C-NMR (CDCl<sub>3</sub>, 100MHz) of 4da

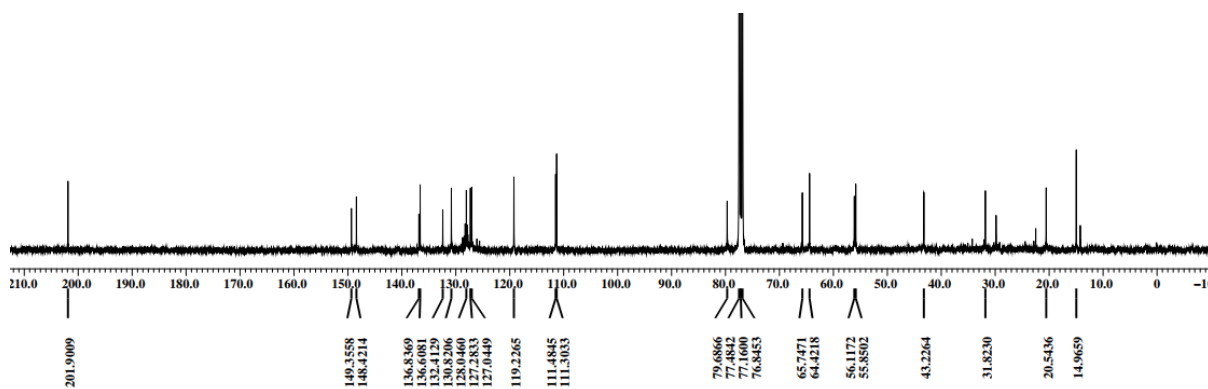

HRMS of 4da

Elemental Composition Report

Single Mass Analysis

Tolerance = 5.0 PPM / DBE: min = -1.5, max = 50.0

Element prediction: Off

Number of isotope peaks used for i-FIT = 2

Monoisotopic Mass, Odd and Even Electron Ions

34 formula(e) evaluated with 1 results within limits (up to 1 closest results for each mass)

Elements Used:

C: 22-22 H: 1-100 N: 0-5 O: 0-5

Sample Name : 25\_02\_291

Test Name :

080822\_25\_02\_291 22 (0.240)

IITRPR

XEVO G2-XS QTOF

1: TOF MS ES+  
1.75e+007

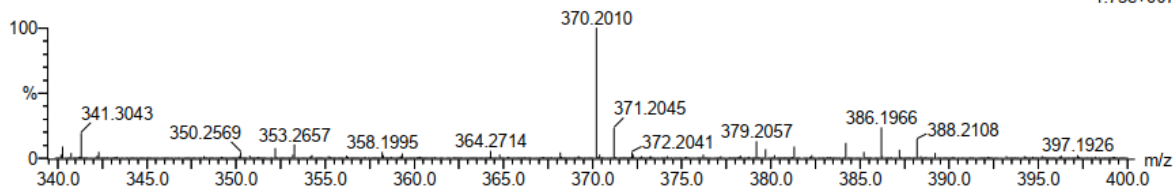

Minimum: -1.5  
Maximum: 2.0 5.0 50.0

| Mass     | Calc. Mass | mDa  | PPM  | DBE | i-FIT | Norm | Conf(%) | Formula      |
|----------|------------|------|------|-----|-------|------|---------|--------------|
| 370.2010 | 370.2018   | -0.8 | -2.2 | 9.5 | 728.6 | n/a  | n/a     | C22 H28 N O4 |

### HPLC spectra of racemic 4da

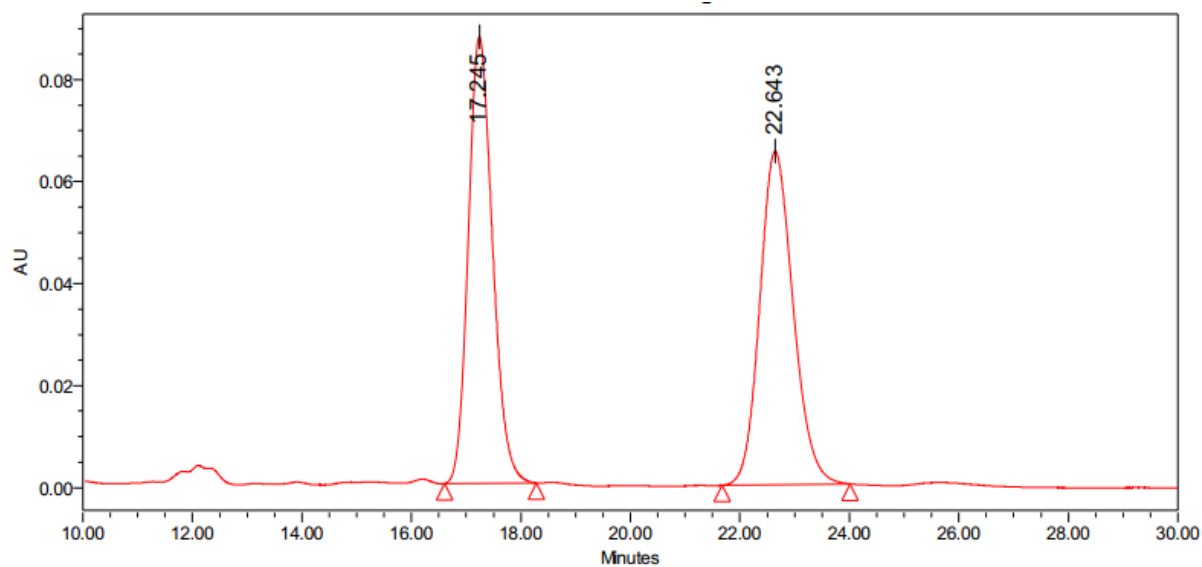

| Peak Results |        |         |        |
|--------------|--------|---------|--------|
| Name         | RT     | Area    | % Area |
| 1            | 17.245 | 2688440 | 49.39  |
| 2            | 22.643 | 2754392 | 50.61  |

### HPLC spectra of chiral 4da

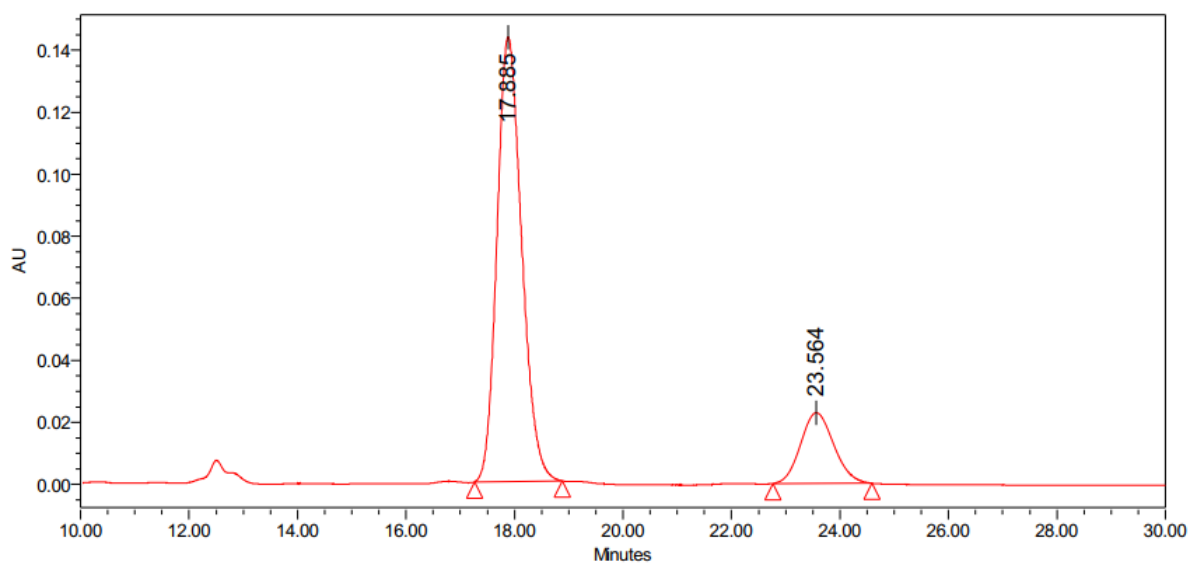

| Peak Results |        |         |        |
|--------------|--------|---------|--------|
| Name         | RT     | Area    | % Area |
| 1            | 17.885 | 4516387 | 82.34  |
| 2            | 23.564 | 968732  | 17.66  |

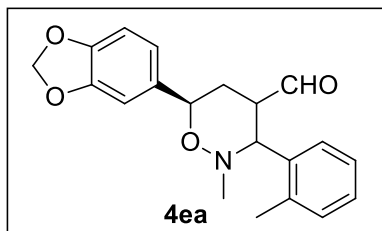

**<sup>1</sup>H-NMR (CDCl<sub>3</sub>, 400MHz) of 4ea**

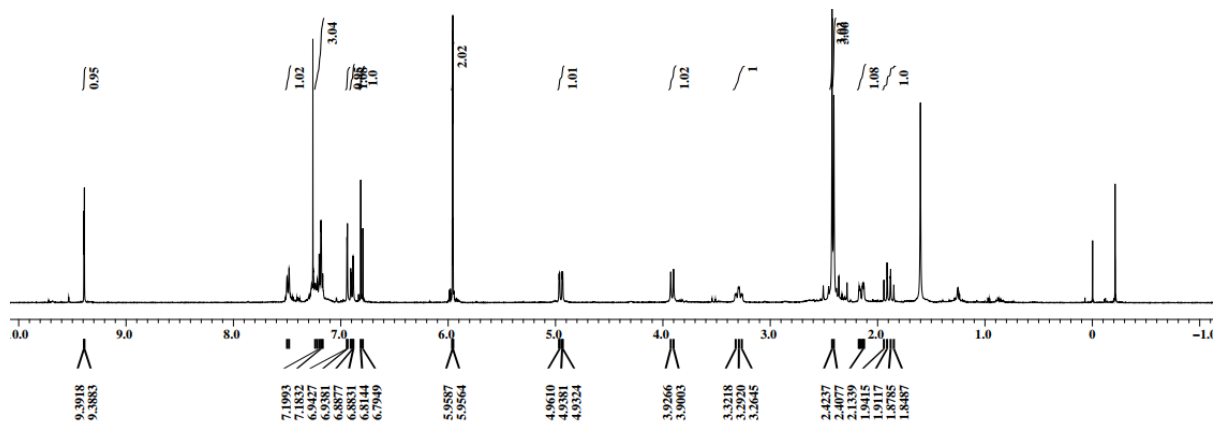

**<sup>13</sup>C-NMR (CDCl<sub>3</sub>, 100MHz) of 4ea**

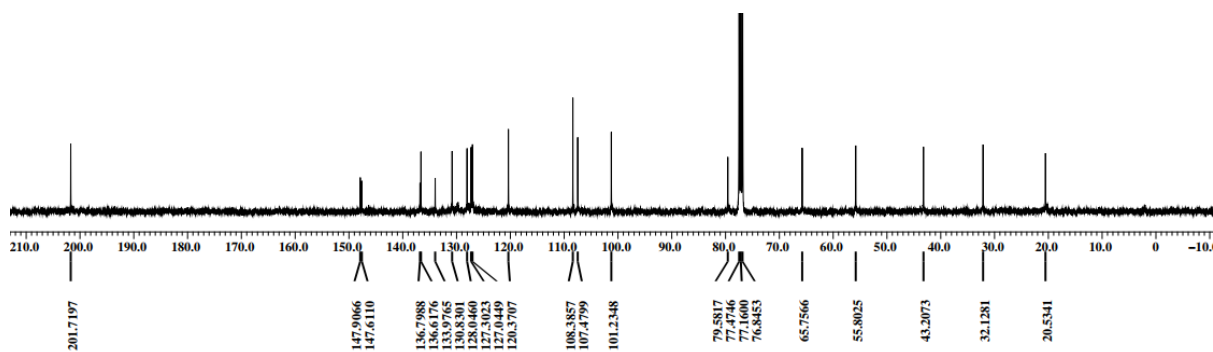

Elemental Composition Report

Single Mass Analysis

Tolerance = 5.0 PPM / DBE: min = -1.5, max = 50.0  
 Element prediction: Off  
 Number of isotope peaks used for i-FIT = 2

Monoisotopic Mass, Even Electron Ions

64 formula(e) evaluated with 1 results within limits (up to 1 closest results for each mass)

Elements Used:

C: 1-50 H: 1-100 N: 1-1 O: 1-10 79Br: 0-1

Sample Name : 25\_02\_312  
 Test Name :  
 110822\_25\_02\_312 9 (0.117)

IITRPR

XEVO G2-XS QTOF

1: TOF MS ES+  
 1.07e+007

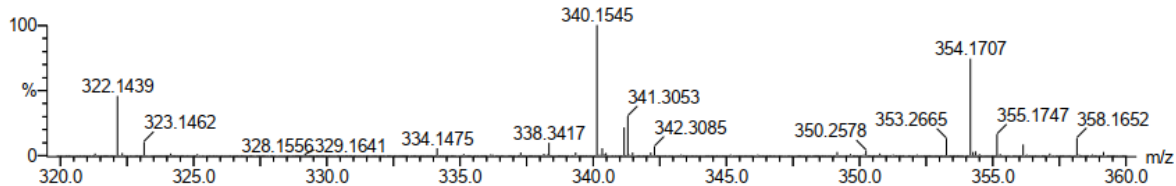

Minimum: -1.5  
 Maximum: 2.0 5.0 50.0

| Mass     | Calc. Mass | mDa  | PPM  | DBE  | i-FIT | Norm | Conf (%) | Formula      |
|----------|------------|------|------|------|-------|------|----------|--------------|
| 340.1545 | 340.1549   | -0.4 | -1.2 | 10.5 | 657.4 | n/a  | n/a      | C20 H22 N O4 |

HPLC spectra of racemic 4ea

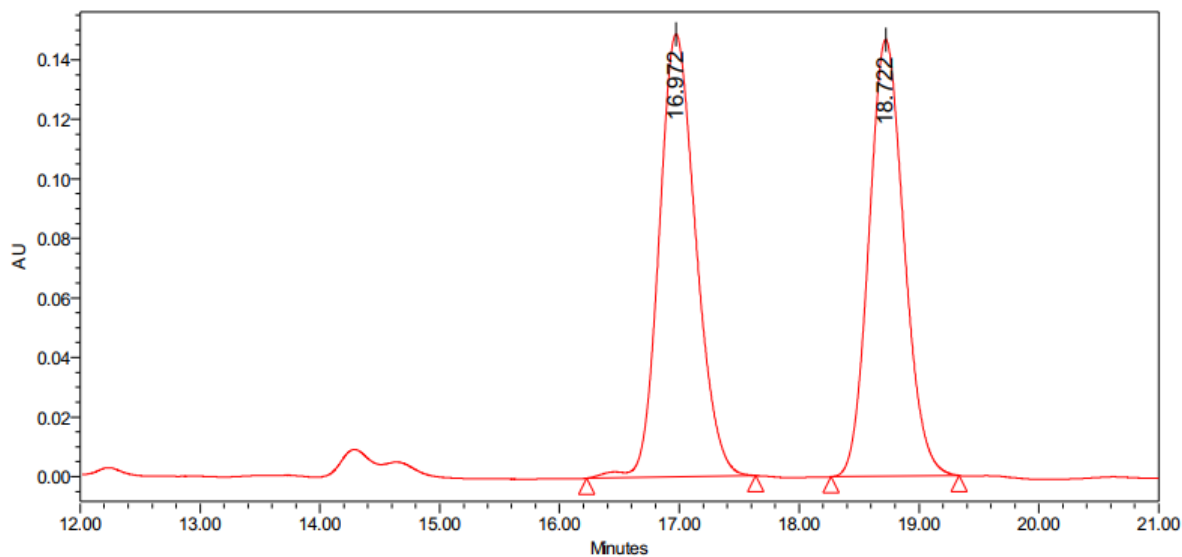

| Name | RT     | Area    | % Area |
|------|--------|---------|--------|
| 1    | 16.972 | 3172593 | 51.51  |
| 2    | 18.722 | 2987108 | 48.49  |

### HPLC spectra of chiral 4ea

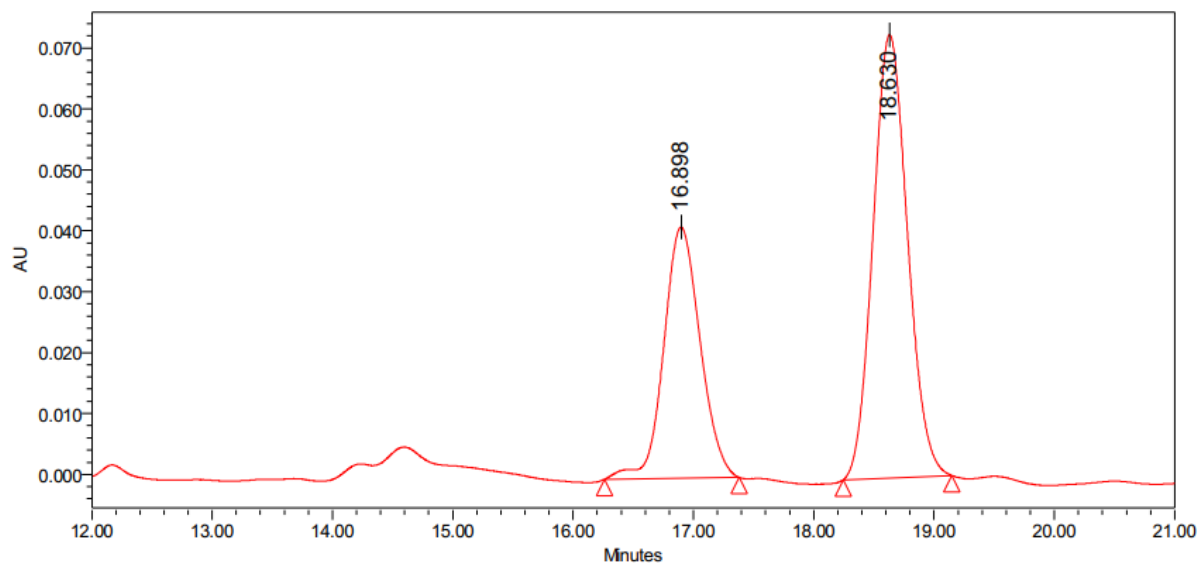

Peak Results

| Name | RT     | Area    | % Area |
|------|--------|---------|--------|
| 1    | 16.898 | 868034  | 37.44  |
| 2    | 18.630 | 1450514 | 62.56  |

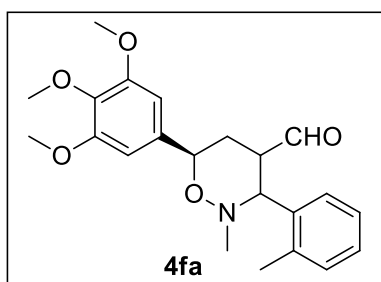

### <sup>1</sup>H-NMR (CDCl<sub>3</sub>, 400MHz) of 4fa

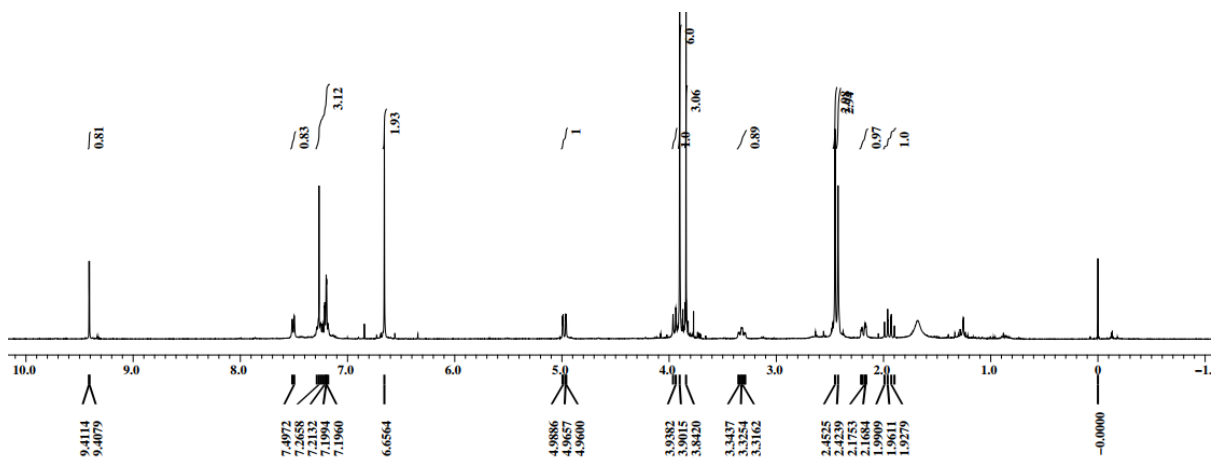

**<sup>13</sup>C-NMR (CDCl<sub>3</sub>, 100MHz) of 4fa**

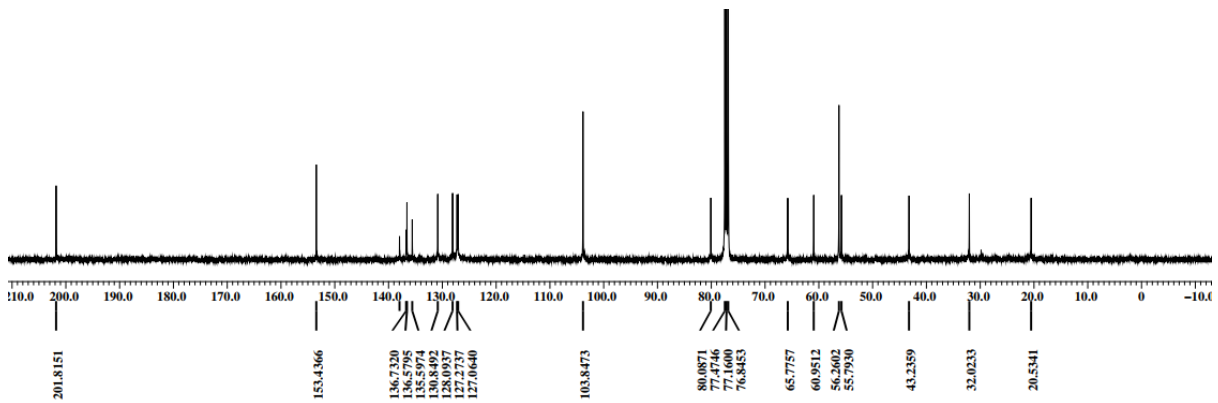

**HRMS of 4fa**

**Elemental Composition Report**

**Single Mass Analysis**

Tolerance = 5.0 PPM / DBE: min = -1.5, max = 50.0

Element prediction: Off

Number of isotope peaks used for i-FIT = 2

Monoisotopic Mass, Even Electron Ions

76 formula(e) evaluated with 1 results within limits (up to 1 closest results for each mass)

Elements Used:

C: 1-50 H: 1-100 N: 1-1 O: 1-10 79Br: 0-1

Sample Name : 25\_02\_310

IITRPR

XEVO G2-XS QTOF

Test Name :

110822\_25\_02\_310 8 (0.097)

1: TOF MS ES+  
6.28e+006

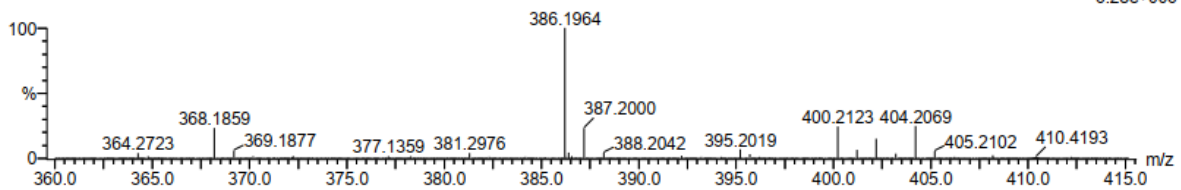

Minimum: -1.5  
Maximum: 2.0 5.0 50.0

| Mass     | Calc. Mass | mDa  | PPM  | DBE | i-FIT | Norm | Conf (%) | Formula      |
|----------|------------|------|------|-----|-------|------|----------|--------------|
| 386.1964 | 386.1967   | -0.3 | -0.8 | 9.5 | 530.1 | n/a  | n/a      | C22 H28 N O5 |



### HPLC spectra of racemic 4fa

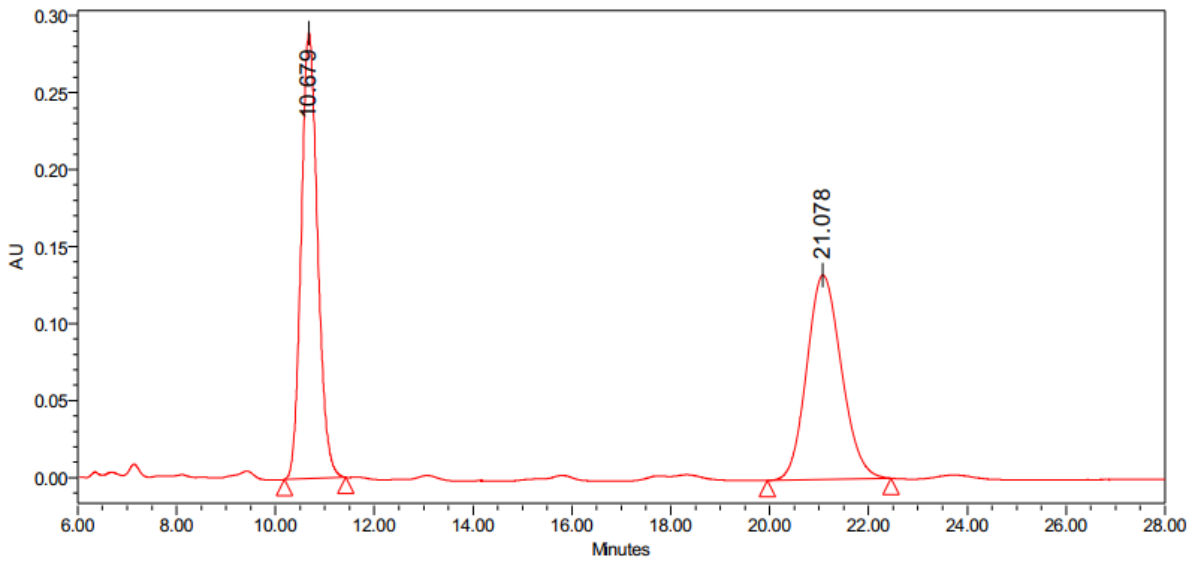

Peak Results

| Name | RT     | Area    | % Area |
|------|--------|---------|--------|
| 1    | 10.679 | 6637235 | 50.63  |
| 2    | 21.078 | 6471619 | 49.37  |

### HPLC spectra of chiral 4fa

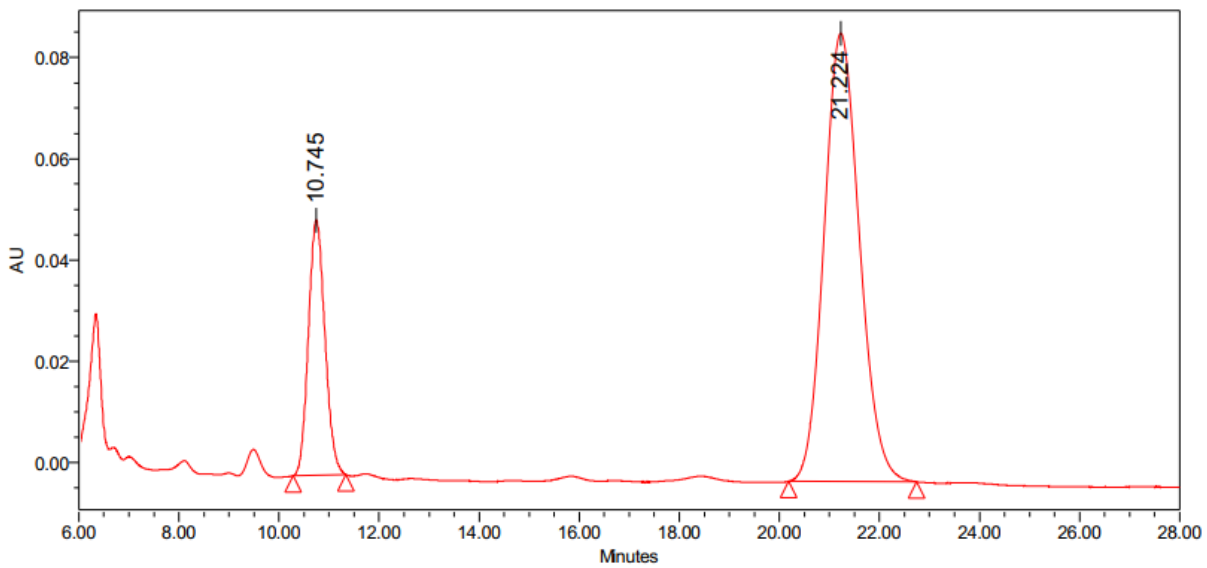

Peak Results

| Name | RT     | Area    | % Area |
|------|--------|---------|--------|
| 1    | 10.745 | 1151929 | 20.89  |
| 2    | 21.224 | 4362202 | 79.11  |

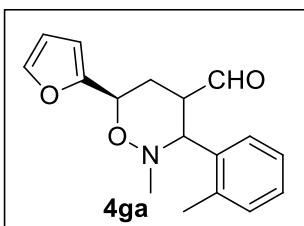

### <sup>1</sup>H-NMR (CDCl<sub>3</sub>, 400MHz) of 4ga

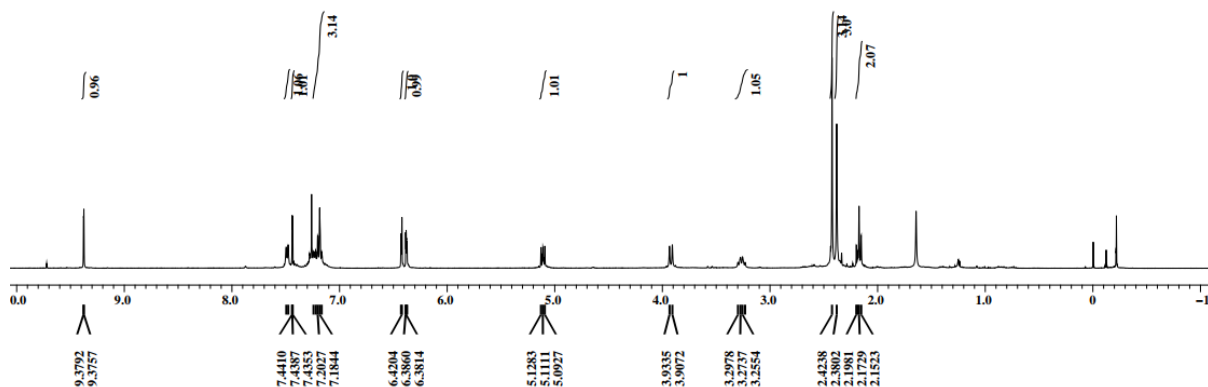

### <sup>13</sup>C-NMR (CDCl<sub>3</sub>, 100MHz) of 4ga

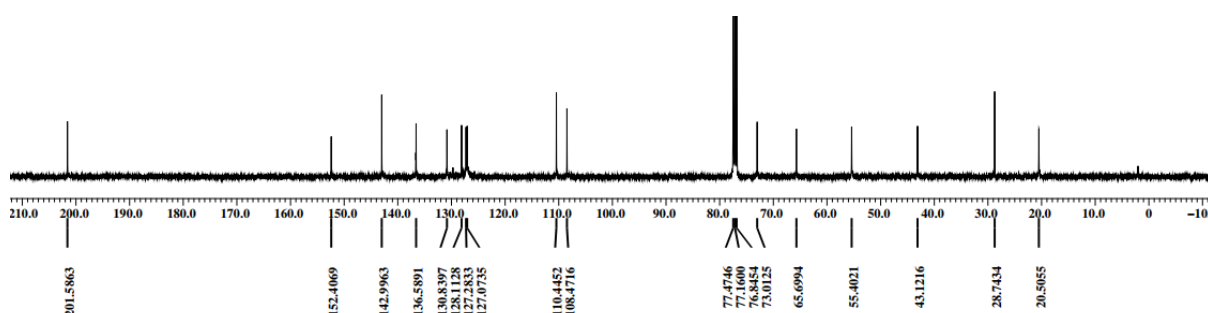

### HRMS of 4ga

#### Elemental Composition Report

Page 1

#### Single Mass Analysis

Tolerance = 5.0 PPM / DBE: min = -1.5, max = 50.0

Element prediction: Off

Number of isotope peaks used for i-FIT = 2

Monoisotopic Mass, Even Electron Ions

51 formula(e) evaluated with 1 results within limits (up to 1 closest results for each mass)

Elements Used:

C: 1-50 H: 1-100 N: 1-1 O: 1-10 79Br: 0-1

Sample Name : 25\_02\_308

IITRPR

XEVO G2-XS QTOF

Test Name :

110822\_25\_02\_308 16 (0.177)

1: TOF MS ES+

5.01e+006

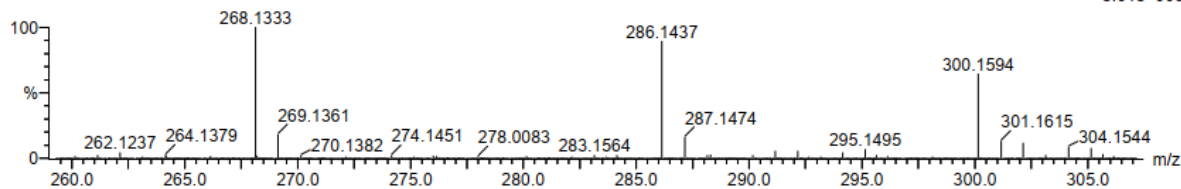

Minimum: -1.5  
Maximum: 2.0 5.0 50.0

| Mass     | Calc. Mass | mDa  | PPM  | DBE | i-FIT | Norm | Conf (%) | Formula      |
|----------|------------|------|------|-----|-------|------|----------|--------------|
| 286.1437 | 286.1443   | -0.6 | -2.1 | 8.5 | 771.9 | n/a  | n/a      | C17 H20 N O3 |

### HPLC spectra of racemic 4ga

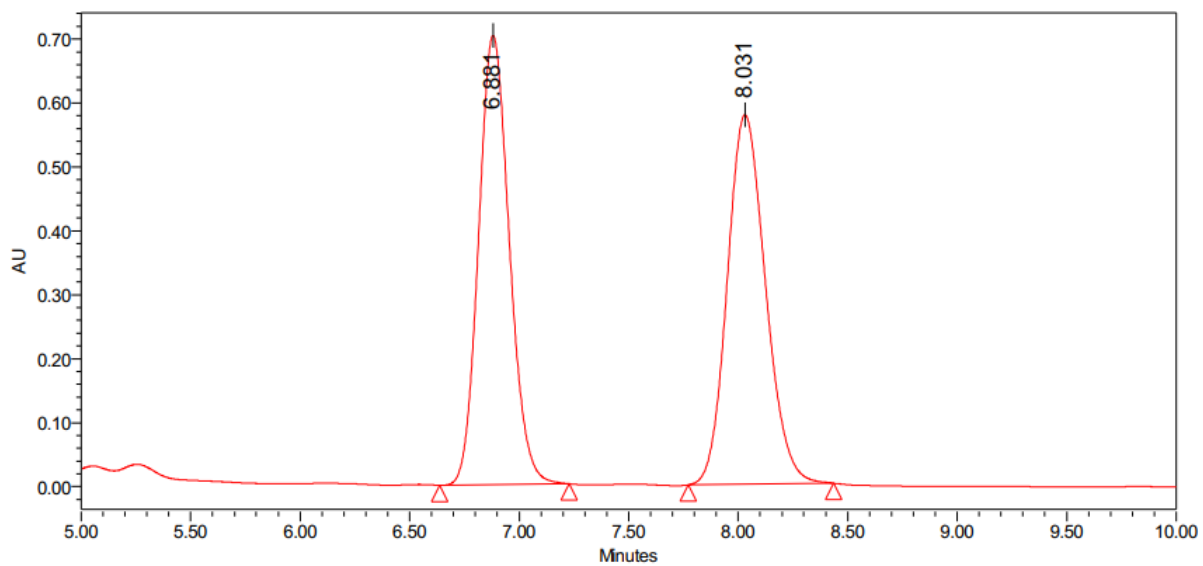

Peak Results

| Name | RT    | Area    | % Area |
|------|-------|---------|--------|
| 1    | 6.881 | 6863940 | 49.50  |
| 2    | 8.031 | 7003882 | 50.50  |

### HPLC spectra of chiral 4ga

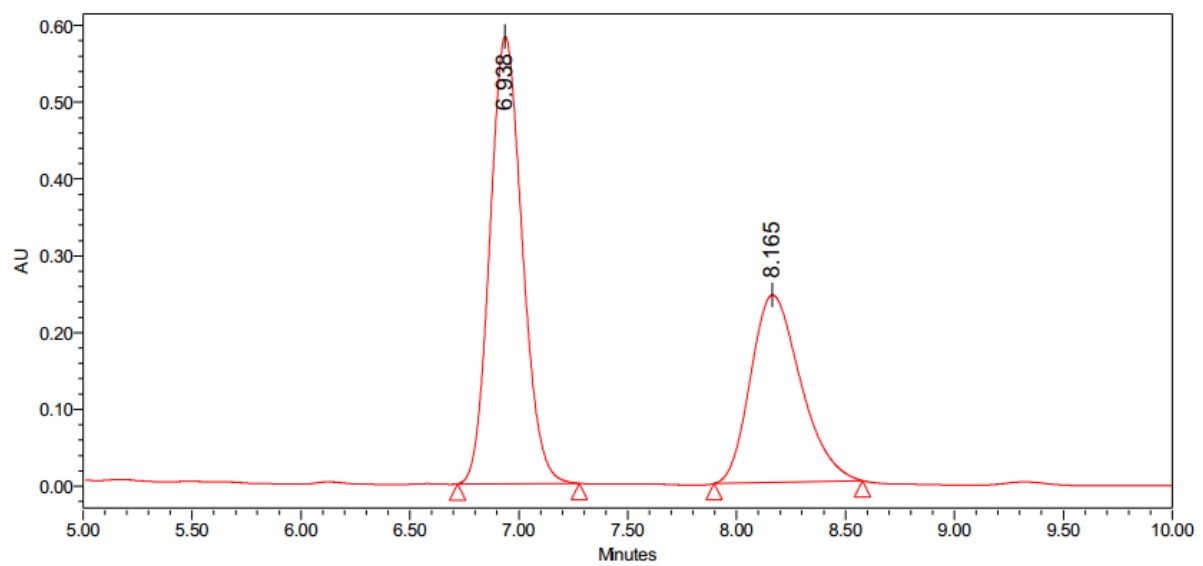

Peak Results

| Name | RT    | Area    | % Area |
|------|-------|---------|--------|
| 1    | 6.938 | 5999199 | 60.60  |
| 2    | 8.165 | 3899658 | 39.40  |

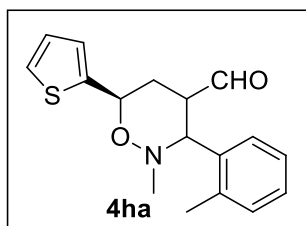

**<sup>1</sup>H-NMR (CDCl<sub>3</sub>, 400MHz) of 4ha**

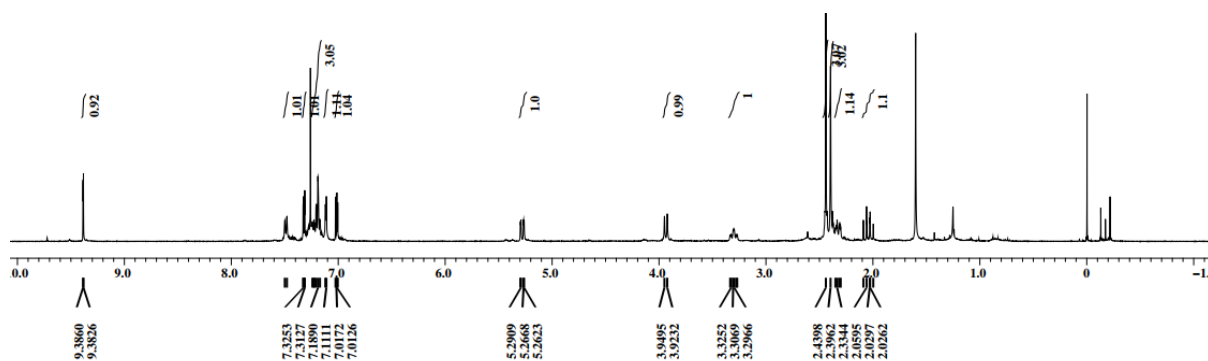

**<sup>13</sup>C-NMR (CDCl<sub>3</sub>, 100MHz) of 4ha**

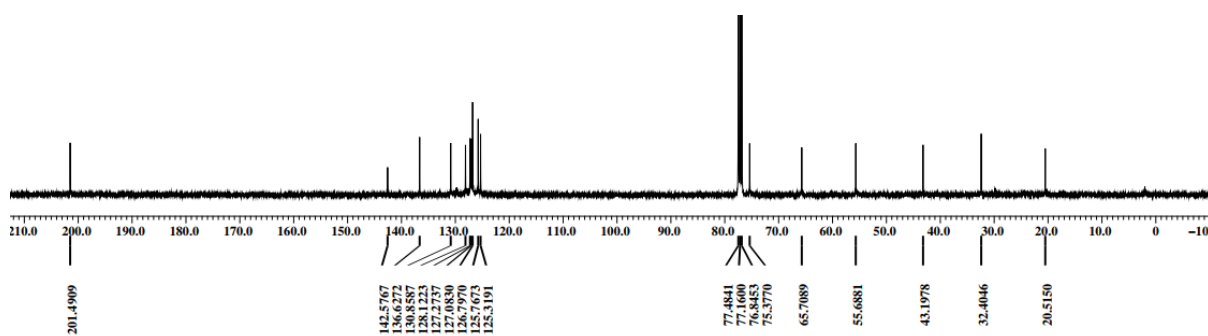

**HRMS of 4ha**

**Elemental Composition Report**

**Single Mass Analysis**

Tolerance = 5.0 PPM / DBE: min = -1.5, max = 50.0  
 Element prediction: Off  
 Number of isotope peaks used for i-FIT = 2

Monoisotopic Mass, Even Electron Ions

27 formula(e) evaluated with 1 results within limits (up to 1 closest results for each mass)

Elements Used:

C: 1-50 H: 1-100 N: 1-1 O: 1-10 S: 1-1

Sample Name : 25\_02\_329

IITRPR

XEVO G2-XS QTOF

Test Name :

110822\_25\_02\_329 12 (0.143)

1: TOF MS ES+  
8.84e+006

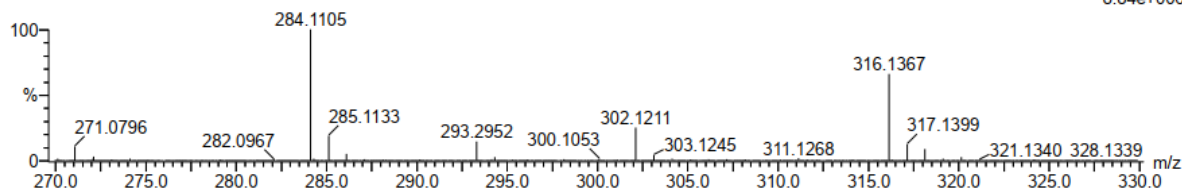

Minimum: -1.5  
 Maximum: 2.0 5.0 50.0

| Mass     | Calc. Mass | mDa  | PPM  | DBE | i-FIT | Norm | Conf (%) | Formula        |
|----------|------------|------|------|-----|-------|------|----------|----------------|
| 302.1211 | 302.1215   | -0.4 | -1.3 | 8.5 | 787.5 | n/a  | n/a      | C17 H20 N O2 S |

### HPLC spectra of racemic 4ha

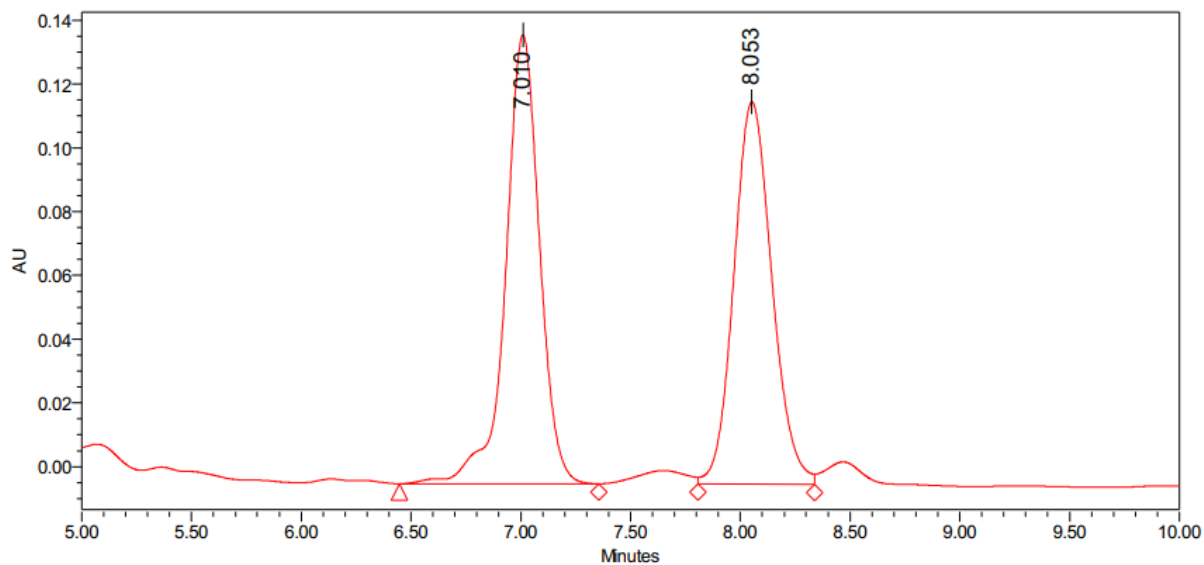

Peak Results

| Name | RT    | Area    | % Area |
|------|-------|---------|--------|
| 1    | 7.010 | 1519581 | 51.22  |
| 2    | 8.053 | 1447373 | 48.78  |

### HPLC spectra of chiral 4ha

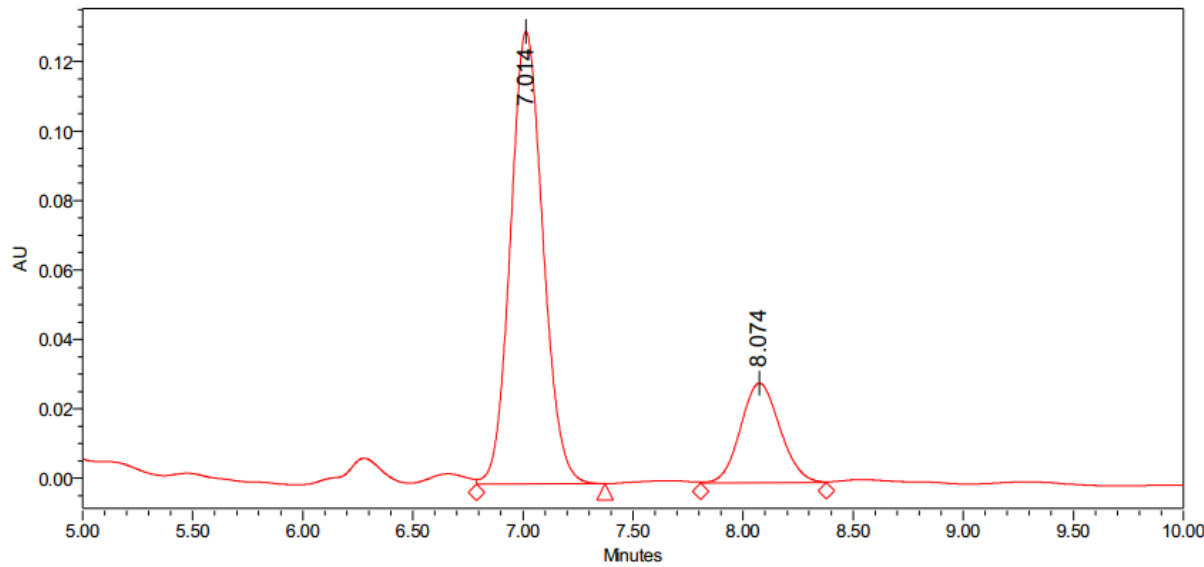

Peak Results

| Name | RT    | Area    | % Area |
|------|-------|---------|--------|
| 1    | 7.014 | 1344097 | 79.01  |
| 2    | 8.074 | 356979  | 20.99  |

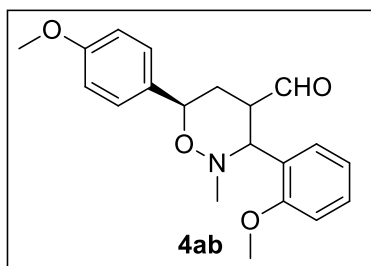

**<sup>1</sup>H-NMR (CDCl<sub>3</sub>, 400MHz) of 4ab**

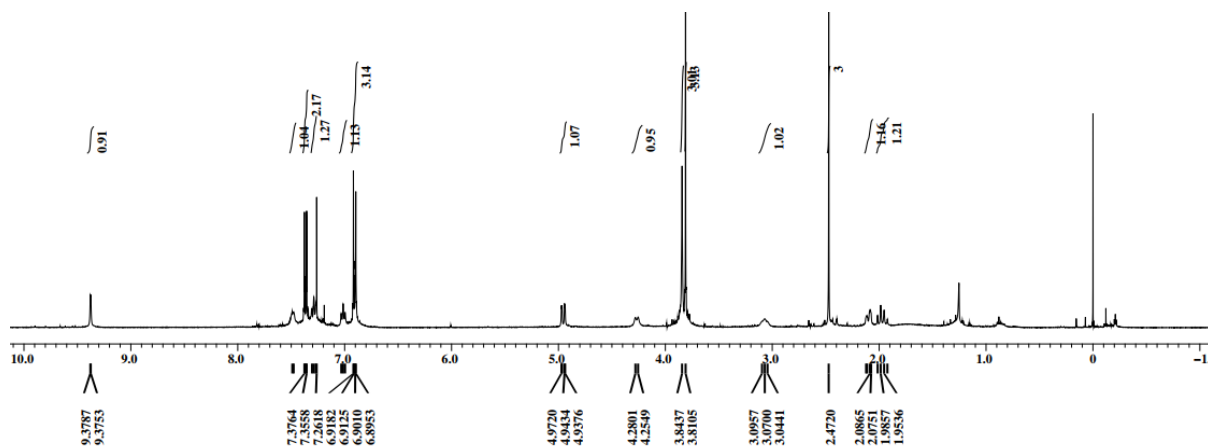

**<sup>13</sup>C-NMR (CDCl<sub>3</sub>, 100MHz) of 4ab**

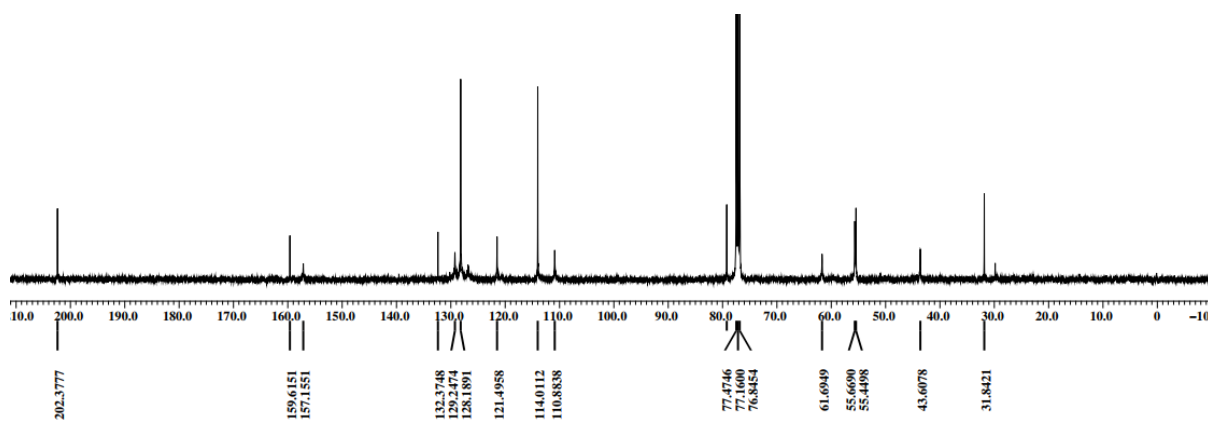

Elemental Composition Report

Single Mass Analysis

Tolerance = 5.0 PPM / DBE: min = -1.5, max = 50.0  
 Element prediction: Off  
 Number of isotope peaks used for i-FIT = 2

Monoisotopic Mass, Even Electron Ions

64 formula(e) evaluated with 1 results within limits (up to 1 closest results for each mass)

Elements Used:

C: 1-50 H: 1-100 N: 1-1 O: 1-10 79Br: 0-1

Sample Name : 25\_02\_232  
 Test Name :  
 110822\_25\_02\_232 8 (0.097)

IITRPR

XEVO G2-XS QTOF

1: TOF MS ES+  
 1.01e+007

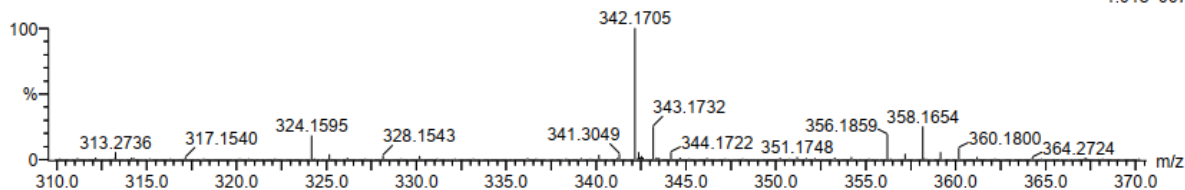

Minimum: -1.5  
 Maximum: 2.0 5.0 50.0

| Mass     | Calc. Mass | mDa | PPM | DBE | i-FIT | Norm | Conf (%) | Formula      |
|----------|------------|-----|-----|-----|-------|------|----------|--------------|
| 342.1705 | 342.1705   | 0.0 | 0.0 | 9.5 | 604.2 | n/a  | n/a      | C20 H24 N O4 |

HPLC spectra of racemic 4ab

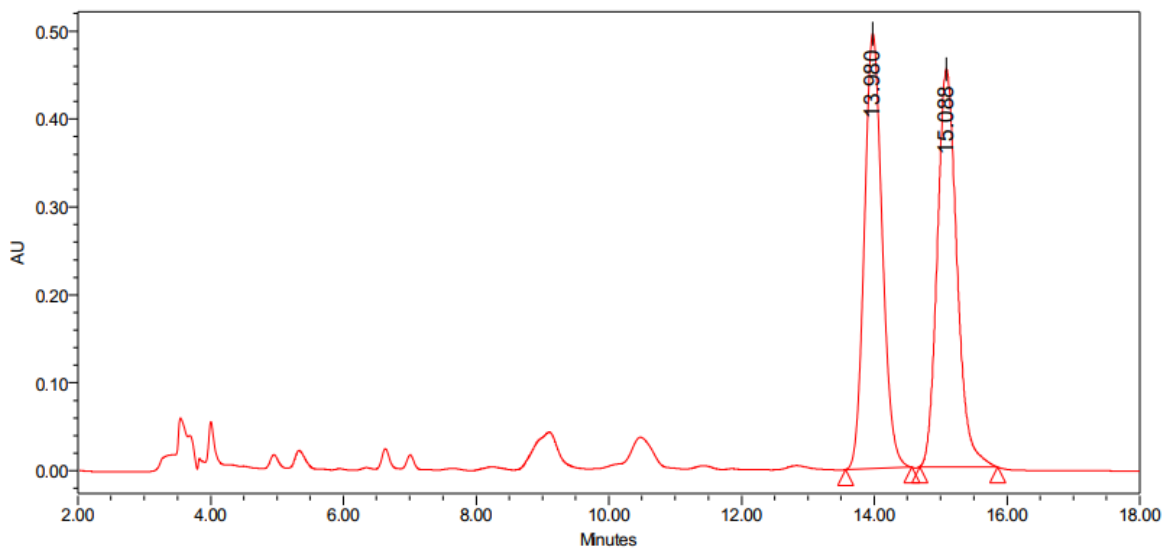

| Name | RT     | Area    | % Area |
|------|--------|---------|--------|
| 1    | 13.980 | 9249099 | 49.91  |
| 2    | 15.088 | 9281271 | 50.09  |

HPLC spectra of chiral 4ab

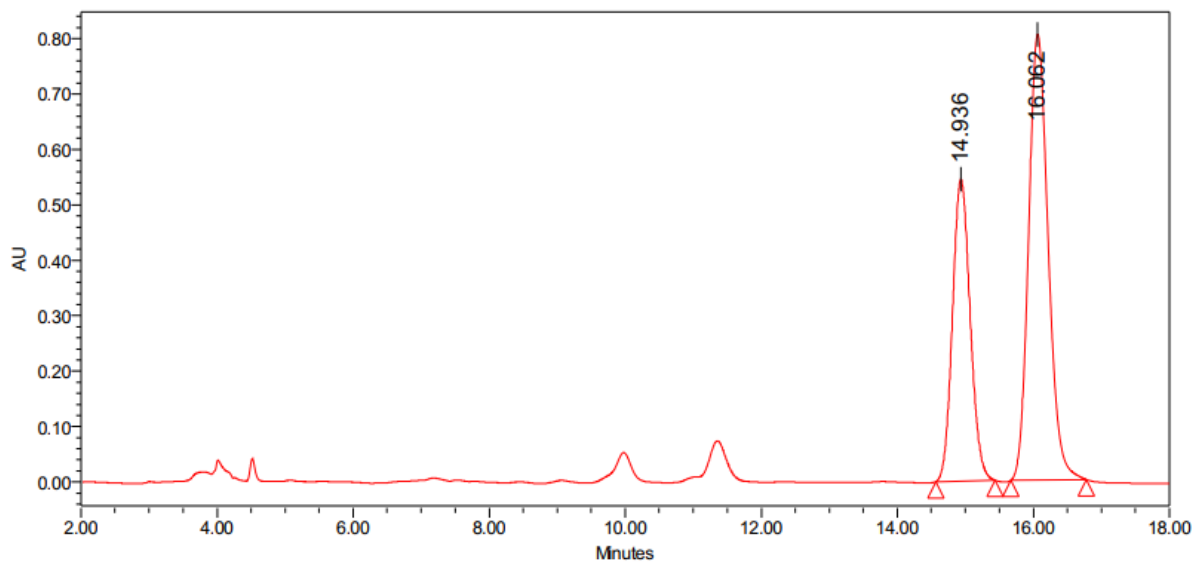

Peak Results

| Name | RT     | Area     | % Area |
|------|--------|----------|--------|
| 1    | 14.936 | 9810358  | 37.87  |
| 2    | 16.062 | 16093781 | 62.13  |

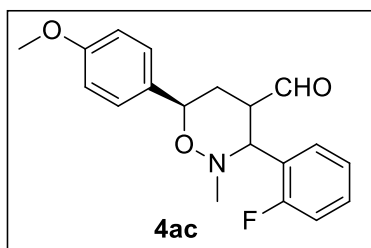

<sup>1</sup>H-NMR (CDCl<sub>3</sub>, 400MHz) of 4ac

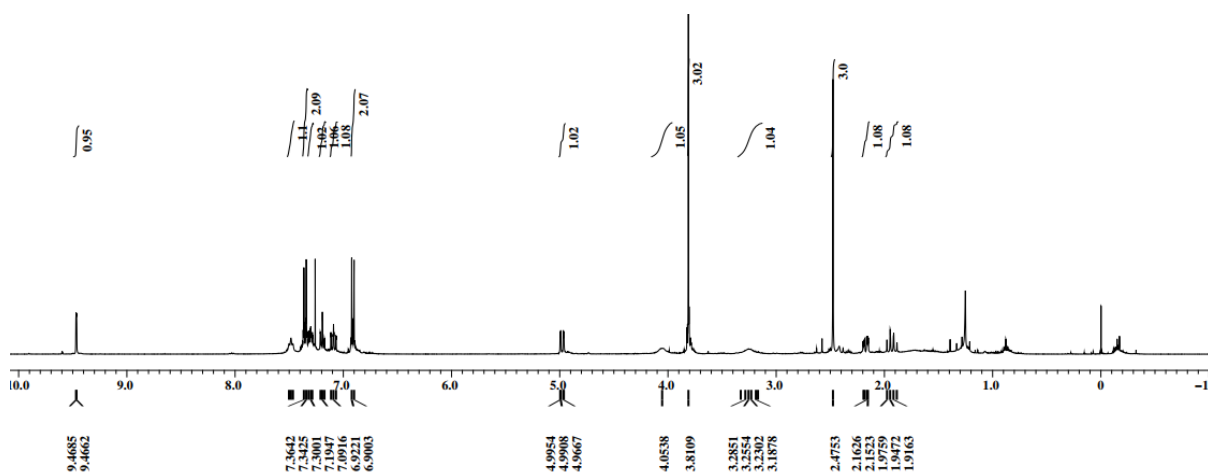



<sup>13</sup>C-NMR (CDCl<sub>3</sub>, 100MHz) of 4ac

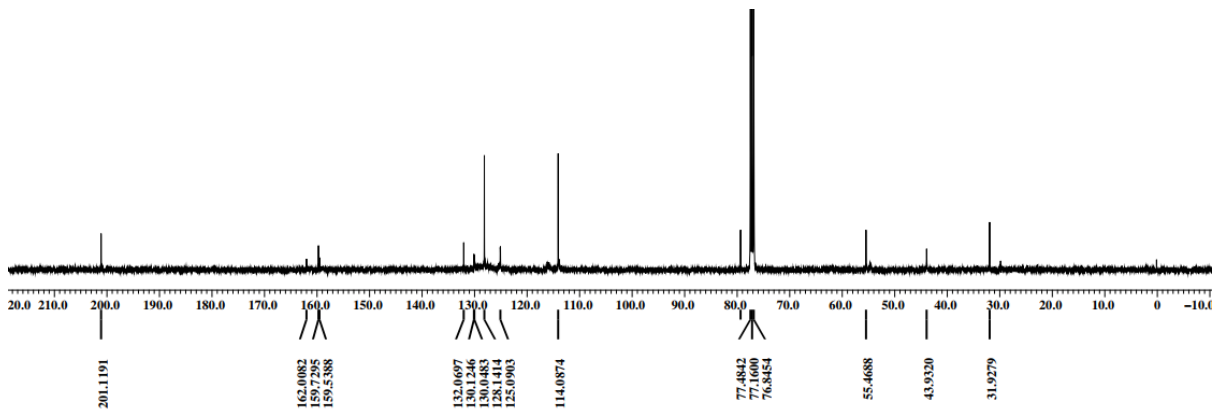

HRMS of 4ac

Elemental Composition Report

Single Mass Analysis

Tolerance = 5.0 PPM / DBE: min = -1.5, max = 50.0

Element prediction: Off

Number of isotope peaks used for i-FIT = 2

Monoisotopic Mass, Even Electron Ions

110 formula(e) evaluated with 1 results within limits (up to 1 closest results for each mass)

Elements Used:

C: 1-22 H: 1-100 N: 0-5 O: 1-5 F: 1-1

Sample Name : 25\_02\_284  
Test Name :  
080822\_25\_02\_284 21 (0.231)

IITRPR

XEVO G2-XS QTOF

1: TOF MS ES+  
9.13e+007

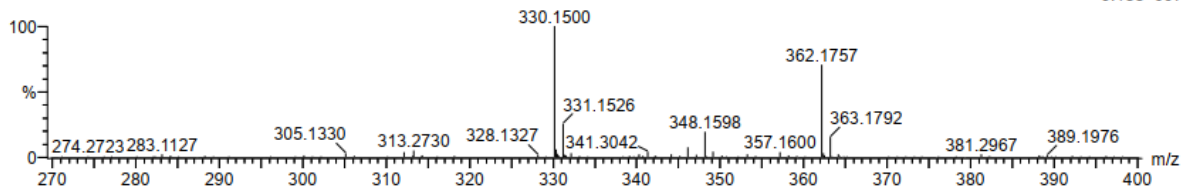

Minimum: -1.5  
Maximum: 2.0 5.0 50.0

| Mass     | Calc. Mass | mDa  | PPM  | DBE | i-FIT | Norm | Conf (%) | Formula        |
|----------|------------|------|------|-----|-------|------|----------|----------------|
| 330.1500 | 330.1505   | -0.5 | -1.5 | 9.5 | 810.9 | n/a  | n/a      | C19 H21 N O3 F |

### HPLC spectra of racemic 4ac

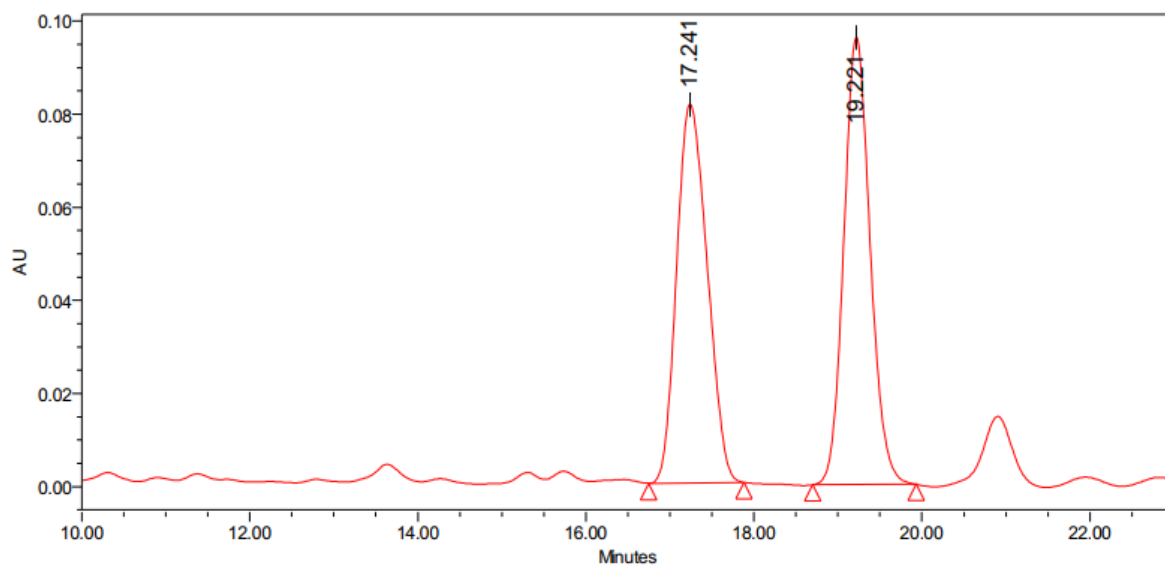

| Peak Results |        |         |        |
|--------------|--------|---------|--------|
| Name         | RT     | Area    | % Area |
| 1            | 17.241 | 2054329 | 49.55  |
| 2            | 19.221 | 2091329 | 50.45  |

### HPLC spectra of chiral 4ac

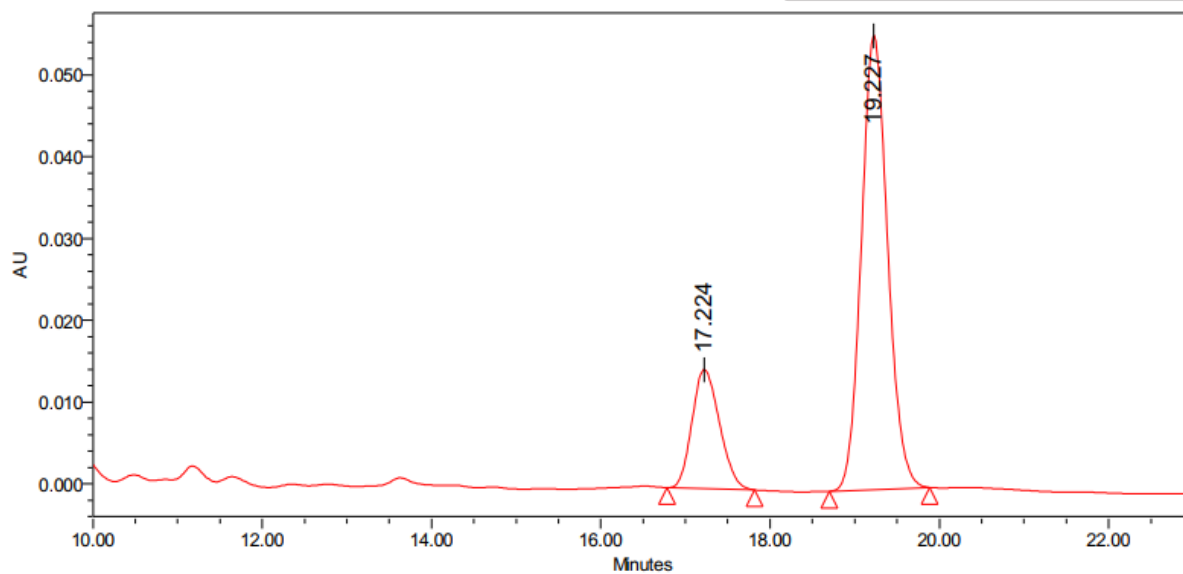

| Peak Results |        |         |        |
|--------------|--------|---------|--------|
| Name         | RT     | Area    | % Area |
| 1            | 17.224 | 329205  | 21.52  |
| 2            | 19.227 | 1200389 | 78.48  |

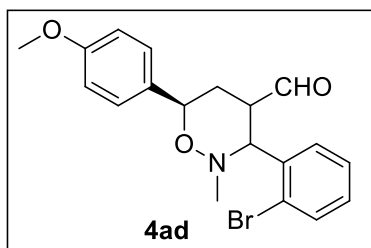

<sup>1</sup>H-NMR (CDCl<sub>3</sub>, 400MHz) of 4ad

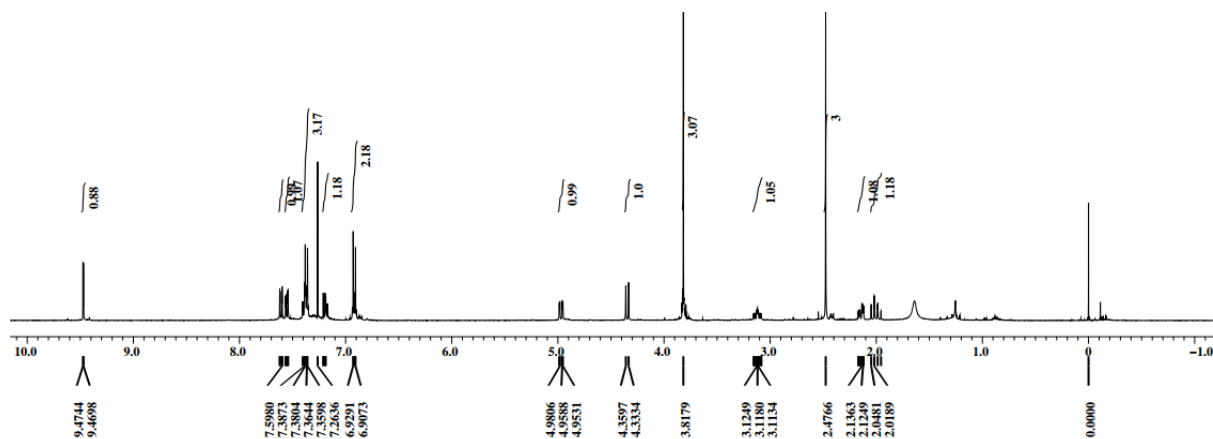

<sup>13</sup>C-NMR (CDCl<sub>3</sub>, 100MHz) of 4ad

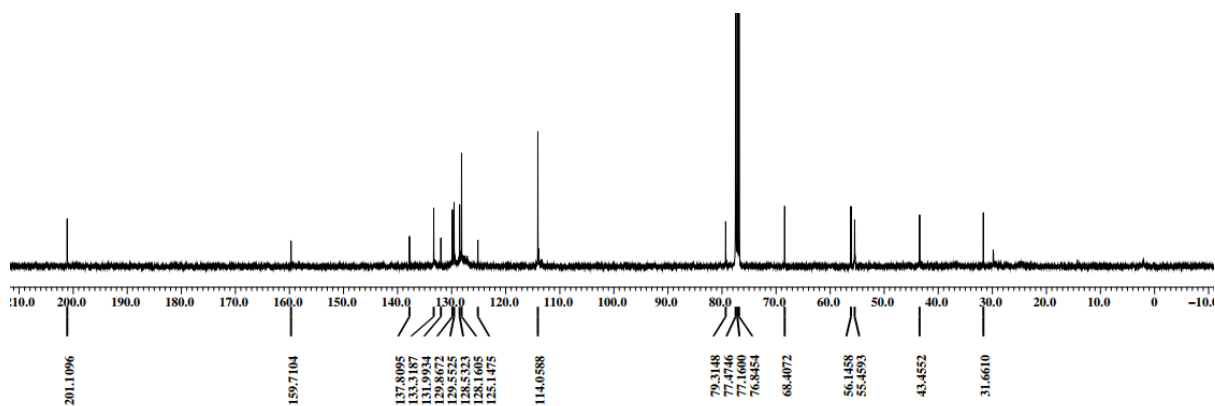

Elemental Composition Report

Single Mass Analysis

Tolerance = 5.0 PPM / DBE: min = -1.5, max = 50.0  
 Element prediction: Off  
 Number of isotope peaks used for i-FIT = 2

Monoisotopic Mass, Even Electron Ions

76 formula(e) evaluated with 1 results within limits (up to 1 closest results for each mass)

Elements Used:

C: 1-50 H: 1-100 N: 1-1 O: 1-10 79Br: 0-1

Sample Name : 25\_02\_320  
 Test Name :  
 110822\_25\_02\_320 20 (0.223)

IITRPR

XEVO G2-XS QTOF

1: TOF MS ES+  
 2.16e+006

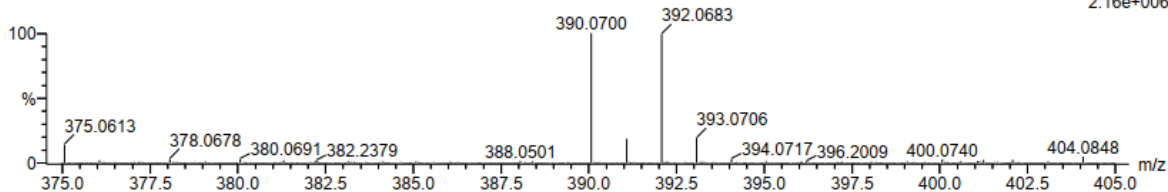

Minimum: -1.5  
 Maximum: 2.0 5.0 50.0

| Mass     | Calc. Mass | mDa  | PPM  | DBE | i-FIT | Norm | Conf (%) | Formula           |
|----------|------------|------|------|-----|-------|------|----------|-------------------|
| 390.0700 | 390.0705   | -0.5 | -1.3 | 9.5 | 580.9 | n/a  | n/a      | C19 H21 N O3 79Br |

HPLC spectra of racemic 4ad

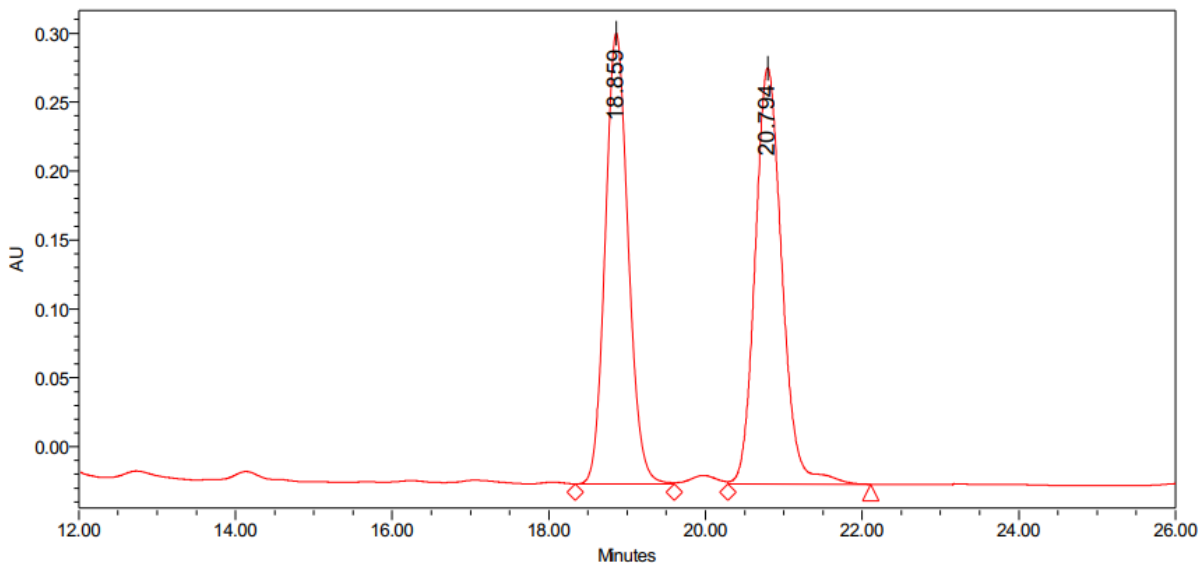

Peak Results

| Name | RT     | Area    | % Area |
|------|--------|---------|--------|
| 1    | 18.859 | 6668118 | 48.17  |
| 2    | 20.794 | 7174643 | 51.83  |

### HPLC spectra of chiral 4ad

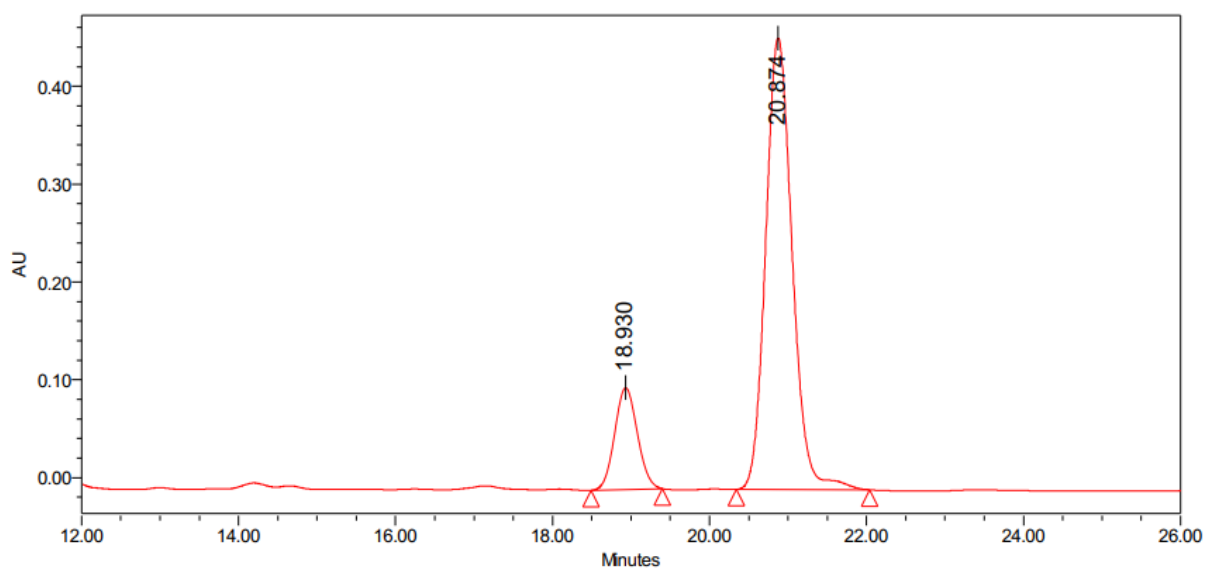

Peak Results

| Name | RT     | Area     | % Area |
|------|--------|----------|--------|
| 1    | 18.930 | 2091214  | 16.22  |
| 2    | 20.874 | 10801903 | 83.78  |

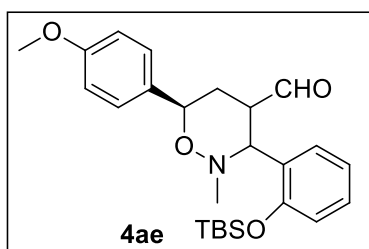

### <sup>1</sup>H-NMR (CDCl<sub>3</sub>, 400MHz) of 4ae

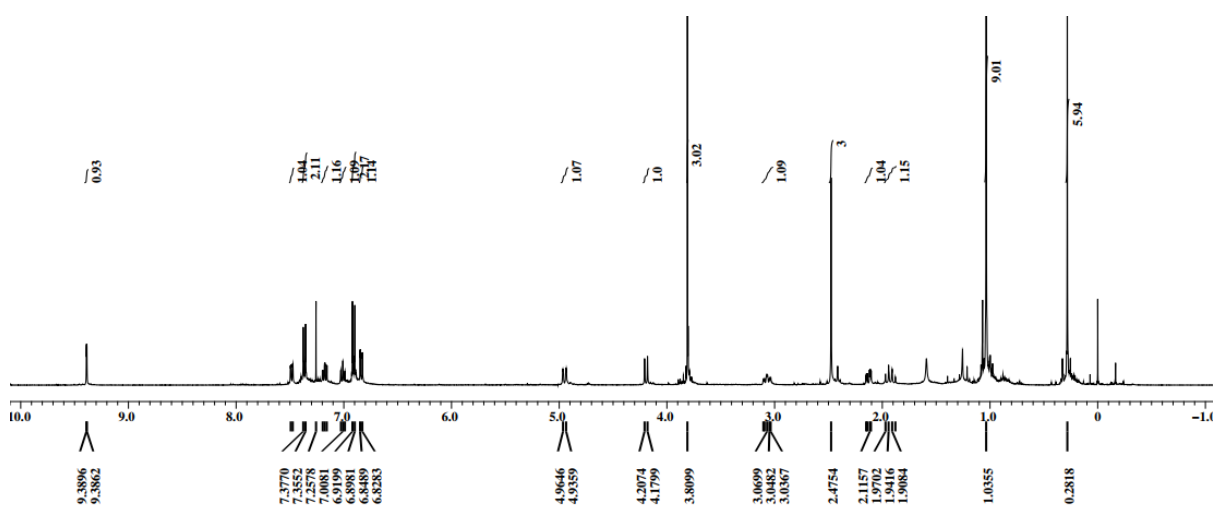

**<sup>13</sup>C-NMR (CDCl<sub>3</sub>, 100MHz) of 4ae**

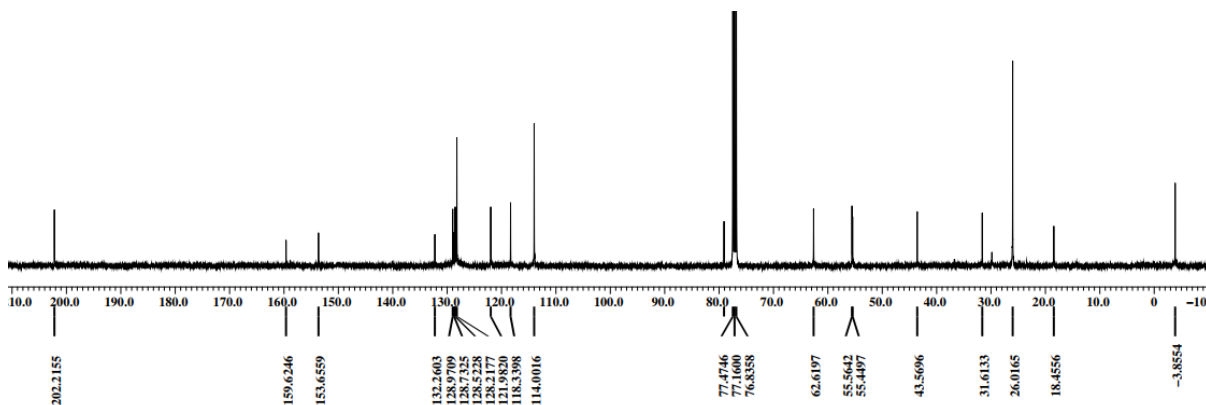

**HRMS of 4ae**

**Elemental Composition Report**

**Single Mass Analysis**

Tolerance = 5.0 mDa / DBE: min = -1.5, max = 50.0

Element prediction: Off

Number of isotope peaks used for i-FIT = 3

Monoisotopic Mass, Even Electron Ions

127 formula(e) evaluated with 1 results within limits (up to 50 closest results for each mass)

Elements Used:

C: 0-25 H: 0-50 N: 0-4 O: 0-4 Si: 0-2

050423\_25\_03\_14 20 (0.223)

IITRPR

XEVO G2-XS QTOF

Test Name :

050423\_25\_03\_14

1: TOF MS ES+

5.17e+006

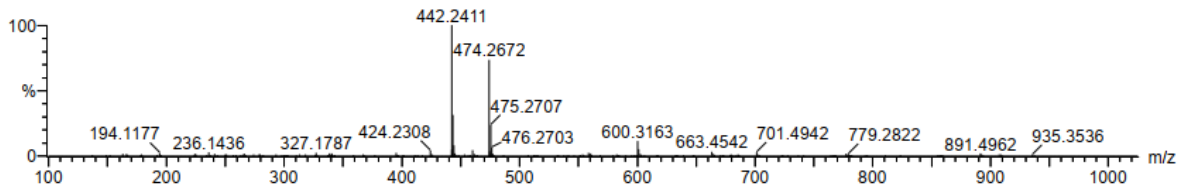

Minimum: -1.5  
Maximum: 5.0 10.0 50.0

| Mass     | Calc. Mass | mDa  | PPM  | DBE | i-FIT | Norm | Conf (%) | Formula         |
|----------|------------|------|------|-----|-------|------|----------|-----------------|
| 442.2411 | 442.2414   | -0.3 | -0.7 | 9.5 | 822.4 | n/a  | n/a      | C25 H36 N O4 Si |

### HPLC spectra of racemic 4ae

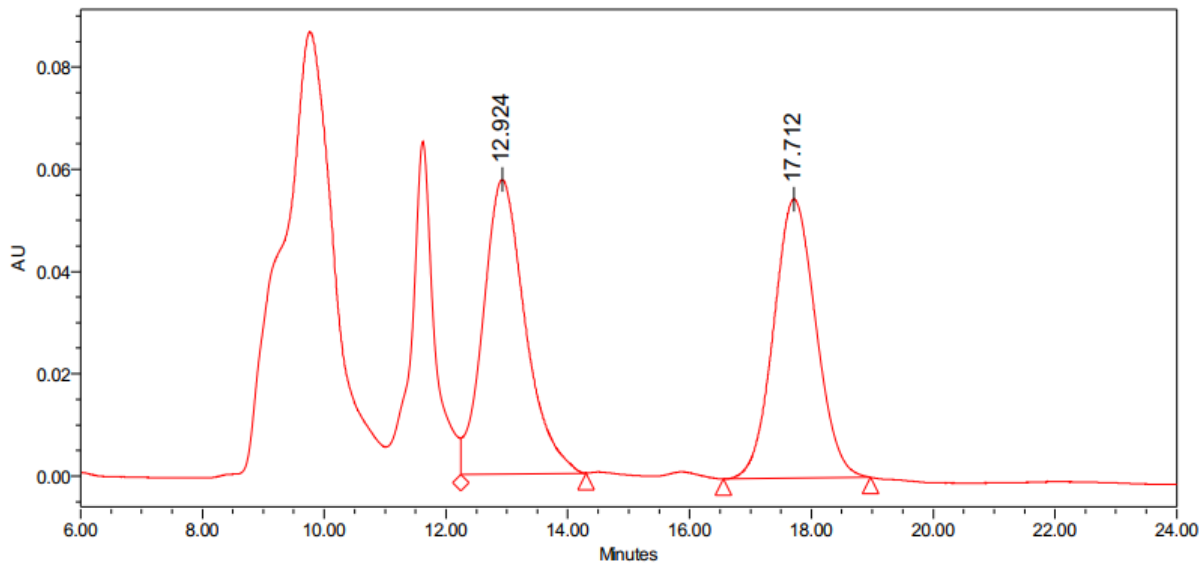

Peak Results

| Name | RT     | Area    | % Area |
|------|--------|---------|--------|
| 1    | 12.924 | 2758075 | 51.22  |
| 2    | 17.712 | 2626177 | 48.78  |

### HPLC spectra of chiral 4ae

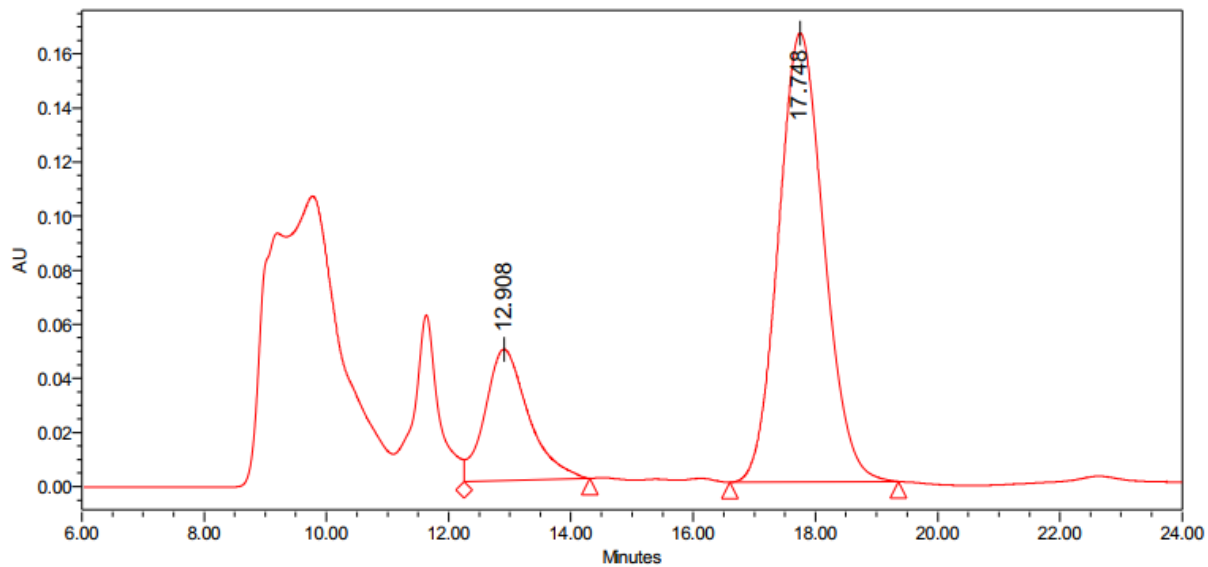

Peak Results

| Name | RT     | Area    | % Area |
|------|--------|---------|--------|
| 1    | 12.908 | 2385729 | 21.77  |
| 2    | 17.748 | 8575536 | 78.23  |

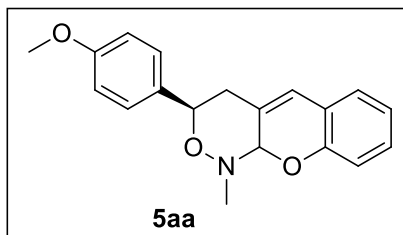

**<sup>1</sup>H-NMR (CDCl<sub>3</sub>, 400MHz) of 5aa**

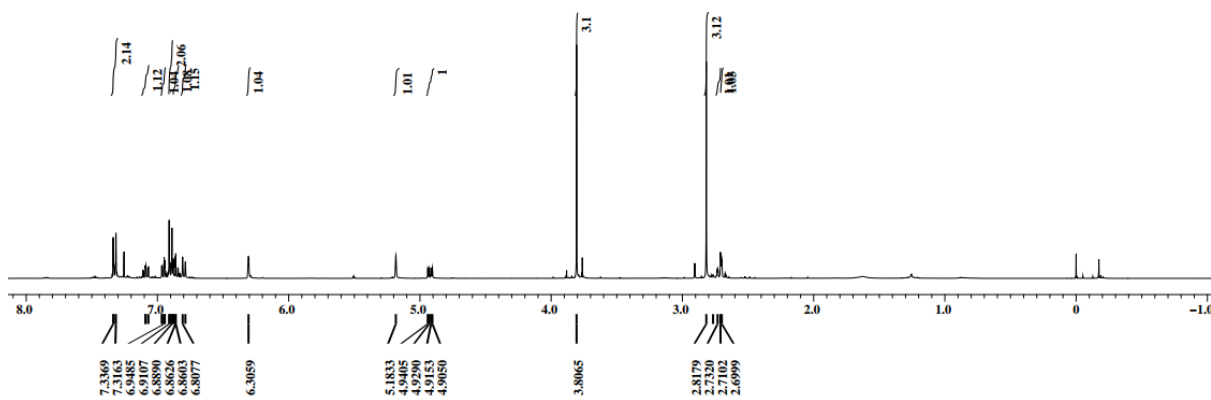

**<sup>13</sup>C-NMR (CDCl<sub>3</sub>, 100MHz) of 5aa**

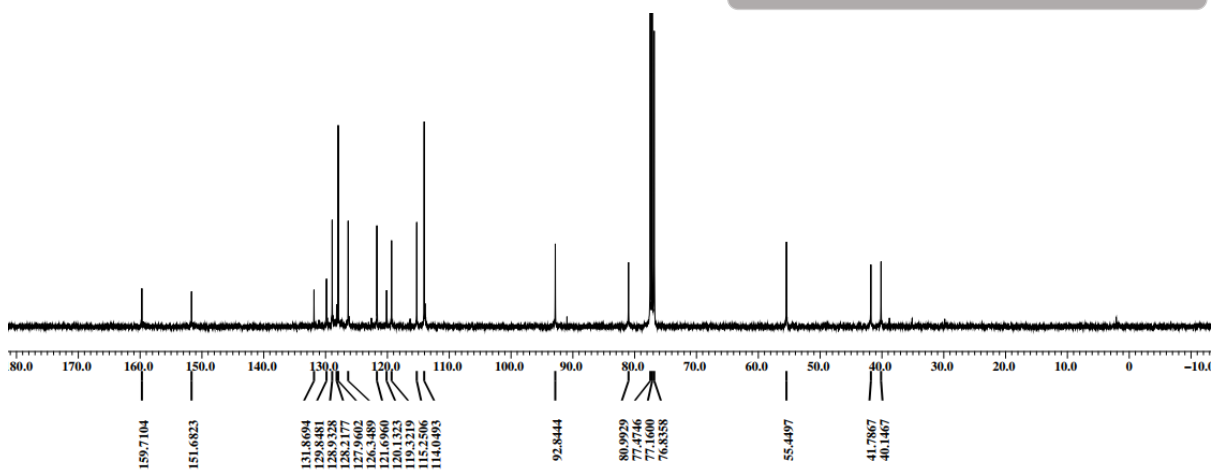



Elemental Composition Report

Single Mass Analysis

Tolerance = 5.0 mDa / DBE: min = -1.5, max = 50.0

Element prediction: Off

Number of isotope peaks used for i-FIT = 3

Monoisotopic Mass, Even Electron Ions

15 formula(e) evaluated with 1 results within limits (up to 50 best isotopic matches for each mass)

Elements Used:

C: 0-19 H: 0-40 N: 0-2 O: 0-3

281222\_25\_02\_373 18 (0.205)

IITRPR

XEVO G2-XS QTOF

Test Name :

25\_02\_373

1: TOF MS ES+

1.03e+007

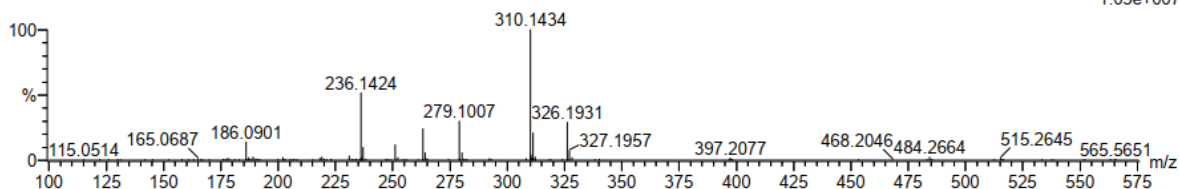

Minimum: -1.5  
Maximum: 5.0 10.0 50.0

| Mass     | Calc. Mass | mDa  | PPM  | DBE  | i-FIT  | Norm | Conf(%) | Formula      |
|----------|------------|------|------|------|--------|------|---------|--------------|
| 310.1434 | 310.1443   | -0.9 | -2.9 | 10.5 | 1179.9 | n/a  | n/a     | C19 H20 N O3 |

HPLC spectra of racemic 5aa

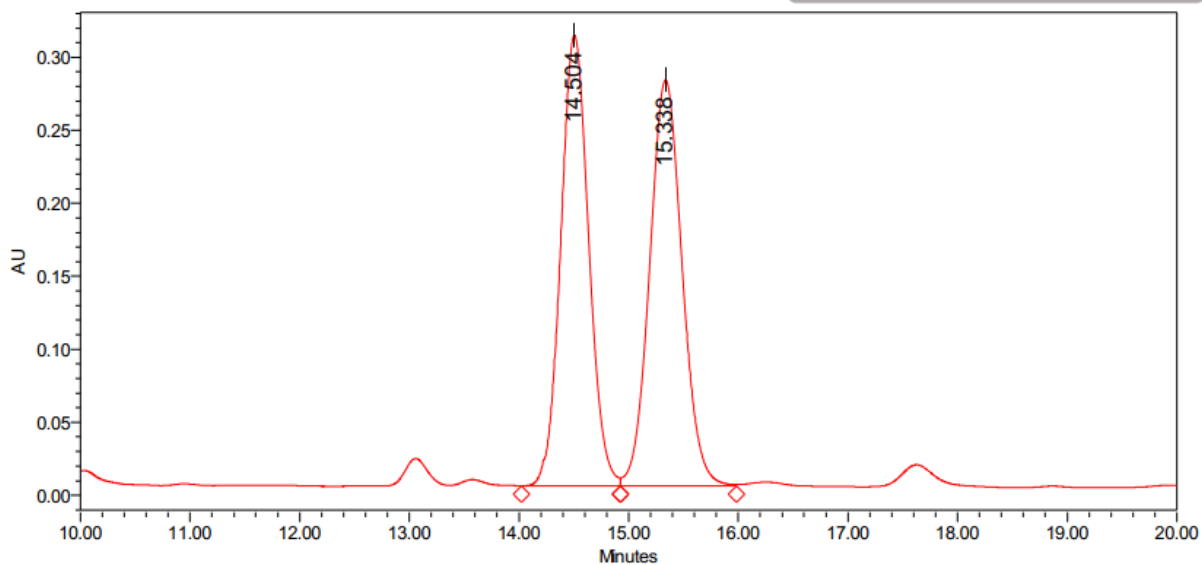

Peak Results

| Name | RT     | Area    | % Area |
|------|--------|---------|--------|
| 1    | 14.504 | 5478043 | 48.91  |
| 2    | 15.338 | 5722825 | 51.09  |

HPLC spectra of chiral 5aa

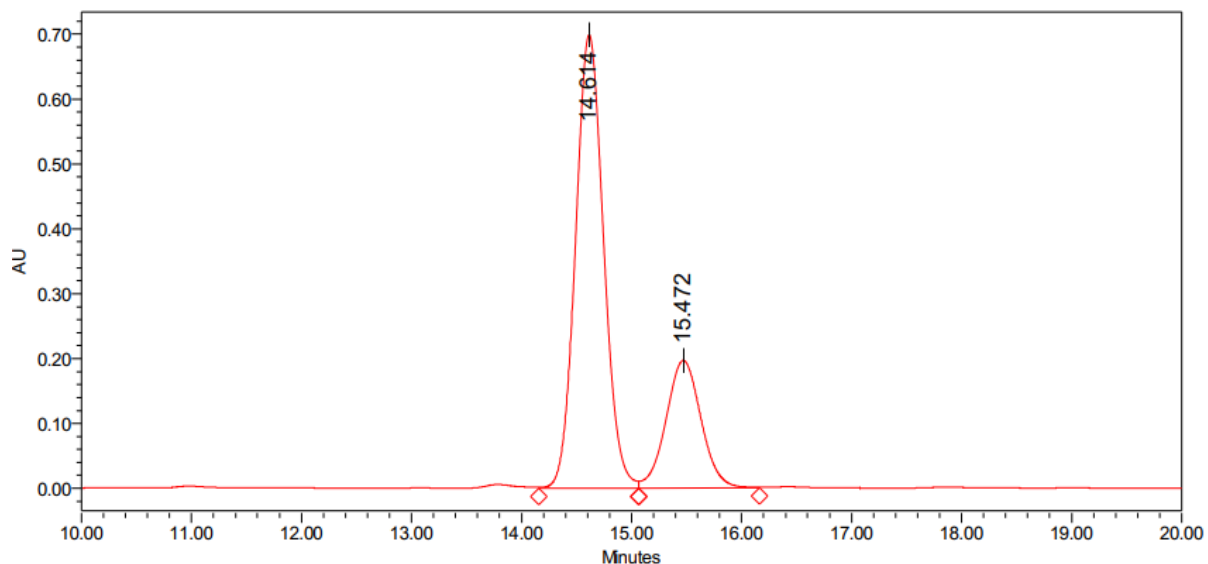

Peak Results

| Name | RT     | Area     | % Area |
|------|--------|----------|--------|
| 1    | 14.614 | 12404132 | 74.06  |
| 2    | 15.472 | 4345400  | 25.94  |

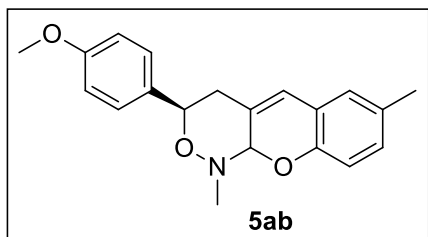

<sup>1</sup>H-NMR (CDCl<sub>3</sub>, 400MHz) of 5ab

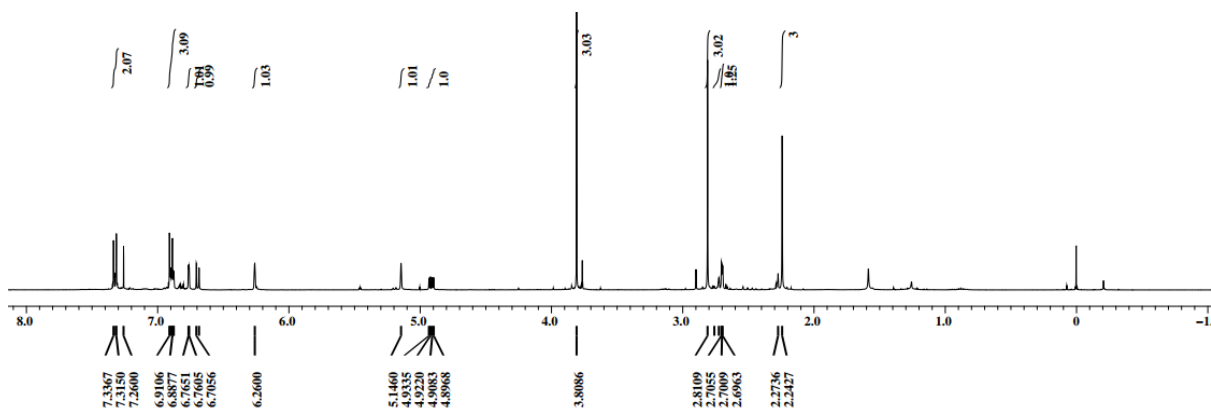

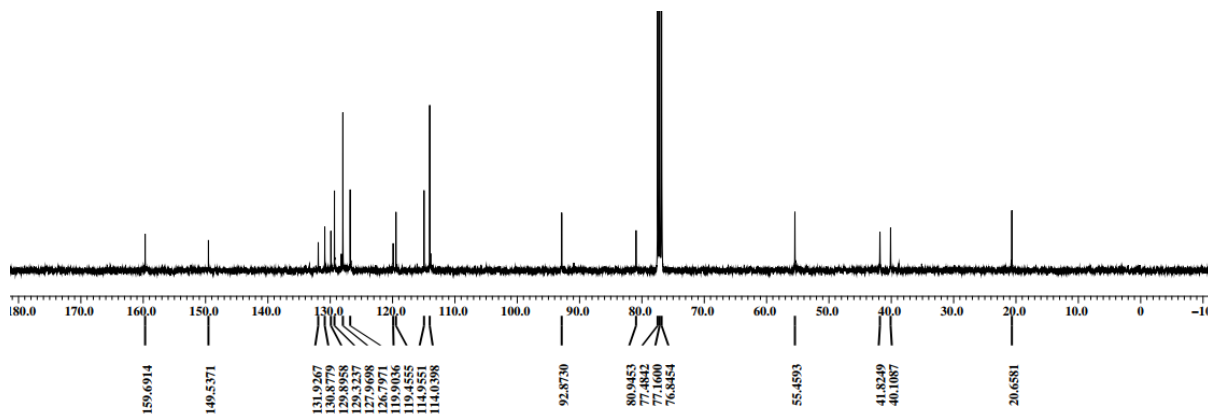

HRMS of 5ab

Elemental Composition Report

Single Mass Analysis

Tolerance = 5.0 mDa / DBE: min = -1.5, max = 50.0

Element prediction: Off

Number of isotope peaks used for i-FIT = 3

Monoisotopic Mass, Even Electron Ions

76 formula(e) evaluated with 1 results within limits (up to 50 closest results for each mass)

Elements Used:

C: 0-21 H: 0-50 N: 0-4 O: 0-4

130123\_25\_02\_385 71 (0.729)

IITRPR

XEVO G2-XS QTOF

130123\_25\_02\_385

Test Name :

1: TOF MS ES+

2.86e+005

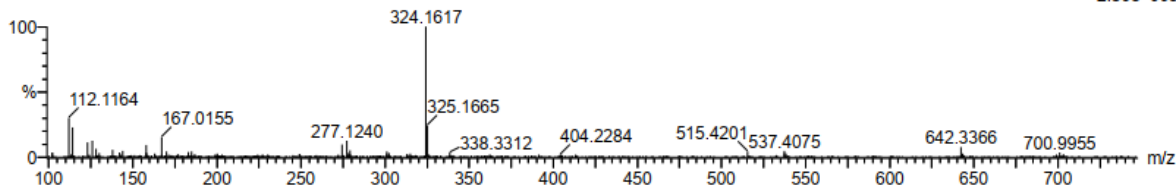

Minimum: -1.5  
Maximum: 5.0 10.0 50.0

| Mass     | Calc. Mass | mDa | PPM | DBE  | i-FIT | Norm | Conf (%) | Formula      |
|----------|------------|-----|-----|------|-------|------|----------|--------------|
| 324.1617 | 324.1600   | 1.7 | 5.2 | 10.5 | 687.4 | n/a  | n/a      | C20 H22 N O3 |

### HPLC spectra of racemic 5ab

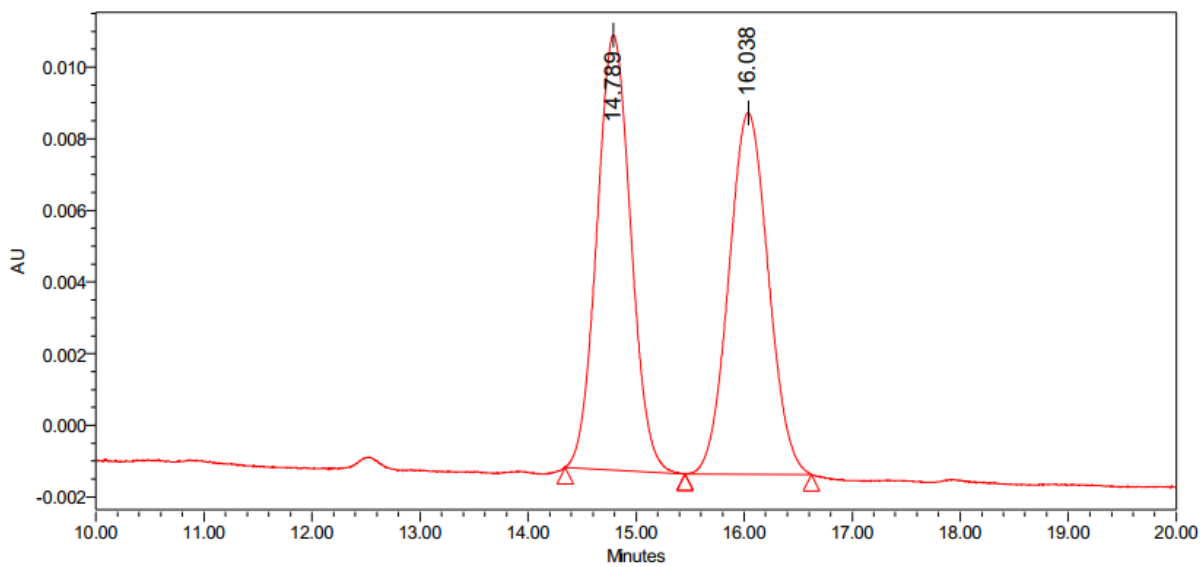

Peak Results

| Name | RT     | Area   | % Area |
|------|--------|--------|--------|
| 1    | 14.789 | 264946 | 50.77  |
| 2    | 16.038 | 256866 | 49.23  |

### HPLC spectra of chiral 5ab

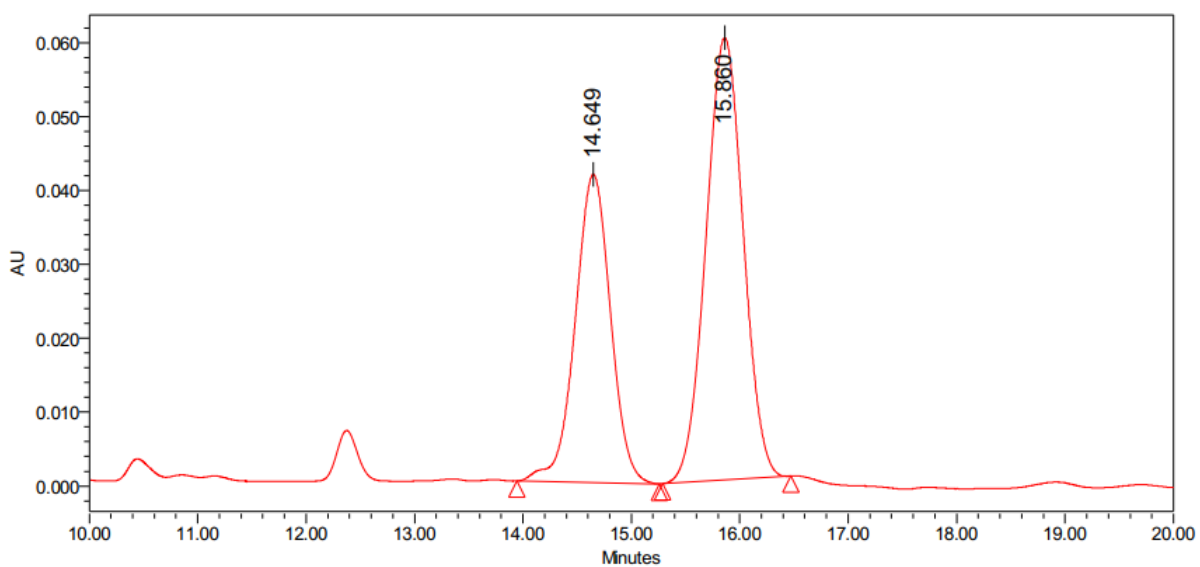

Peak Results

| Name | RT     | Area    | % Area |
|------|--------|---------|--------|
| 1    | 14.649 | 947804  | 39.88  |
| 2    | 15.860 | 1428604 | 60.12  |

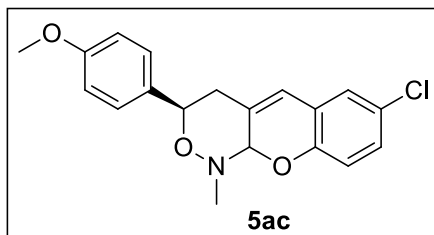

**<sup>1</sup>H-NMR (CDCl<sub>3</sub>, 400MHz) of 5ac**

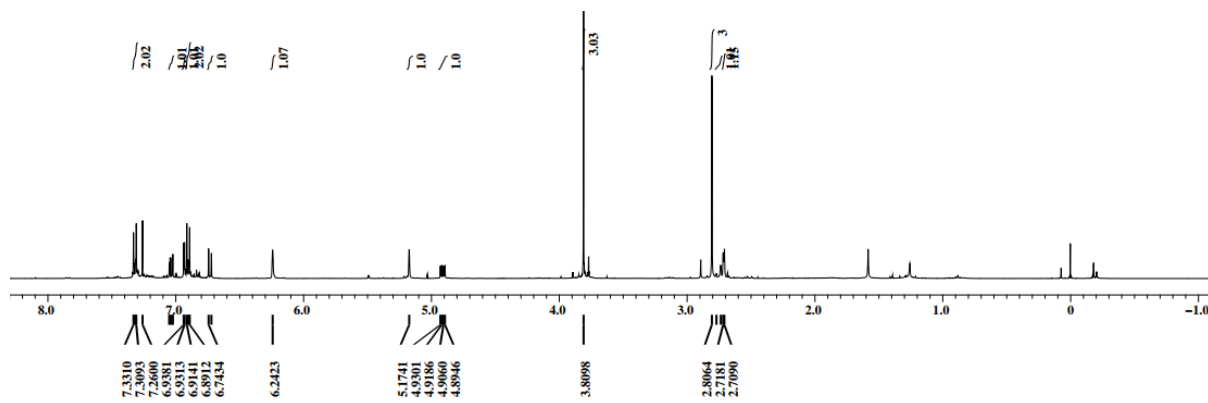

**<sup>13</sup>C-NMR (CDCl<sub>3</sub>, 100MHz) of 5ac**

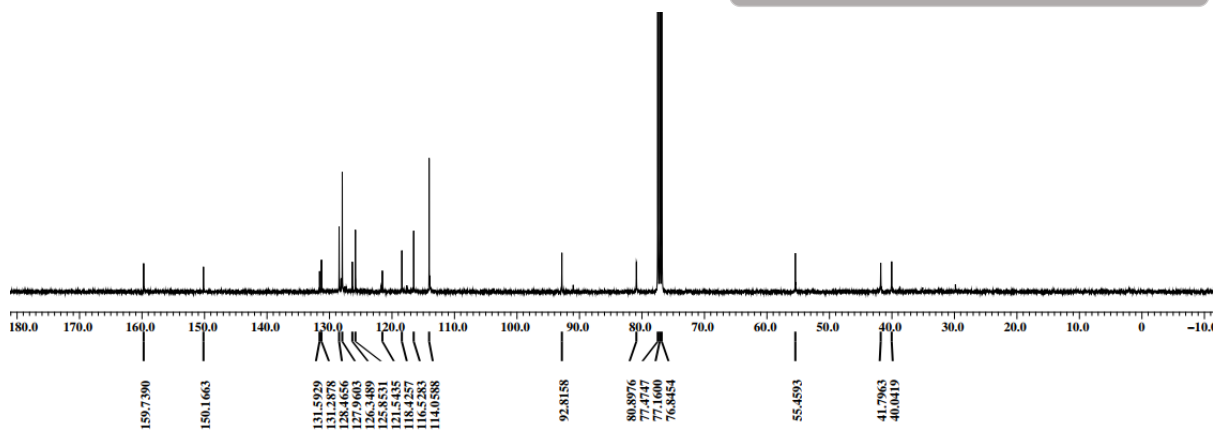

Elemental Composition Report

Single Mass Analysis

Tolerance = 5.0 mDa / DBE: min = -1.5, max = 50.0  
 Element prediction: Off  
 Number of isotope peaks used for i-FIT = 3

Monoisotopic Mass, Even Electron Ions

16 formula(e) evaluated with 1 results within limits (up to 50 closest results for each mass)

Elements Used:

C: 0-19 H: 0-40 N: 0-1 O: 0-3 Cl: 0-1

090123\_25\_02\_380 20 (0.223)

Test Name :

1: TOF MS ES+

IITRPR

XEVO G2-XS QTOF  
 090123\_25\_02\_380

2.79e+006

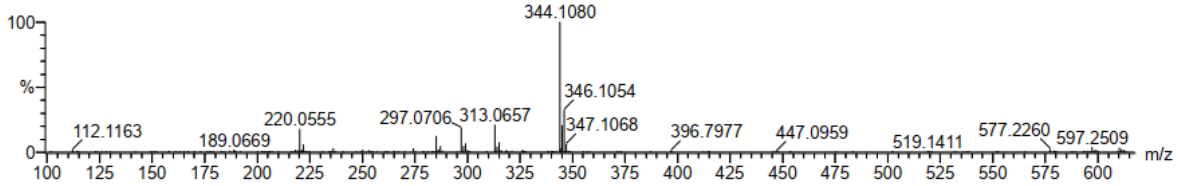

Minimum: -1.5  
 Maximum: 5.0 10.0 50.0

| Mass     | Calc. Mass | mDa | PPM | DBE  | i-FIT | Norm | Conf (%) | Formula         |
|----------|------------|-----|-----|------|-------|------|----------|-----------------|
| 344.1080 | 344.1053   | 2.7 | 7.8 | 10.5 | 974.0 | n/a  | n/a      | C19 H19 N O3 Cl |

HPLC spectra of racemic 5ac

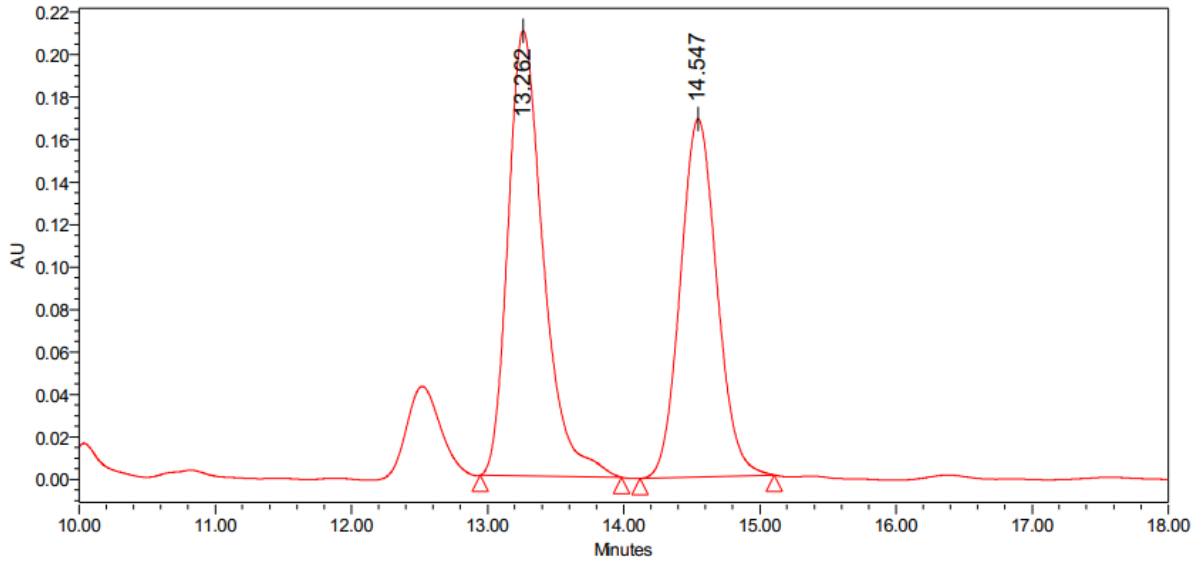

Peak Results

| Name | RT     | Area    | % Area |
|------|--------|---------|--------|
| 1    | 13.262 | 3769812 | 54.53  |
| 2    | 14.547 | 3144090 | 45.47  |

## HPLC spectra of chiral 5ac

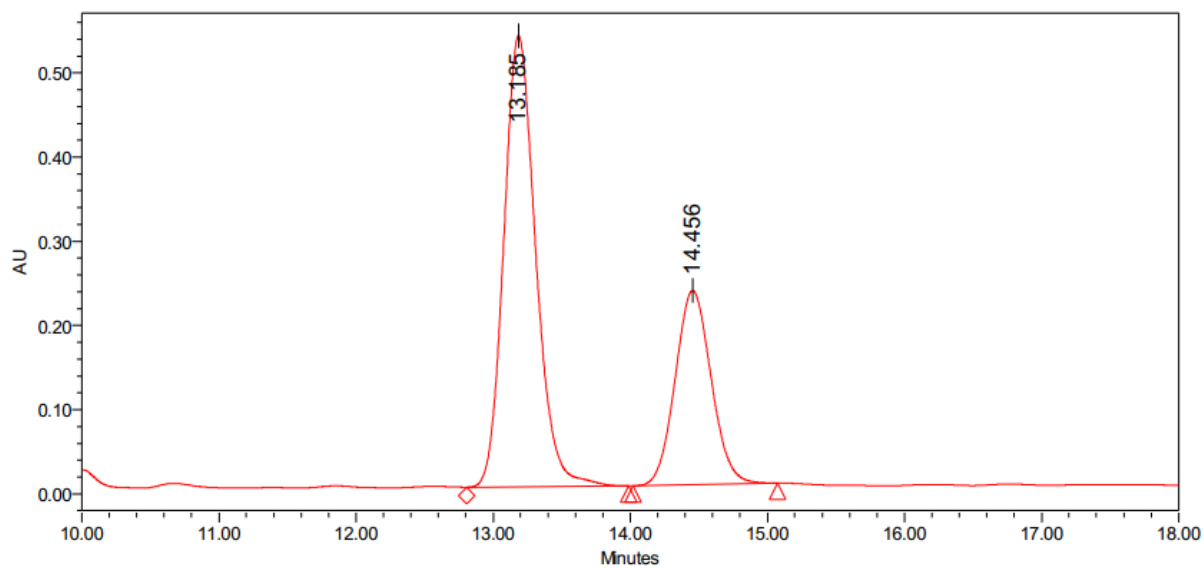

Peak Results

| Name | RT     | Area    | % Area |
|------|--------|---------|--------|
| 1    | 13.185 | 8662641 | 67.37  |
| 2    | 14.456 | 4196042 | 32.63  |

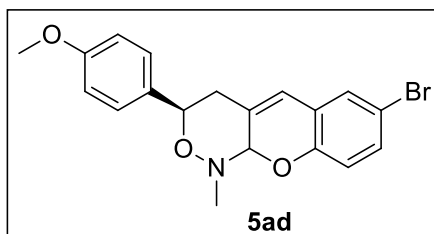

## <sup>1</sup>H-NMR (CDCl<sub>3</sub>, 400MHz) of 5ad

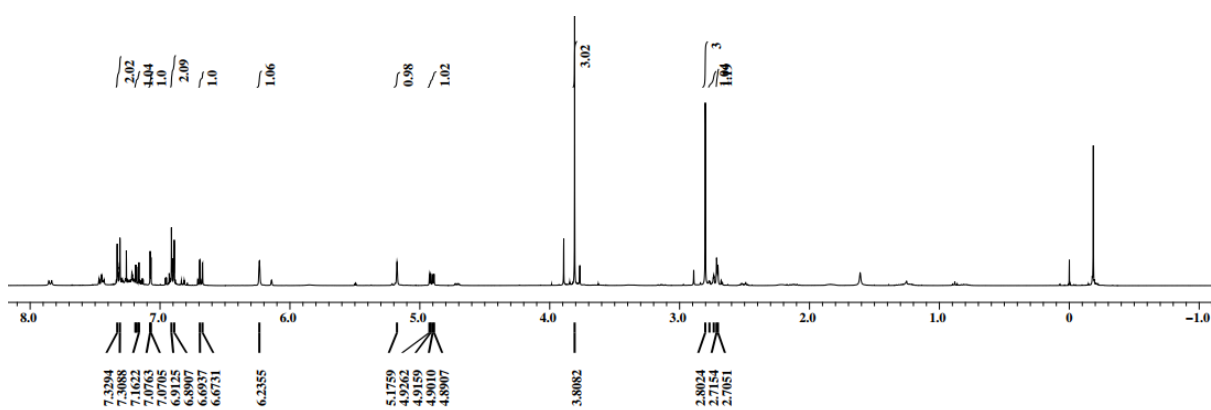

**<sup>13</sup>C-NMR (CDCl<sub>3</sub>, 100MHz) of 5ad**

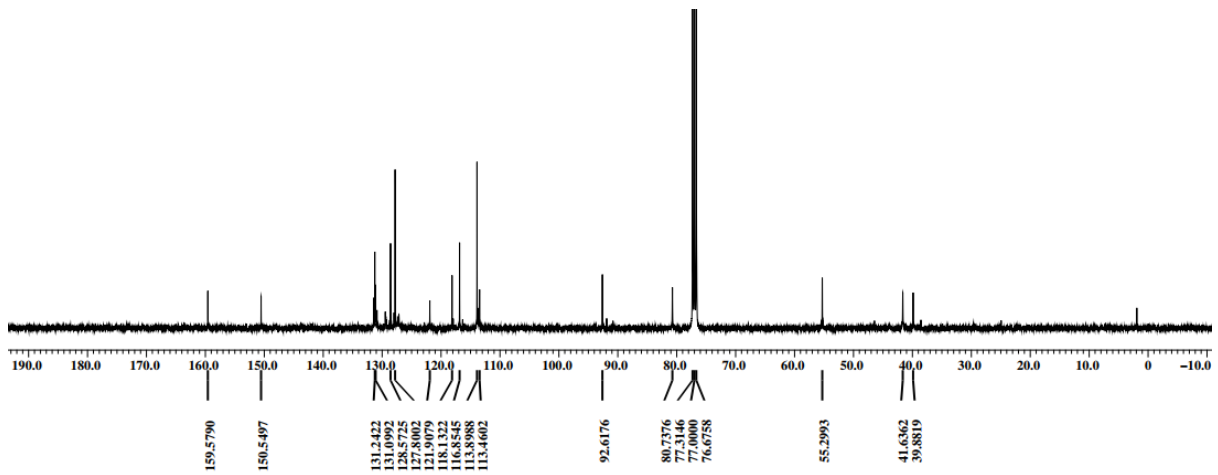

**HRMS of 5ad**

**Elemental Composition Report**

Page 1

**Single Mass Analysis**

Tolerance = 5.0 mDa / DBE: min = -1.5, max = 50.0

Element prediction: Off

Number of isotope peaks used for i-FIT = 3

Monoisotopic Mass, Even Electron Ions

71 formula(e) evaluated with 1 results within limits (up to 50 closest results for each mass)

Elements Used:

C: 0-19 H: 0-50 N: 0-2 O: 0-3 Br: 0-2

300123\_25\_03\_03 40 (0.417)

IITRPR

XEVO G2-XS QTOF

Test Name :

300123\_25\_03\_03

1: TOF MS ES+

2.22e+005

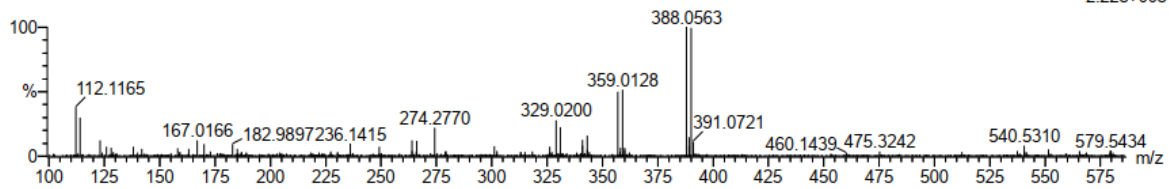

Minimum: -1.5  
Maximum: 5.0 10.0 50.0

| Mass     | Calc. Mass | mDa | PPM | DBE  | i-FIT | Norm | Conf (%) | Formula         |
|----------|------------|-----|-----|------|-------|------|----------|-----------------|
| 388.0563 | 388.0548   | 1.5 | 3.9 | 10.5 | 713.8 | n/a  | n/a      | C19 H19 N O3 Br |



### HPLC spectra of racemic 5ad

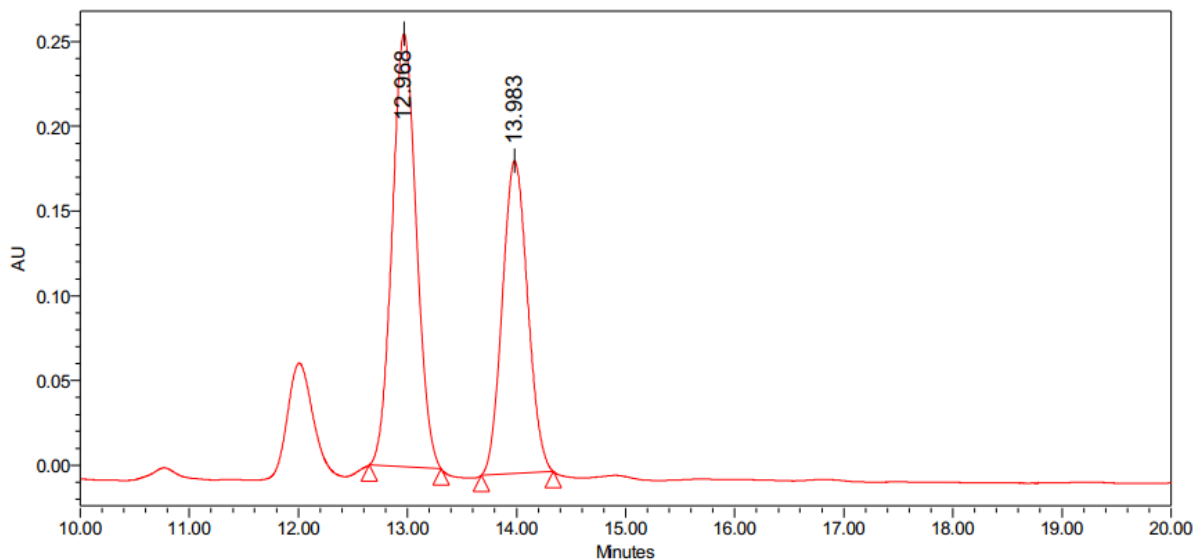

Peak Results

| Name | RT     | Area    | % Area |
|------|--------|---------|--------|
| 1    | 12.968 | 3921290 | 57.01  |
| 2    | 13.983 | 2956730 | 42.99  |

### HPLC spectra of chiral 5ad

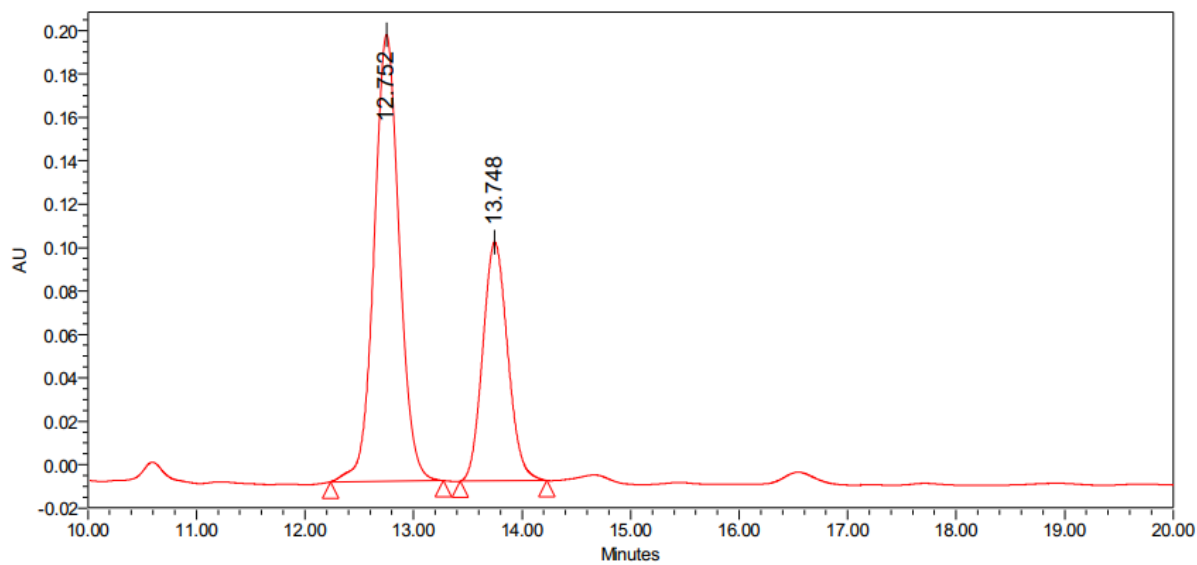

Peak Results

| Name | RT     | Area    | % Area |
|------|--------|---------|--------|
| 1    | 12.752 | 3314501 | 65.37  |
| 2    | 13.748 | 1755519 | 34.63  |

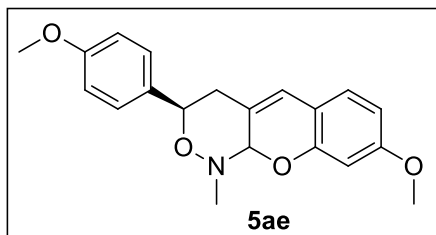

**<sup>1</sup>H-NMR (CDCl<sub>3</sub>, 400MHz) of 5ae**

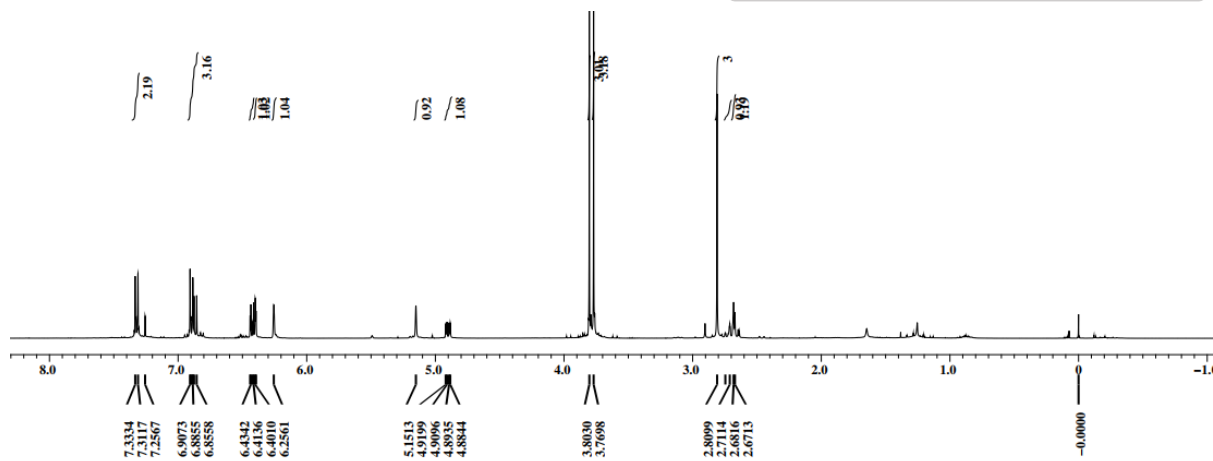

**<sup>13</sup>C-NMR (CDCl<sub>3</sub>, 100MHz) of 5ae**

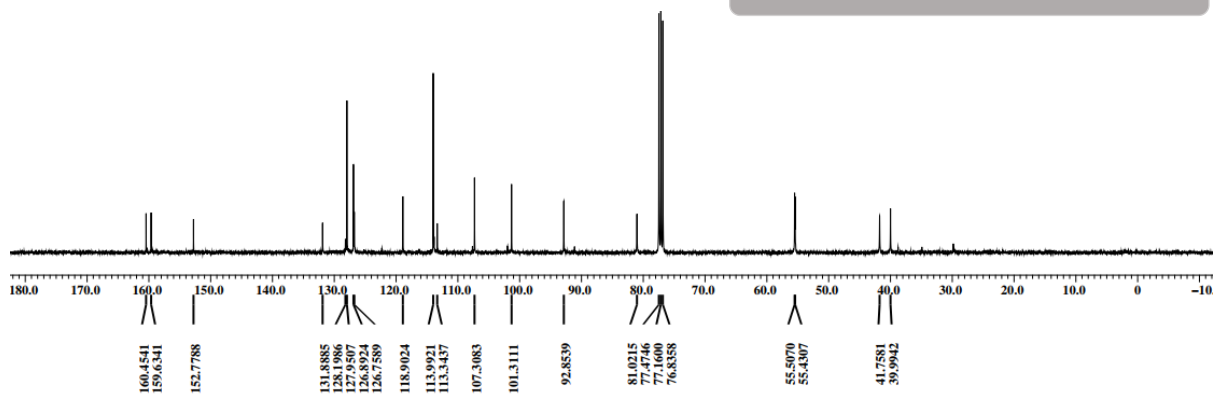

Elemental Composition Report

Single Mass Analysis

Tolerance = 5.0 mDa / DBE: min = -1.5, max = 50.0  
Element prediction: Off  
Number of isotope peaks used for i-FIT = 3

Monoisotopic Mass, Even Electron Ions  
38 formula(e) evaluated with 1 results within limits (up to 50 closest results for each mass)

Elements Used:

C: 0-20 H: 0-100 N: 0-3 O: 0-4

130223\_25\_03\_07 53 (0.551)

IITRPR

XEVO G2-XS QTOF

Test Name :

130223\_25\_03\_07

1: TOF MS ES+

6.73e+006

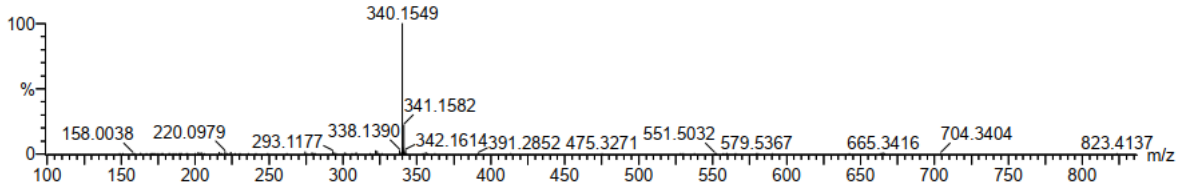

Minimum: -1.5  
Maximum: 5.0 10.0 50.0

| Mass     | Calc. Mass | mDa | PPM | DBE  | i-FIT  | Norm | Conf (%) | Formula      |
|----------|------------|-----|-----|------|--------|------|----------|--------------|
| 340.1549 | 340.1549   | 0.0 | 0.0 | 10.5 | 1038.2 | n/a  | n/a      | C20 H22 N O4 |

HPLC spectra of racemic 5ae

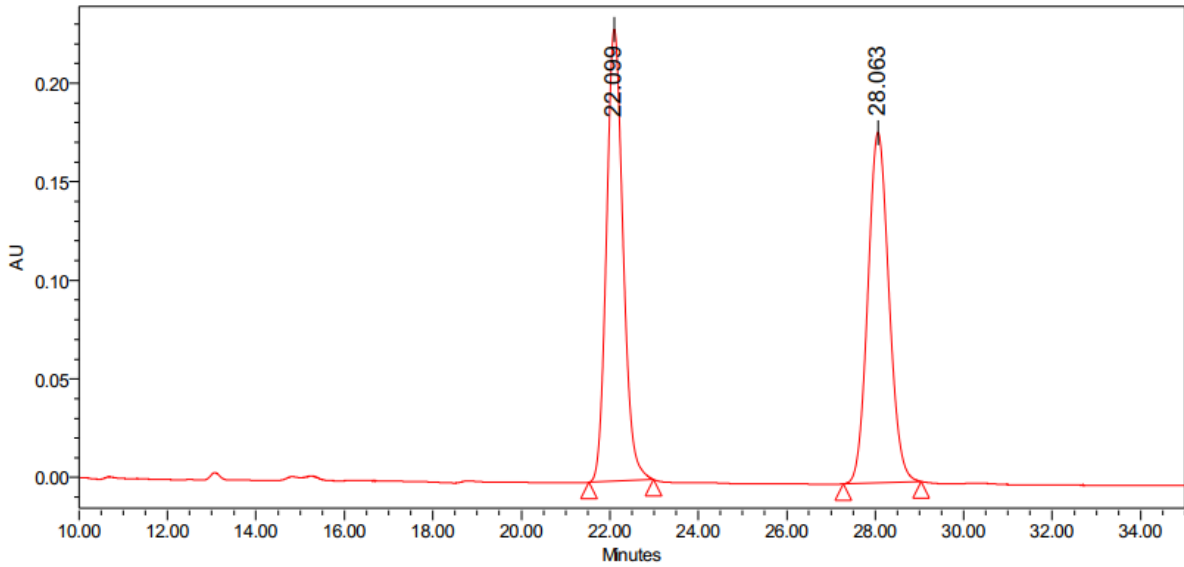

| Name | RT     | Area    | % Area |
|------|--------|---------|--------|
| 1    | 22.099 | 5972657 | 50.40  |
| 2    | 28.063 | 5876945 | 49.60  |

## HPLC spectra of chiral 5ae

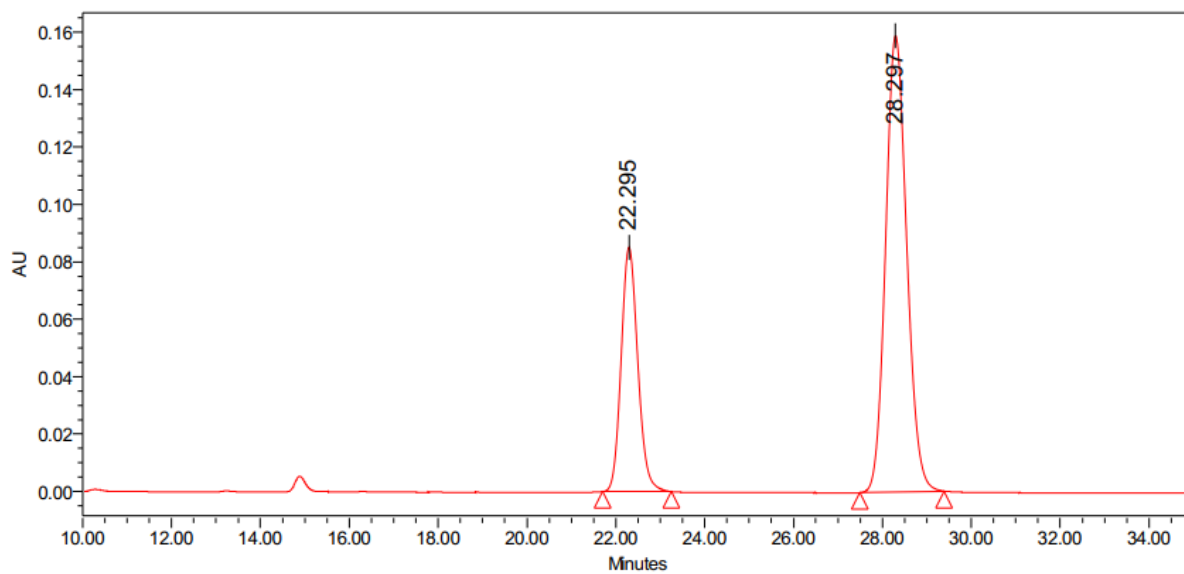

Peak Results

| Name | RT     | Area    | % Area |
|------|--------|---------|--------|
| 1    | 22.295 | 2215293 | 29.65  |
| 2    | 28.297 | 5255553 | 70.35  |

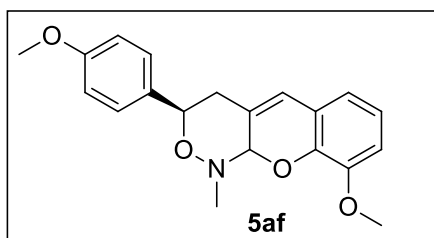

## <sup>1</sup>H-NMR (CDCl<sub>3</sub>, 400MHz) of 5af

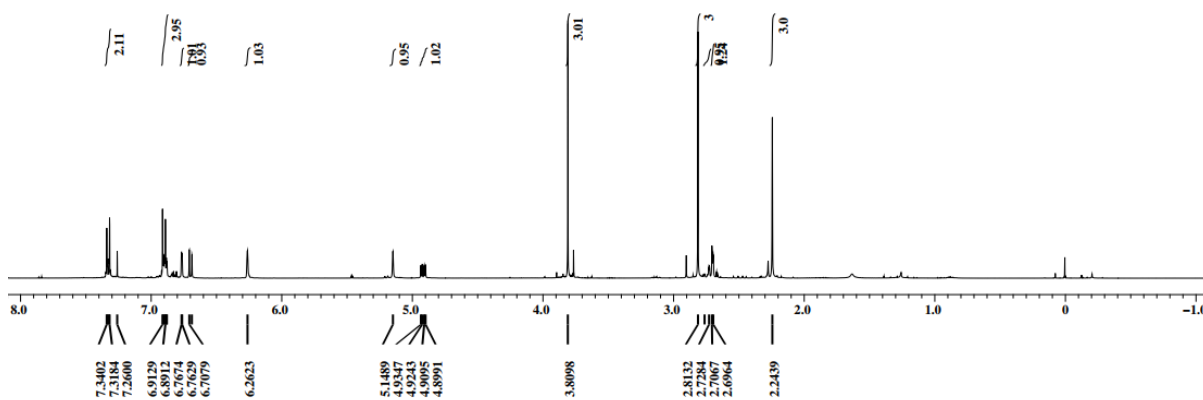

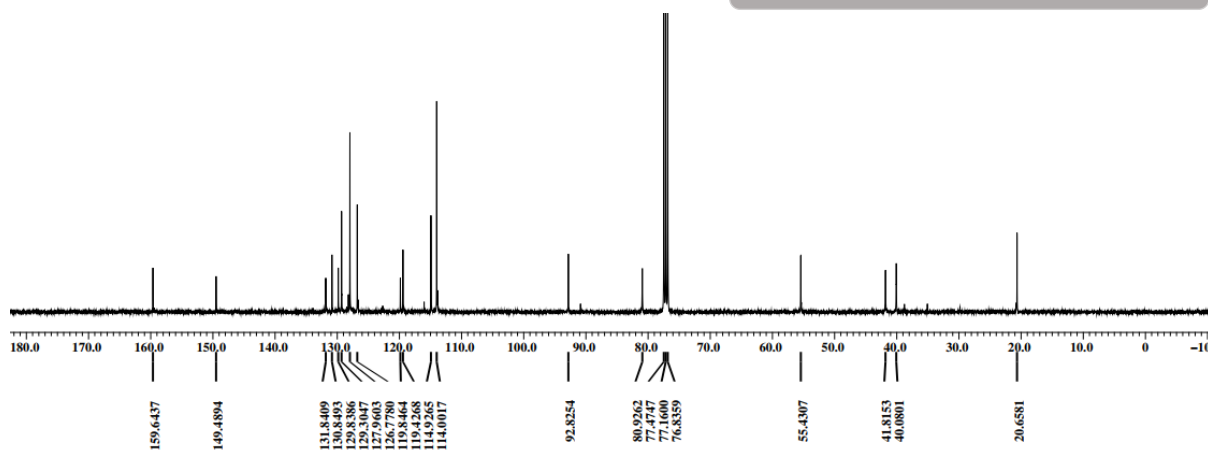

HRMS of 5af

Elemental Composition Report

Single Mass Analysis

Tolerance = 5.0 mDa / DBE: min = -1.5, max = 50.0  
Element prediction: Off  
Number of isotope peaks used for i-FIT = 3

Monoisotopic Mass, Even Electron Ions

38 formula(e) evaluated with 1 results within limits (up to 50 closest results for each mass)

Elements Used:

C: 0-20 H: 0-100 N: 0-3 O: 0-4

130223\_25\_03\_08 51 (0.534)

IITRPR

XEVO G2-XS QTOF

130223\_25\_03\_08

Test Name :  
1: TOF MS ES+

7.53e+006

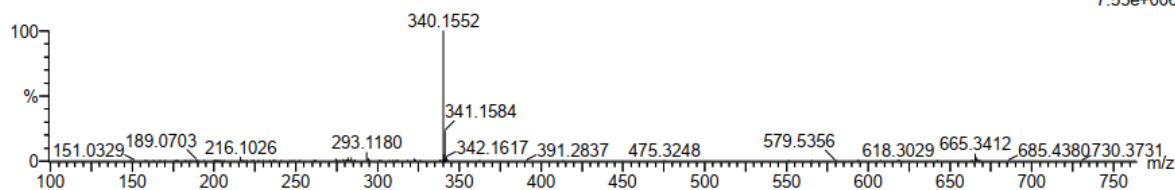

Minimum: -1.5  
Maximum: 5.0 10.0 50.0

| Mass     | Calc. Mass | mDa | PPM | DBE  | i-FIT  | Norm | Conf (%) | Formula      |
|----------|------------|-----|-----|------|--------|------|----------|--------------|
| 340.1552 | 340.1549   | 0.3 | 0.9 | 10.5 | 1092.8 | n/a  | n/a      | C20 H22 N O4 |

### HPLC spectra of racemic 5af

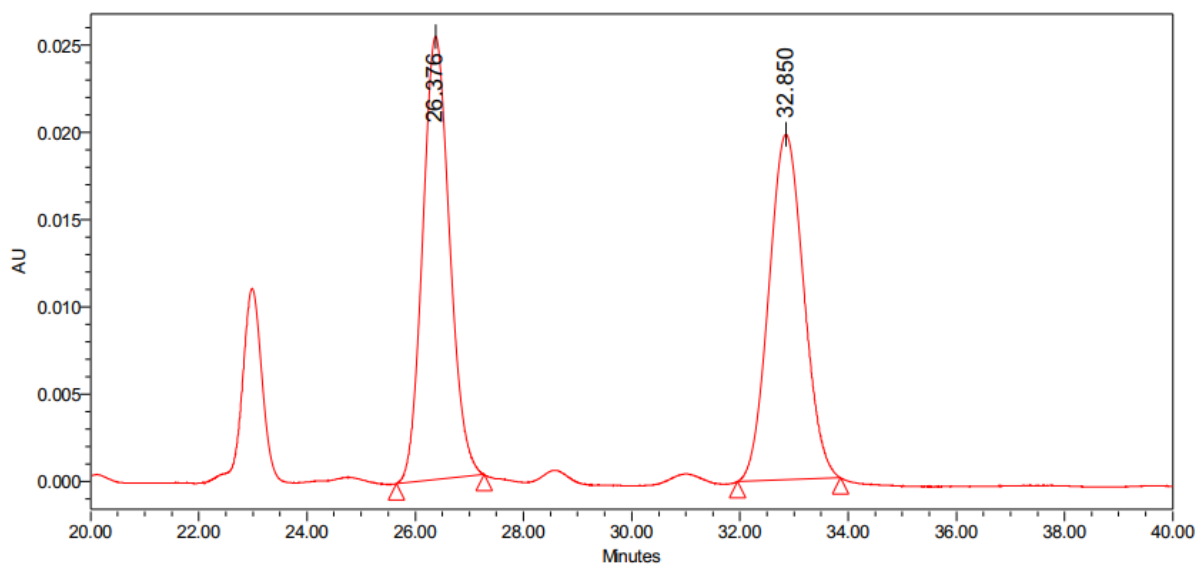

Peak Results

| Name | RT     | Area   | % Area |
|------|--------|--------|--------|
| 1    | 26.376 | 873597 | 49.82  |
| 2    | 32.850 | 879805 | 50.18  |

### HPLC spectra of chiral 5af

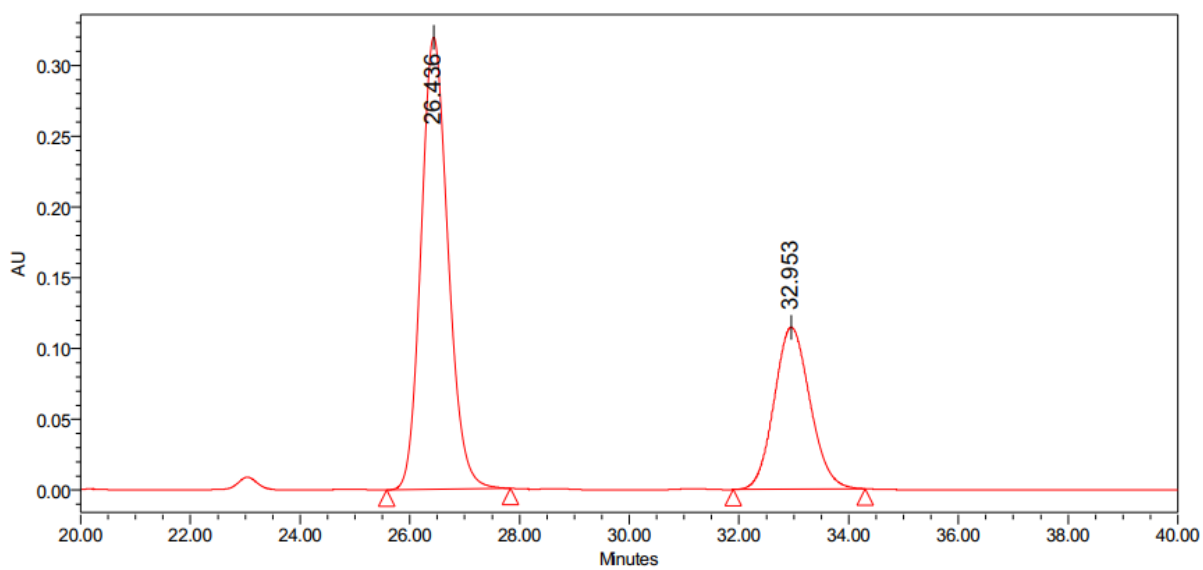

Peak Results

| Name | RT     | Area     | % Area |
|------|--------|----------|--------|
| 1    | 26.436 | 10929958 | 67.82  |
| 2    | 32.953 | 5186484  | 32.18  |

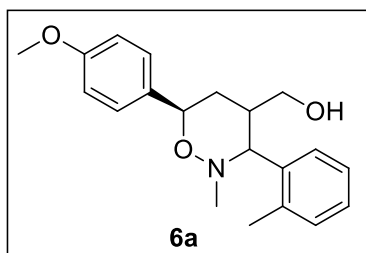

**<sup>1</sup>H-NMR (CDCl<sub>3</sub>, 400MHz) of 6a**

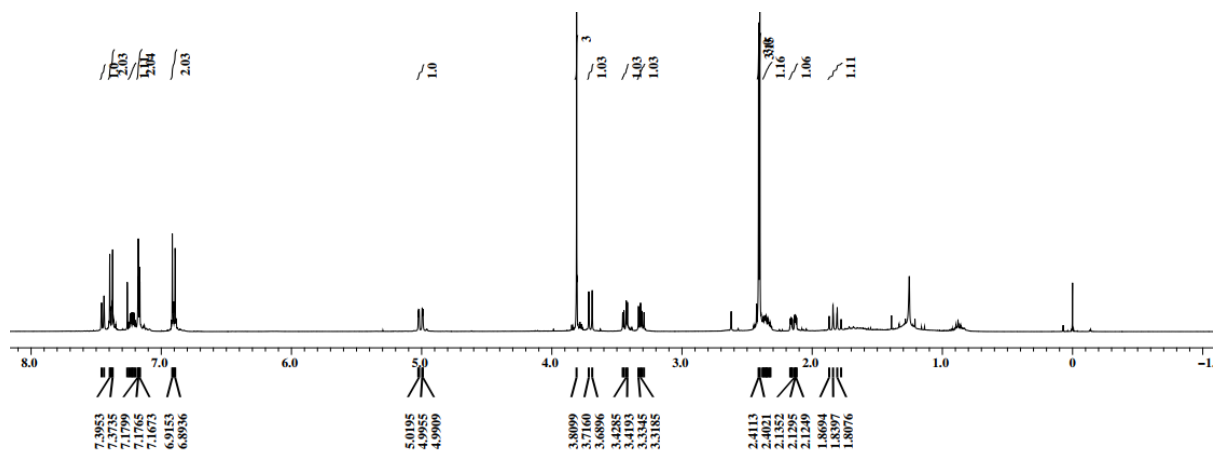

**<sup>13</sup>C-NMR (CDCl<sub>3</sub>, 100MHz) of 6a**

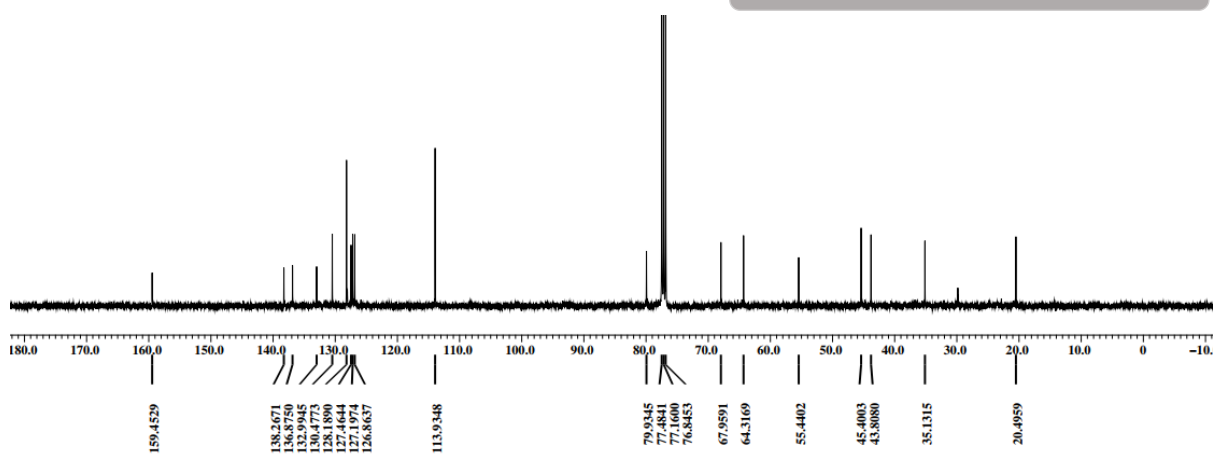

**Single Mass Analysis**

Tolerance = 5.0 mDa / DBE: min = -1.5, max = 50.0

Element prediction: Off

Number of isotope peaks used for i-FIT = 3

Monoisotopic Mass, Even Electron Ions

153 formula(e) evaluated with 1 results within limits (up to 50 closest results for each mass)

Elements Used:

C: 0-23 H: 0-100 N: 0-3 O: 0-4 Cl: 0-1

240223\_25\_03\_19 25 (0.277)

IITRPR

XEVO G2-XS QTOF

240223\_25\_03\_19

Test Name

1: TOF MS ES+

2.80e+006

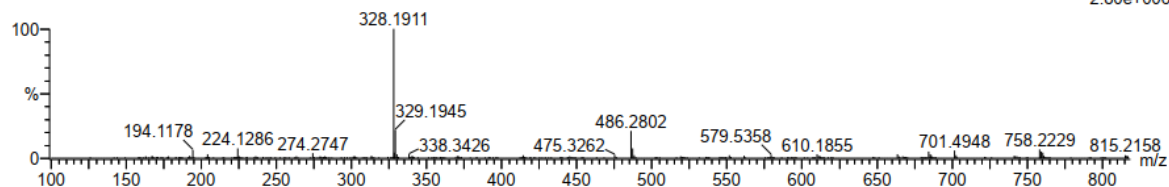

Minimum: -1.5  
Maximum: 5.0 10.0 50.0

| Mass     | Calc. Mass | mDa  | PPM  | DBE | i-FIT | Norm | Conf(%) | Formula      |
|----------|------------|------|------|-----|-------|------|---------|--------------|
| 328.1911 | 328.1913   | -0.2 | -0.6 | 8.5 | 987.9 | n/a  | n/a     | C20 H26 N O3 |

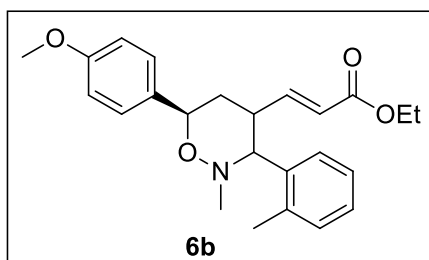

**<sup>1</sup>H-NMR (CDCl<sub>3</sub>, 400MHz) of 6b**

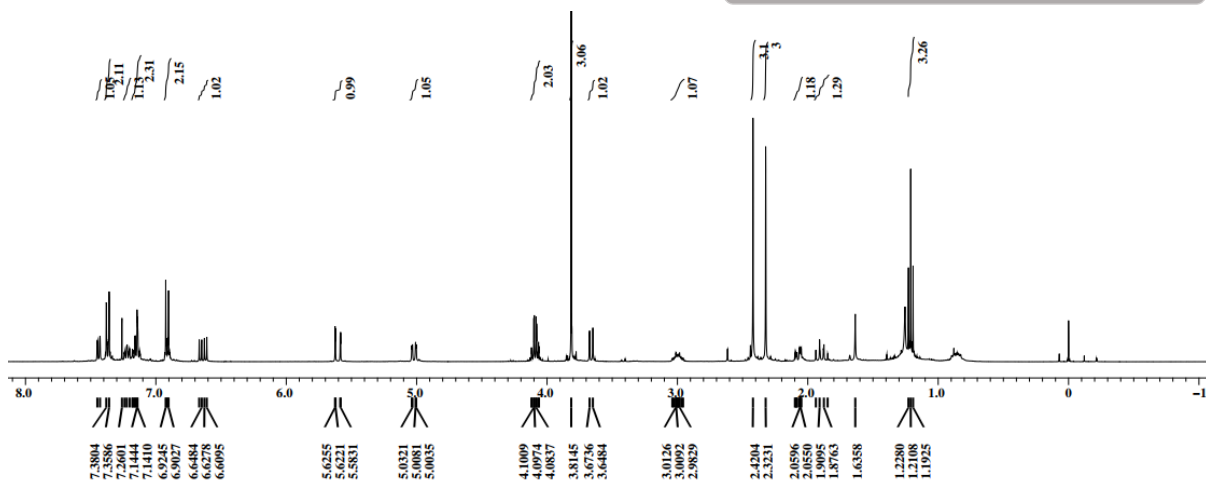



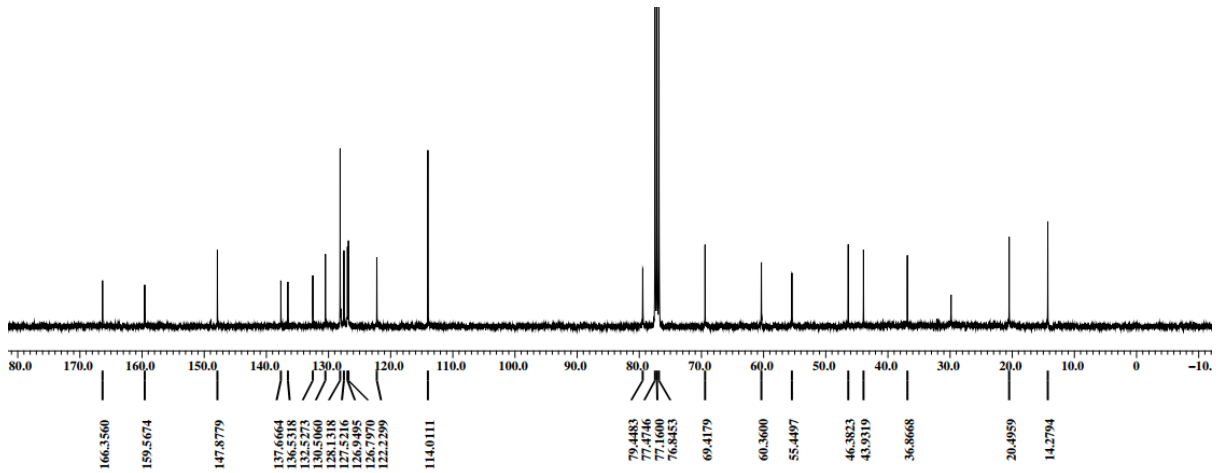

HRMS of 6b

Elemental Composition Report

Single Mass Analysis

Tolerance = 5.0 mDa / DBE: min = -1.5, max = 50.0

Element prediction: Off

Number of isotope peaks used for i-FIT = 3

Monoisotopic Mass, Even Electron Ions

11 formula(e) evaluated with 1 results within limits (up to 50 closest results for each mass)

Elements Used:

C: 0-24 H: 0-30 N: 0-2 O: 0-4

100323\_25\_03\_18 26 (0.285)

IITRPR

XEVO G2-XS QTOF

100323\_25\_03\_18

Test Name :

6.36e+006

1: TOF MS ES+

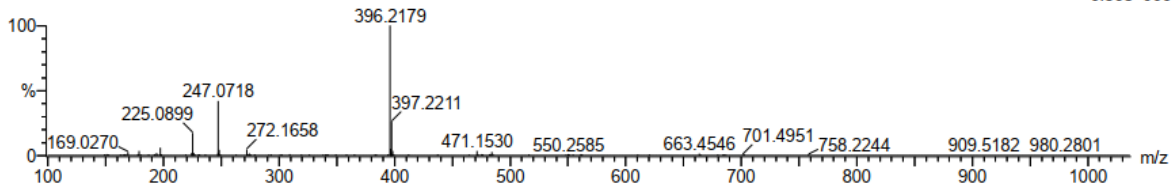

Minimum: -1.5  
Maximum: 50.0

| Mass     | Calc. Mass | mDa | PPM | DBE  | i-FIT | Norm | Conf (%) | Formula      |
|----------|------------|-----|-----|------|-------|------|----------|--------------|
| 396.2179 | 396.2175   | 0.4 | 1.0 | 10.5 | 935.6 | n/a  | n/a      | C24 H30 N O4 |

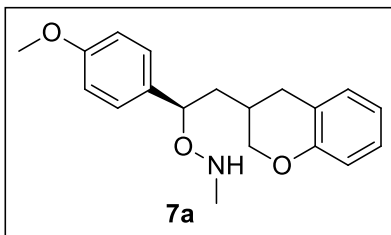

**<sup>1</sup>H-NMR (CDCl<sub>3</sub>, 400MHz) of 7a**

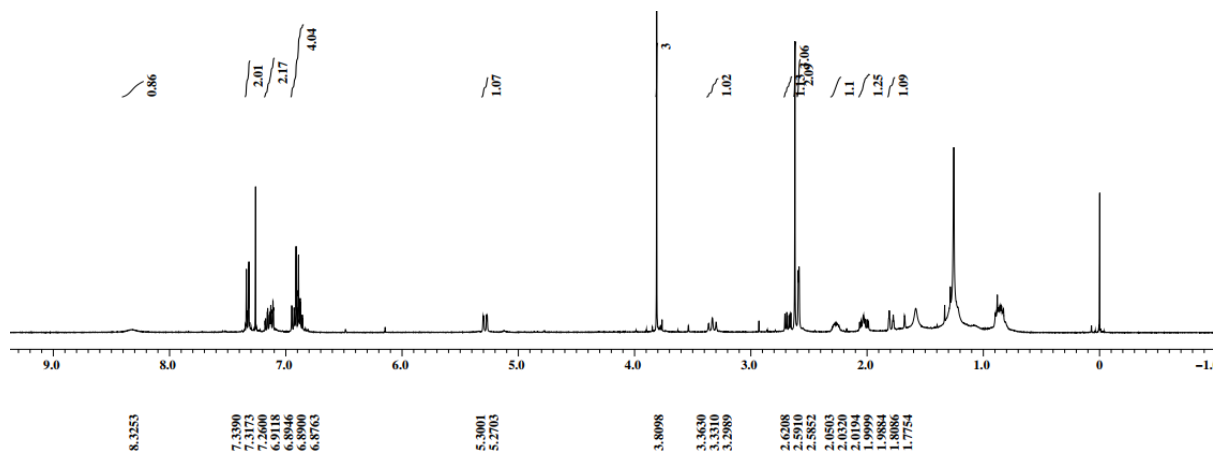

**<sup>13</sup>C-NMR (CDCl<sub>3</sub>, 100MHz) of 7a**

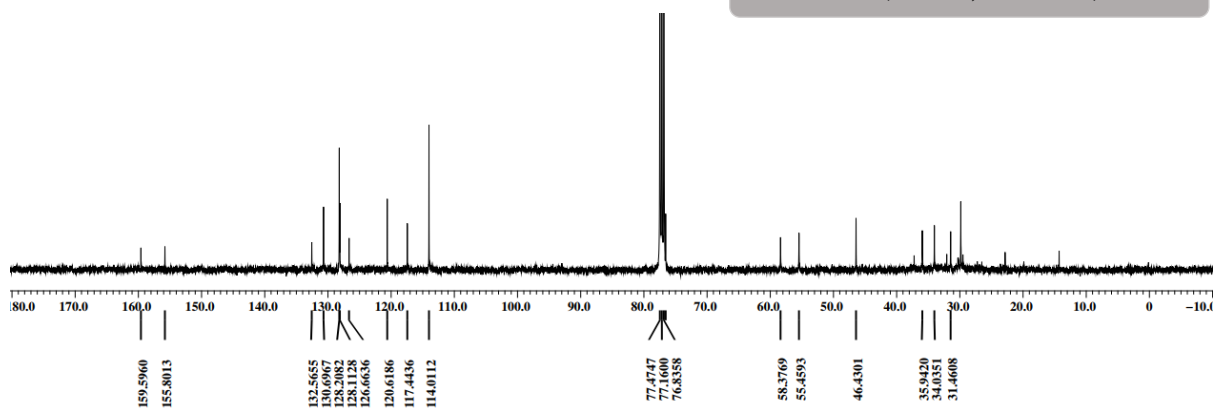

<sup>13</sup>C, <sup>1</sup>H HSQC NMR (CDCl<sub>3</sub>, 100, 400 MHz) of 7a

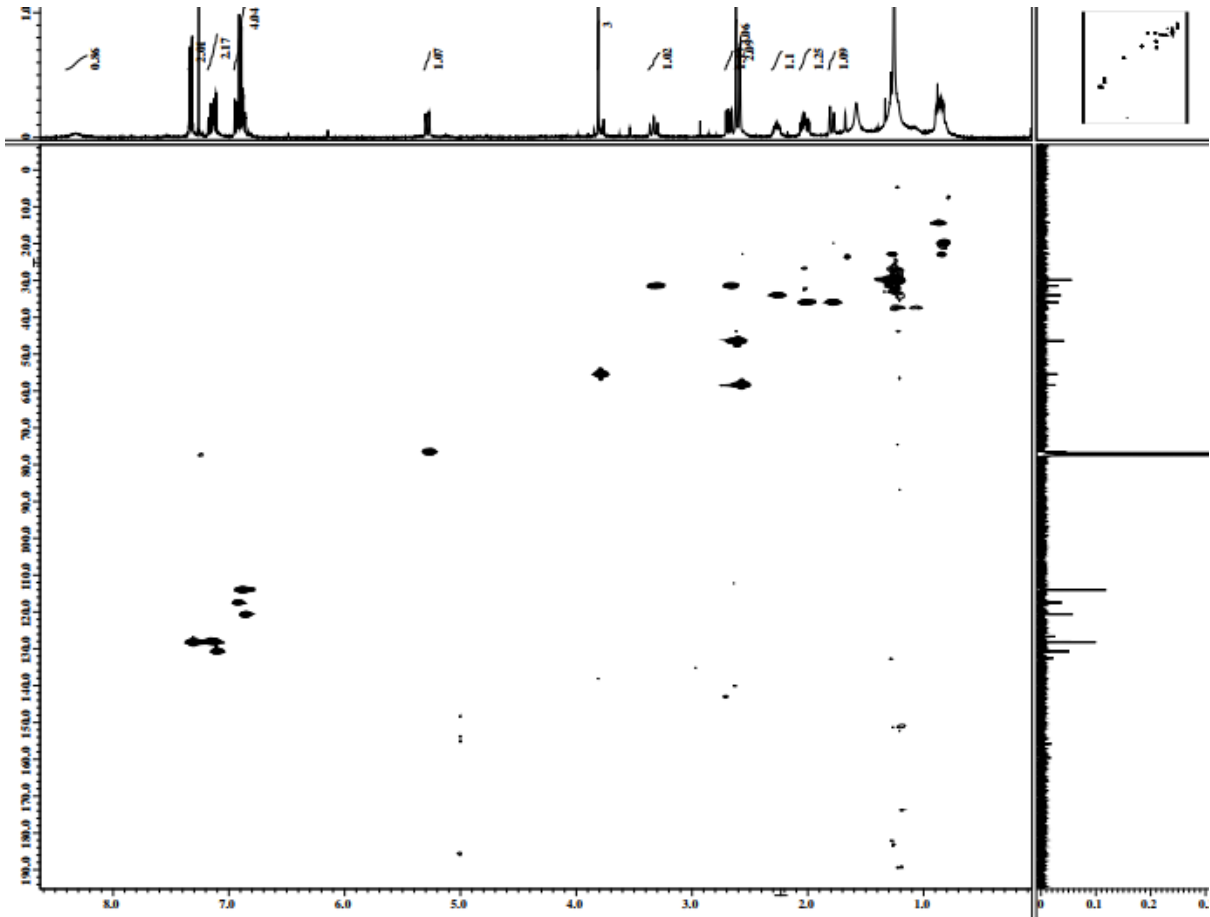

HRMS of 7a

Elemental Composition Report

Page 1

Single Mass Analysis

Tolerance = 20.0 PPM / DBE: min = -1.5, max = 50.0

Element prediction: Off

Number of isotope peaks used for i-FIT = 3

Monoisotopic Mass, Even Electron Ions

74 formula(e) evaluated with 1 results within limits (up to 50 closest results for each mass)

Elements Used:

C: 0-26 H: 0-50 N: 0-2 O: 0-5

120423\_25\_03\_22 20 (0.223)

IITRPR

XEVO G2-XS QTOF

Test Name :

120423\_25\_03\_22

1: TOF MS ES+

4.13e+006

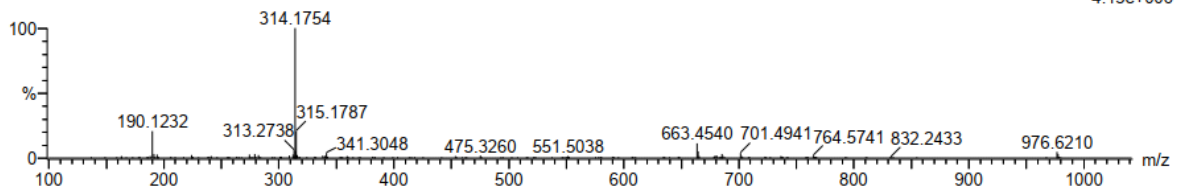

Minimum: -1.5  
Maximum: 5.0 20.0 50.0

| Mass     | Calc. Mass | mDa  | PPM  | DBE | i-FIT  | Norm | Conf (%) | Formula      |
|----------|------------|------|------|-----|--------|------|----------|--------------|
| 314.1754 | 314.1756   | -0.2 | -0.6 | 8.5 | 1025.7 | n/a  | n/a      | C19 H24 N O3 |

## 8. X-ray data of 5aa

For the determination of X-ray crystal structures of **5aa** single crystal was selected and mounted with paratone oil on a glass fiber using gum. The data was collected at 293K on a CMOS based Bruker D8 Venture PHOTON 100 diffractometer equipped with a INCOATEC micro-focus source with graphite monochromatic Mo K $\alpha$  radiation ( $\lambda = 0.71073 \text{ \AA}$ ) operation at 50 kV and 30 mA. For the integration of diffraction profiles SAINT program<sup>6</sup> was used. Absorption correction was done applying SADABS program.<sup>7</sup> The crystal structure was solved by SIR 92<sup>8</sup> and refined by full matrix least square method using SHELXL-97<sup>9</sup> WinGX system, Ver 1.70.01.<sup>10</sup> All the non-hydrogen atoms in the structure were located the Fourier map and refined anisotropically. The hydrogen atoms were fixed by HFIX in their ideal positions and refined using riding model with isotropic thermal parameters. The crystal structure (excluding structure factor) has been deposited to Cambridge Crystallographic Data Centre and allocated deposition number: **5aa: CCDC 2237741**.

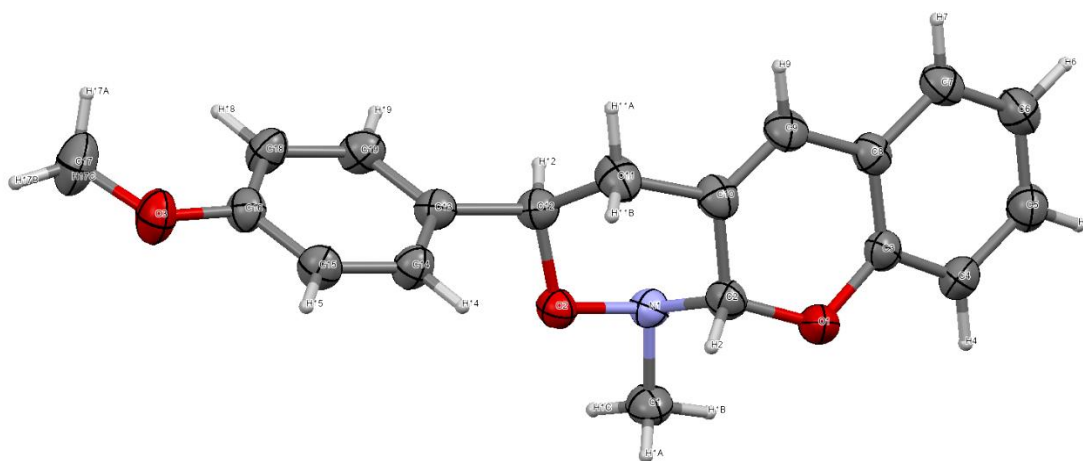

**Table S2. Crystal data and structure refinement for 5aa.**

|                                  |                                                 |
|----------------------------------|-------------------------------------------------|
| Ccdc no.                         | 2237741                                         |
| Empirical formula                | C <sub>19</sub> H <sub>19</sub> NO <sub>3</sub> |
| Formula weight                   | 309.35                                          |
| Temperature/K                    | 298.0                                           |
| Crystal system                   | orthorhombic                                    |
| Space group                      | P2 <sub>1</sub> 2 <sub>1</sub> 2 <sub>1</sub>   |
| a/Å                              | 5.8734(3)                                       |
| b/Å                              | 15.4556(7)                                      |
| c/Å                              | 17.6587(7)                                      |
| $\alpha$ /°                      | 90                                              |
| $\beta$ /°                       | 90                                              |
| $\gamma$ /°                      | 90                                              |
| Volume/Å <sup>3</sup>            | 1603.00(13)                                     |
| Z                                | 4                                               |
| $\rho_{\text{calc}}/\text{cm}^3$ | 1.282                                           |

|                                                |                                                               |
|------------------------------------------------|---------------------------------------------------------------|
| $\mu/\text{mm}^{-1}$                           | 0.087                                                         |
| F(000)                                         | 656.0                                                         |
| Crystal size/ $\text{mm}^3$                    | $0.35 \times 0.236 \times 0.123$                              |
| Radiation                                      | MoK $\alpha$ ( $\lambda = 0.71073$ )                          |
| $2\Theta$ range for data collection/ $^\circ$  | 4.614 to 52.79                                                |
| Index ranges                                   | $-7 \leq h \leq 7, -19 \leq k \leq 19, -22 \leq l \leq 22$    |
| Reflections collected                          | 33944                                                         |
| Independent reflections                        | 3289 [ $R_{\text{int}} = 0.0505, R_{\text{sigma}} = 0.0225$ ] |
| Data/restraints/parameters                     | 3289/0/210                                                    |
| Goodness-of-fit on $F^2$                       | 1.087                                                         |
| Final R indexes [ $I \geq 2\sigma(I)$ ]        | $R_1 = 0.0360, wR_2 = 0.0859$                                 |
| Final R indexes [all data]                     | $R_1 = 0.0444, wR_2 = 0.0908$                                 |
| Largest diff. peak/hole / $e \text{ \AA}^{-3}$ | 0.12/-0.10                                                    |
| Flack parameter                                | 0.2(5)                                                        |

**Table S3: Selected bond lengths of 5aa**

| Atoms    | Length/ $\text{\AA}$ | Atoms    | Length/ $\text{\AA}$ |
|----------|----------------------|----------|----------------------|
| O2- N1   | 1.475(2)             | C13- C12 | 1.509(3)             |
| O2- C12  | 1.435(3)             | C13- C19 | 1.370(3)             |
| O1- C3   | 1.377(3)             | C14- C15 | 1.380(3)             |
| O1- C2   | 1.417(3)             | C7- C6   | 1.381(3)             |
| N1- C1   | 1.455(3)             | C15- C16 | 1.382(3)             |
| N1- C2   | 1.481(3)             | C10- C2  | 1.493(3)             |
| O3- C16  | 1.366(3)             | C10- C11 | 1.498(3)             |
| O3- C17  | 1.418(4)             | C3- C4   | 1.376(3)             |
| C8- C9   | 1.453(3)             | C12- C11 | 1.523(3)             |
| C8- C9   | 1.390(3)             | C18- C16 | 1.382(3)             |
| C8- C3   | 1.390(3)             | C18- C19 | 1.391(3)             |
| C9- C10  | 1.320(3)             | C4- C5   | 1.384(3)             |
| C13- C14 | 1.393(3)             | C5- C6   | 1.376(4)             |

**Table S4: Selected bond angles of 5aa**

| Atom         | Angle/ $^\circ$ | Atom          | Angle/ $^\circ$ |
|--------------|-----------------|---------------|-----------------|
| C12- O2- N1  | 108.46(14)      | O1- C3- C8    | 121.3(2)        |
| C3- O1- C2   | 120.09(18)      | C4- C3- O1    | 116.8(2)        |
| O2- N1- C2   | 103.21(15)      | C4- C3- C8    | 121.9(2)        |
| C1- N1- O2   | 103.55(16)      | O2- C12- C13  | 106.62(18)      |
| C1- N1- C2   | 112.55(19)      | O2- C12- C11  | 109.18(19)      |
| C16- O3- C17 | 117.7(2)        | C13- C12- C11 | 113.76(18)      |

| Atom          | Angle/°  | Atom          | Angle/°    |
|---------------|----------|---------------|------------|
| C7- C8- C9    | 123.9(2) | C16- C18- C19 | 119.3(2)   |
| C3- C8- C9    | 118.3(2) | O1- C2- N1    | 108.86(18) |
| C3- C8- C7    | 117.7(2) | O1- C2- C10   | 115.90(18) |
| C10- C9- C8   | 121.2(2) | N1- C2- C10   | 105.93(19) |
| C14- C13-     | 121.0(2) | C3- C4- C5    | 119.2(2)   |
| C19- C12      | 117.9(2) | O3- C16- C15  | 115.6(2)   |
| C19- C13- C12 | 121.2(2) | O3- C16- C18  | 124.8(2)   |
| C15- C14- C13 | 121.0(2) | C15- C16- C18 | 119.6(2)   |
| C6- C7- C8    | 120.8(2) | C13- C19- C18 | 122.0(2)   |
| C14- C15- C16 | 120.2(2) | C10- C11- C12 | 109.39(18) |
| C9- C10- C2   | 120.6(2) | C6- C5- C4    | 120.1(2)   |
| C9- C10- C11  | 126.3(2) | C5- C6- C7    | 120.3(2)   |
| C2- C10- C11  | 112.3(2) |               |            |

## 9. Control experiments

To check whether the aryl migration was occurring under catalytic or non-catalytic conditions, some control experiments have been performed. First, the TBS-protected product **4ae** was subjected to hydrolysis in both TBAF/THF condition and Oxone/water condition but the product got decomposed without forming neither the free OH-containing product nor the aryl migrated product (from the <sup>1</sup>H-NMR study). Additionally the authors tried to get HRMS data of the crude reaction mixture at half completion time for the preparation of **5aa** and the in situ generated intermediate **B** was detected instead of intermediate **C** prior to the aryl migration. Which indicates that the aryl migration occurs under catalytic conditions.

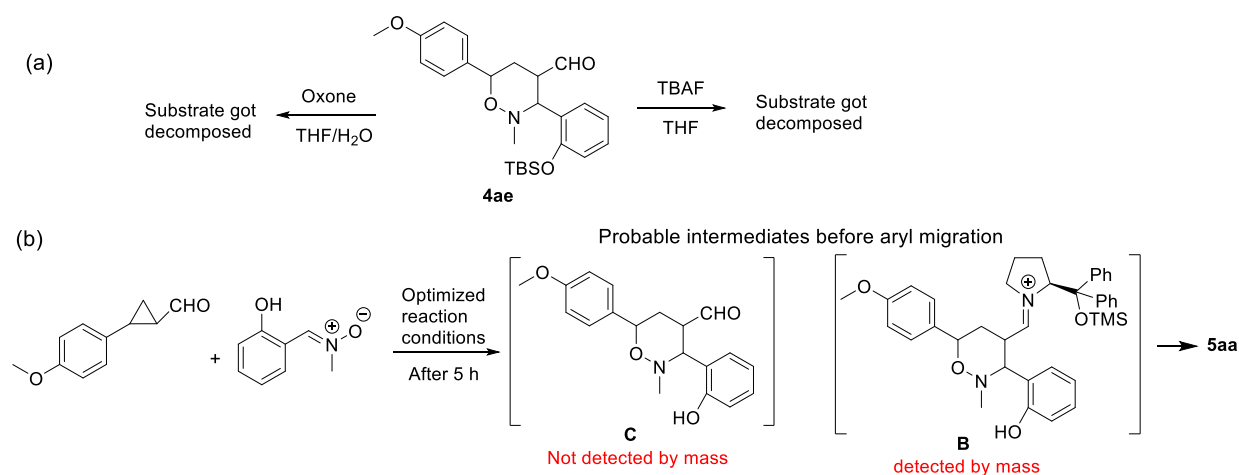

**Scheme S1:** Control experiments; (a) hydrolysis of **4ae**, (b) trapping of intermediates

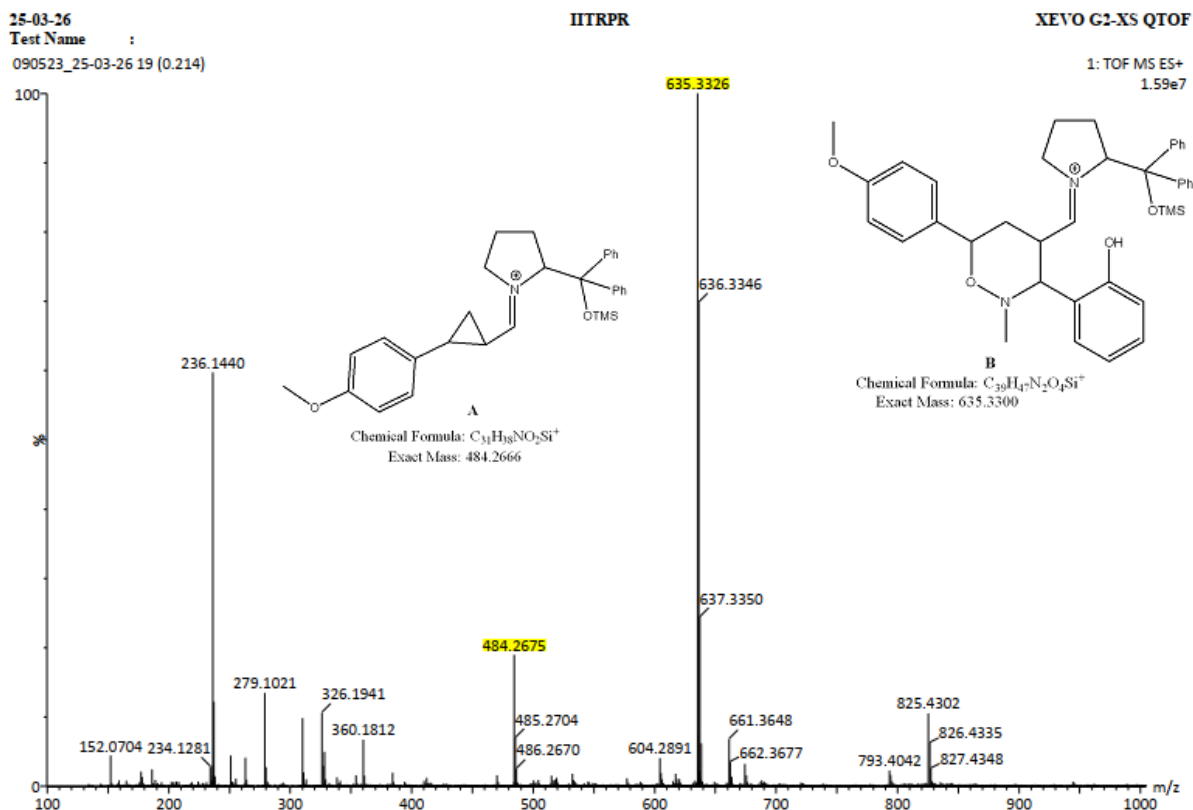

Figure S1: Mass traces of probable intermediates

## 10. Rearrangement reaction for the production of aryl aldehydes

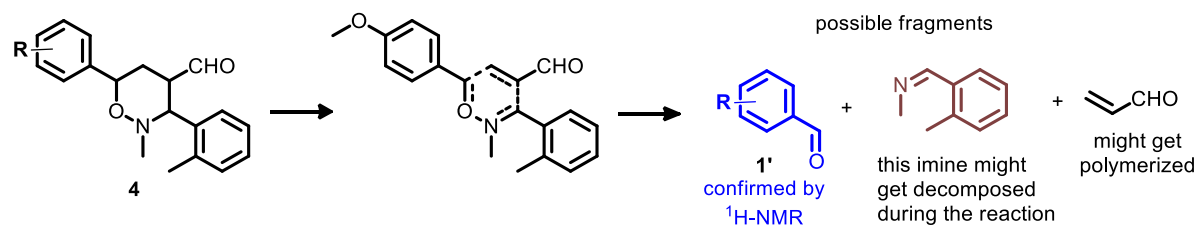

Figure S2: Rearrangement pathway for the aryl aldehyde formation

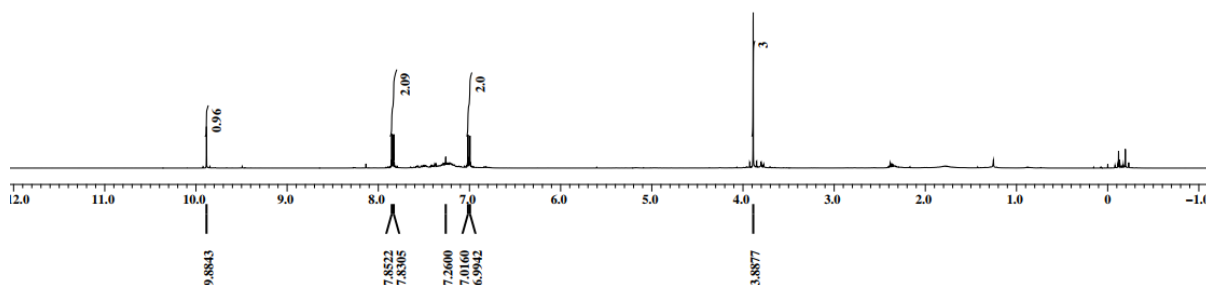

Figure S3: <sup>1</sup>H-NMR of isolated **1a'** (4-methoxy benzaldehyde)

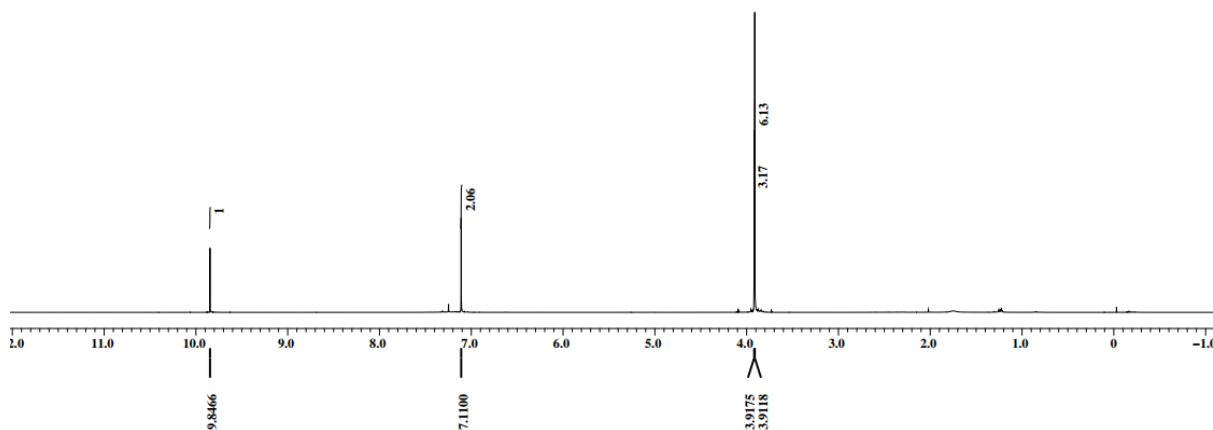

**Figure S4:** <sup>1</sup>H-NMR of isolated **1f** (3,4,5-trimethoxy benzaldehyde)

## 11. References

1. (a) P. Kumar, R. Dey and P. Banerjee, *Org. Lett.* 2018, **20**, 5163; (b) R. Dey, P. Kumar, and P. Banerjee, *J. Org. Chem.* 2018, **83**, 5438.
2. Pernille H. Poulsen, Stefania Vergura, Alicia Monleon, Danny Kaare Bech Jørgensen and Karl Anker Jørgensen, *J. Am. Chem. Soc.* 2016, **138**, 6412.
3. L. Blackburn and R. J. K. Taylor, *Org. Lett.*, 2001, **3**, 1637.
4. Kaori Ando and Kyohei Yamada, *Green Chem.*, 2011, **13**, 1143
5. K. Verma, P. Banerjee, *Adv. Synth. Catal.* **2016**, 358, 2053.
6. Bruker, SAINT V7.68A, Bruker AXS Inc., Madison (WI, USA) 2005.
7. Sheldrick, G. M. SADABS 2008/2, Göttingen 2008.
8. A. Altomare, G. Cascarano, C. Giacovazzo, A. Guagliardi, *J. Appl. Cryst.* 1993, **26**, 343.
9. Sheldrick, G. M. SHELXL-97, Program for Crystal Structure Solution and Refinement, University of Göttingen, Göttingen, Germany 1997.
10. L. J. Farrugia, *J. Appl. Cryst.* 1999, **32**, 837.
